# Supplementary material for: MicroRNA-like snoRNA-Derived RNAs (sdRNAs) Promote Castration-Resistant Prostate Cancer
Source: MDPI journal article supplement (doi:10.3390/cells11081302), 2022-04-12

# Supplementary File S1. Select misannotated human microRNAs processed from snoRNAs.

Images generated by Ensembl genome browser. **(A)** Human microRNA hsa-miR-664b is entirely embedded in SNORA36A

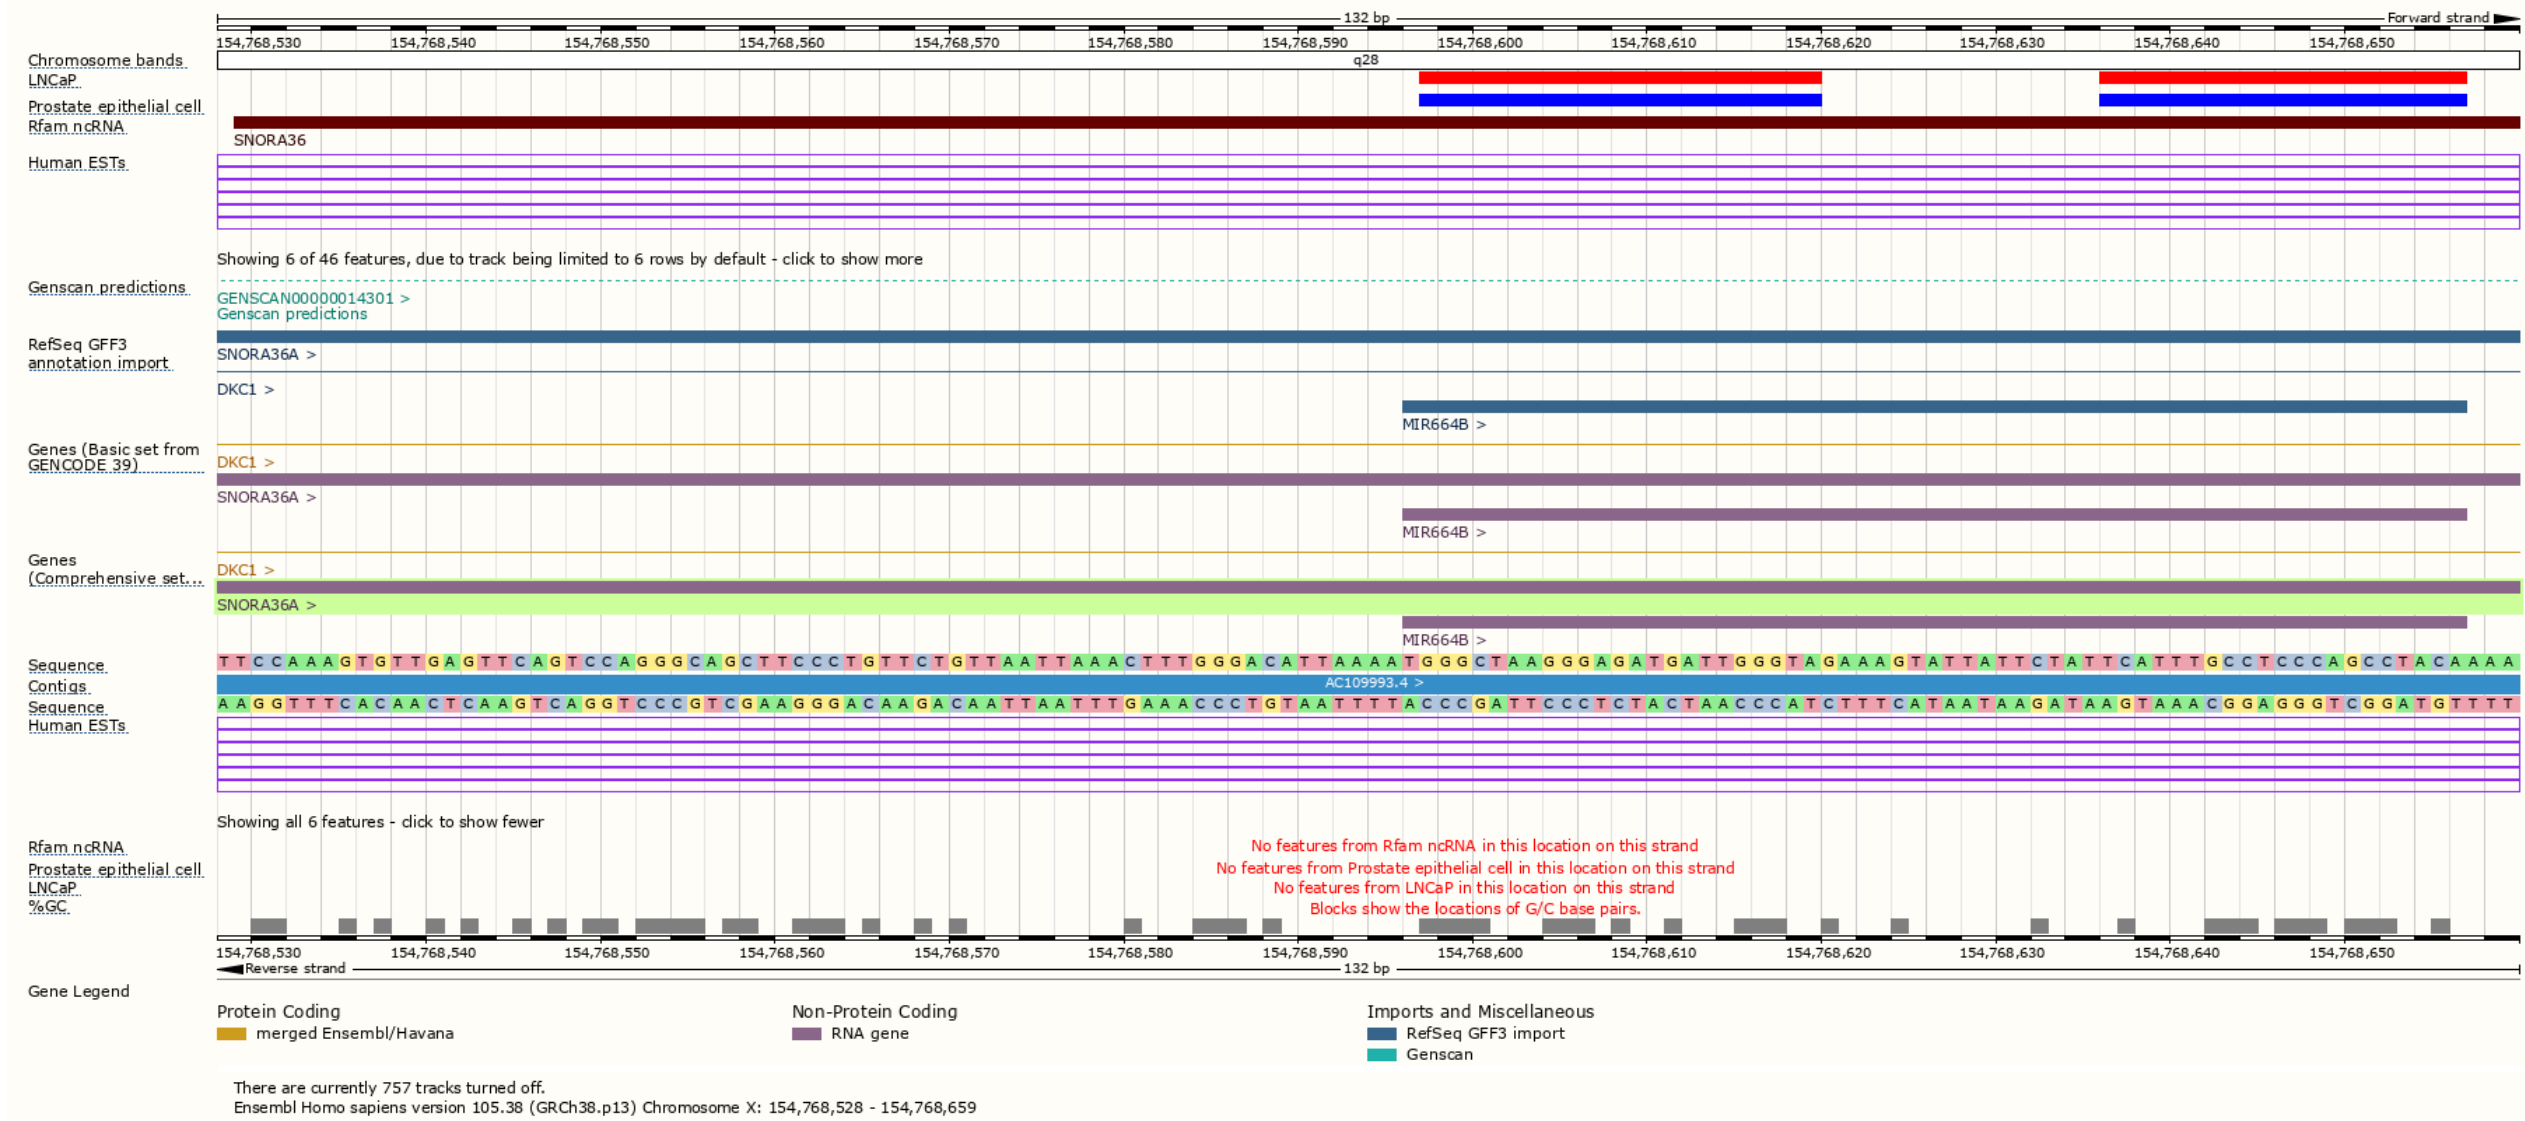

Supplementary File 1. Select misannotated human microRNAs processed from snoRNAs.

(B) Human microRNA hsa-miR-664a is entirely embedded in SNORA36B.

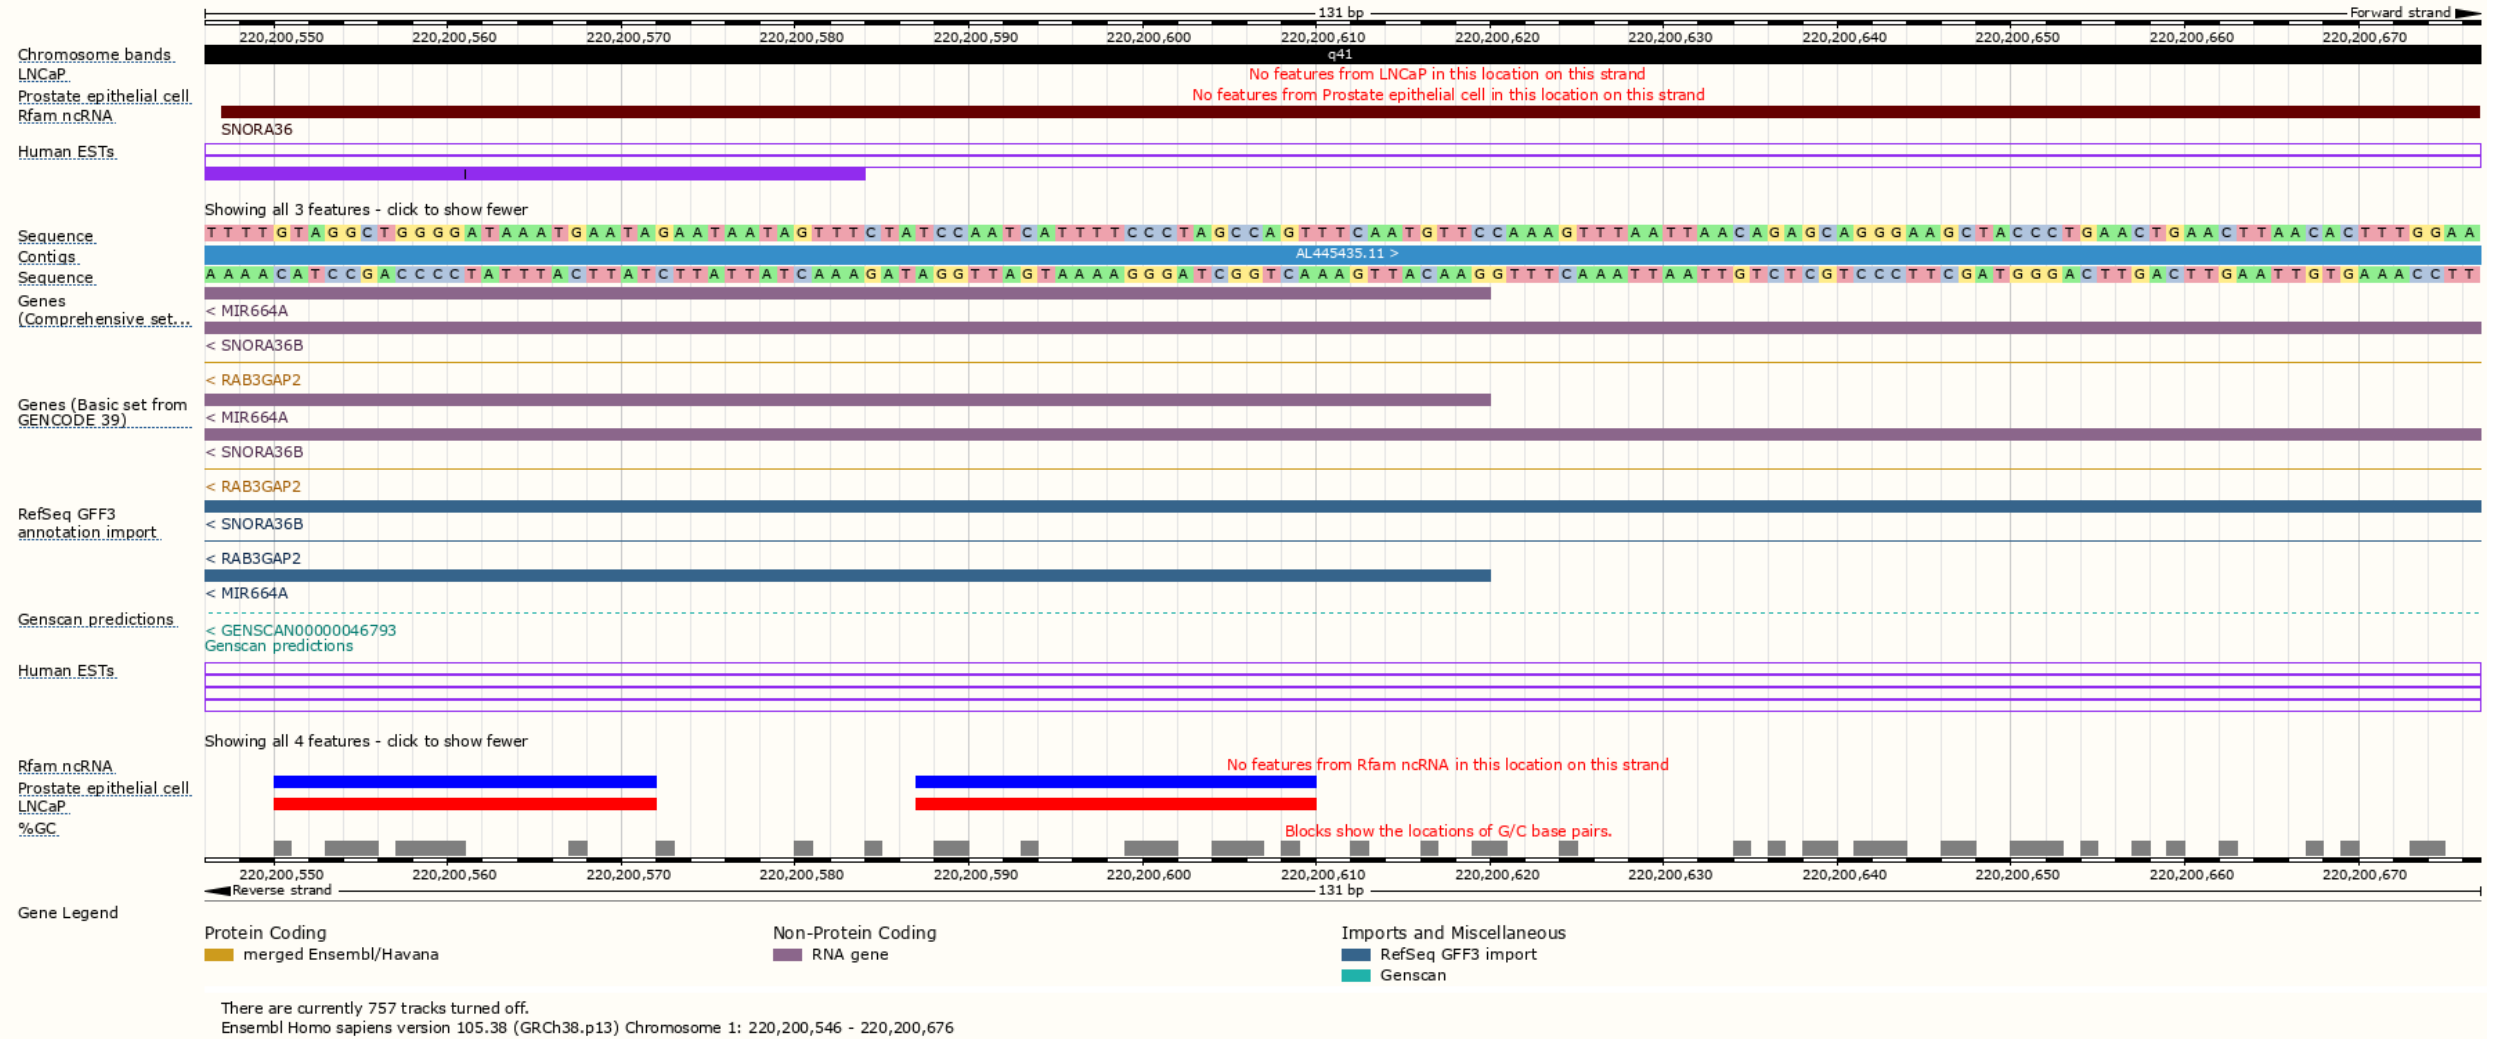

Supplementary File 1. Select misannotated human microRNAs processed from snoRNAs.

(C) Human microRNA hsa-miR-1291 is entirely embedded in SNORA2C.

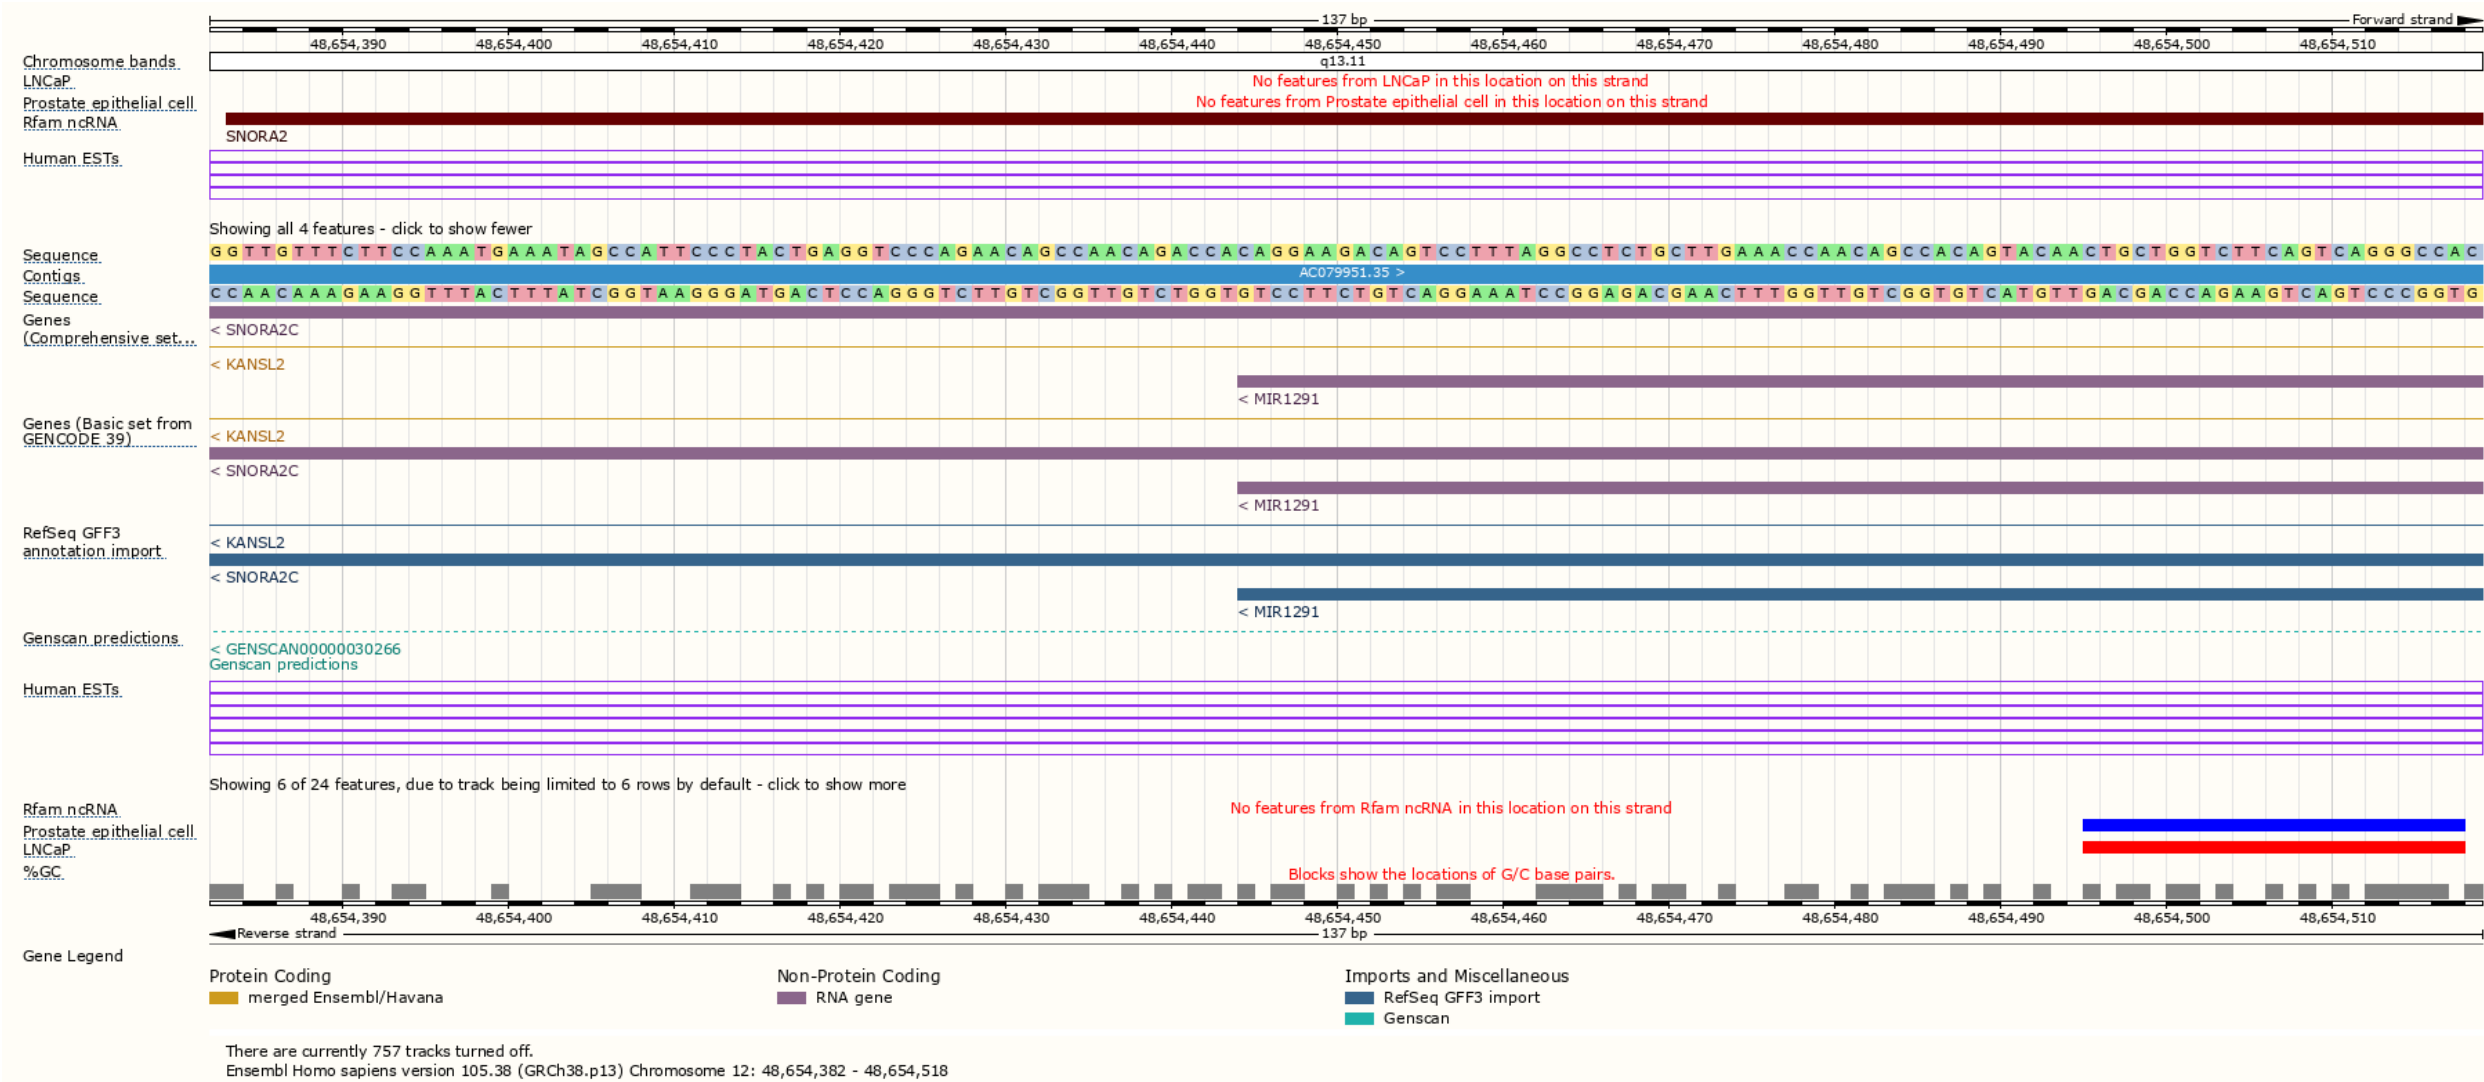

Supplementary File 1. Select misannotated human microRNAs processed from snoRNAs.

(D) Human microRNA hsa-miR-3651 is entirely embedded in SNORA84.

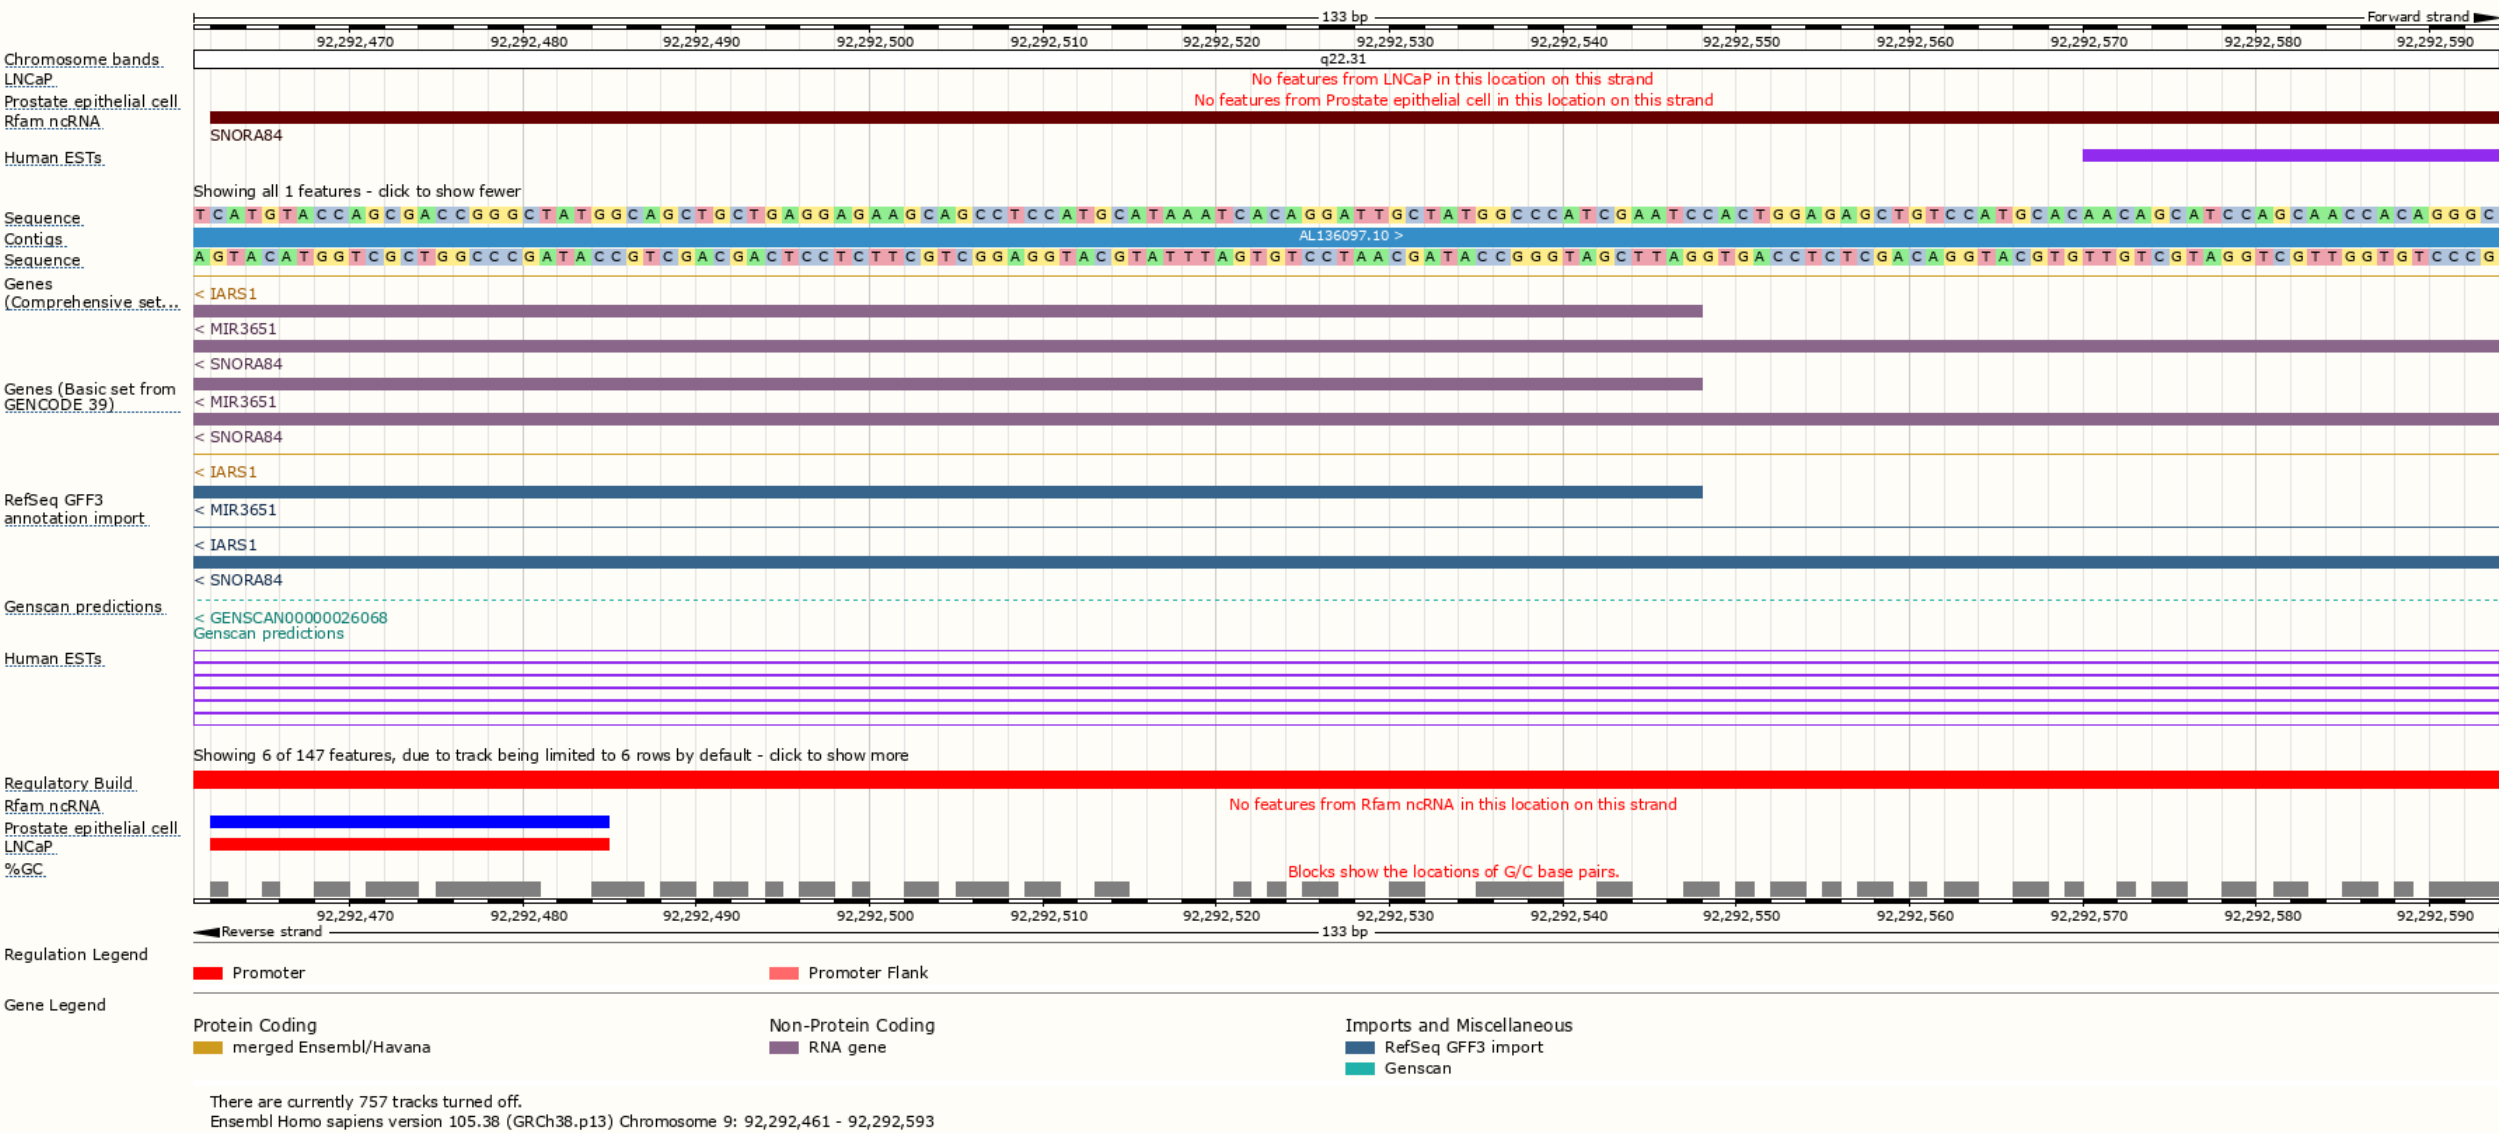

**(E)** Human microRNA hsa-miR-1248 is entirely embedded in SNORA81.

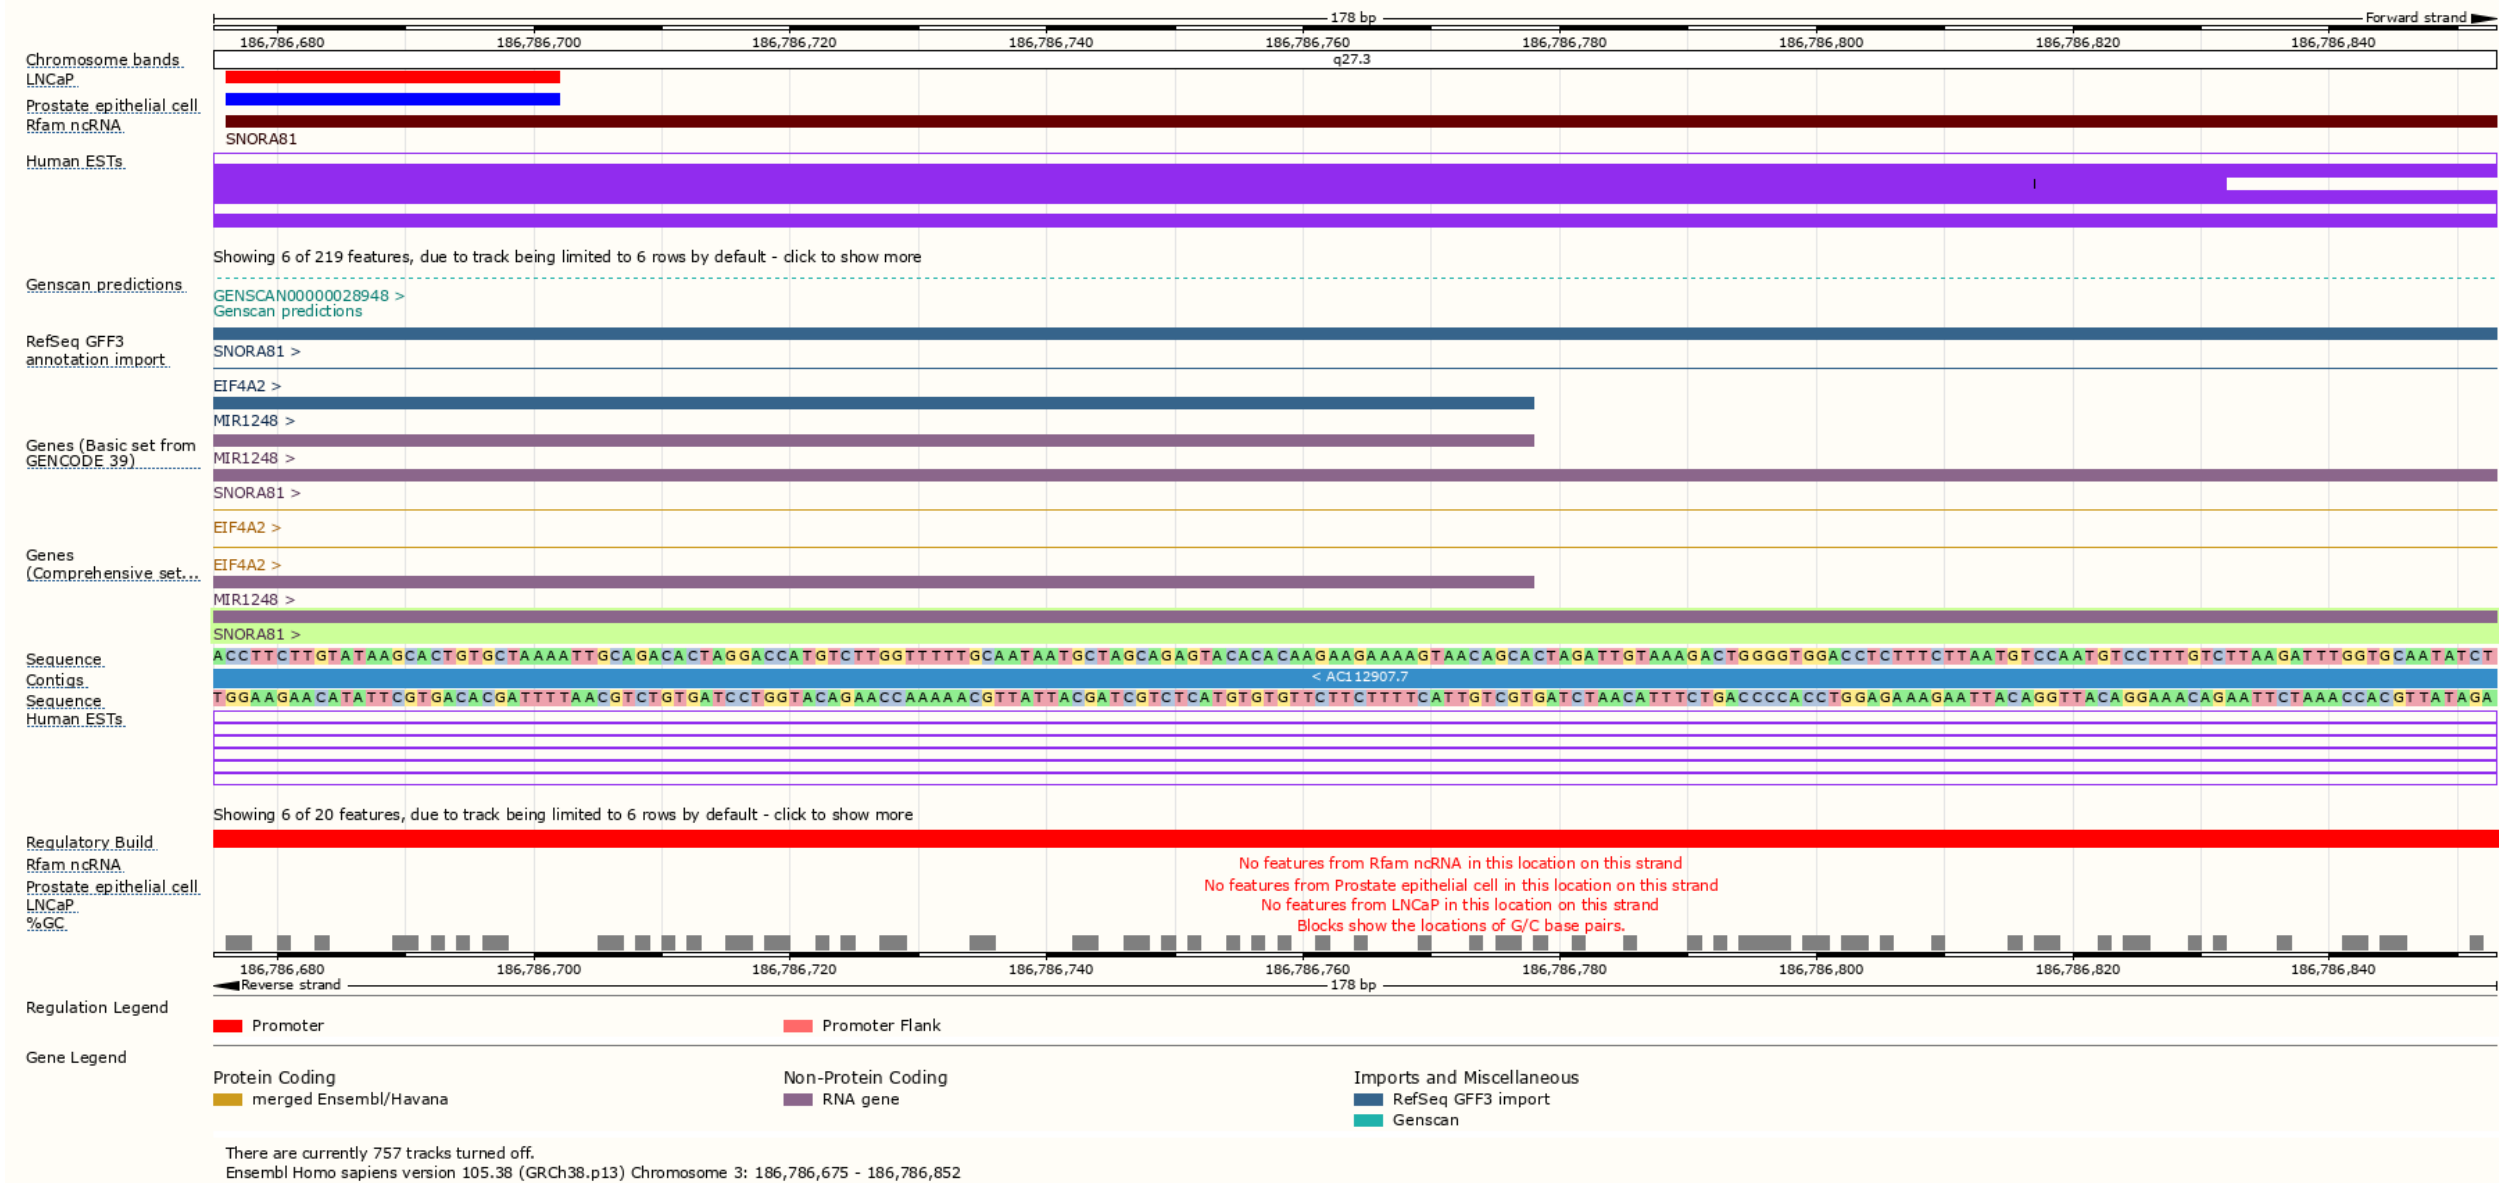

Supplement: s1 [file s1]
