# Supplementary material for: MicroRNA-like snoRNA-Derived RNAs (sdRNAs) Promote Castration-Resistant Prostate Cancer
Source: MDPI journal article supplement (doi:10.3390/cells11081302), 2022-04-12

**Supplementary File S3. SdRNA -D19b and -A24 PC3 cell scratch assays.** Representative migration (wound-healing) assays for PC3 cells transfected with the indicated sdRNA mimic or inhibitor. **(A)** 19 inhibitor.

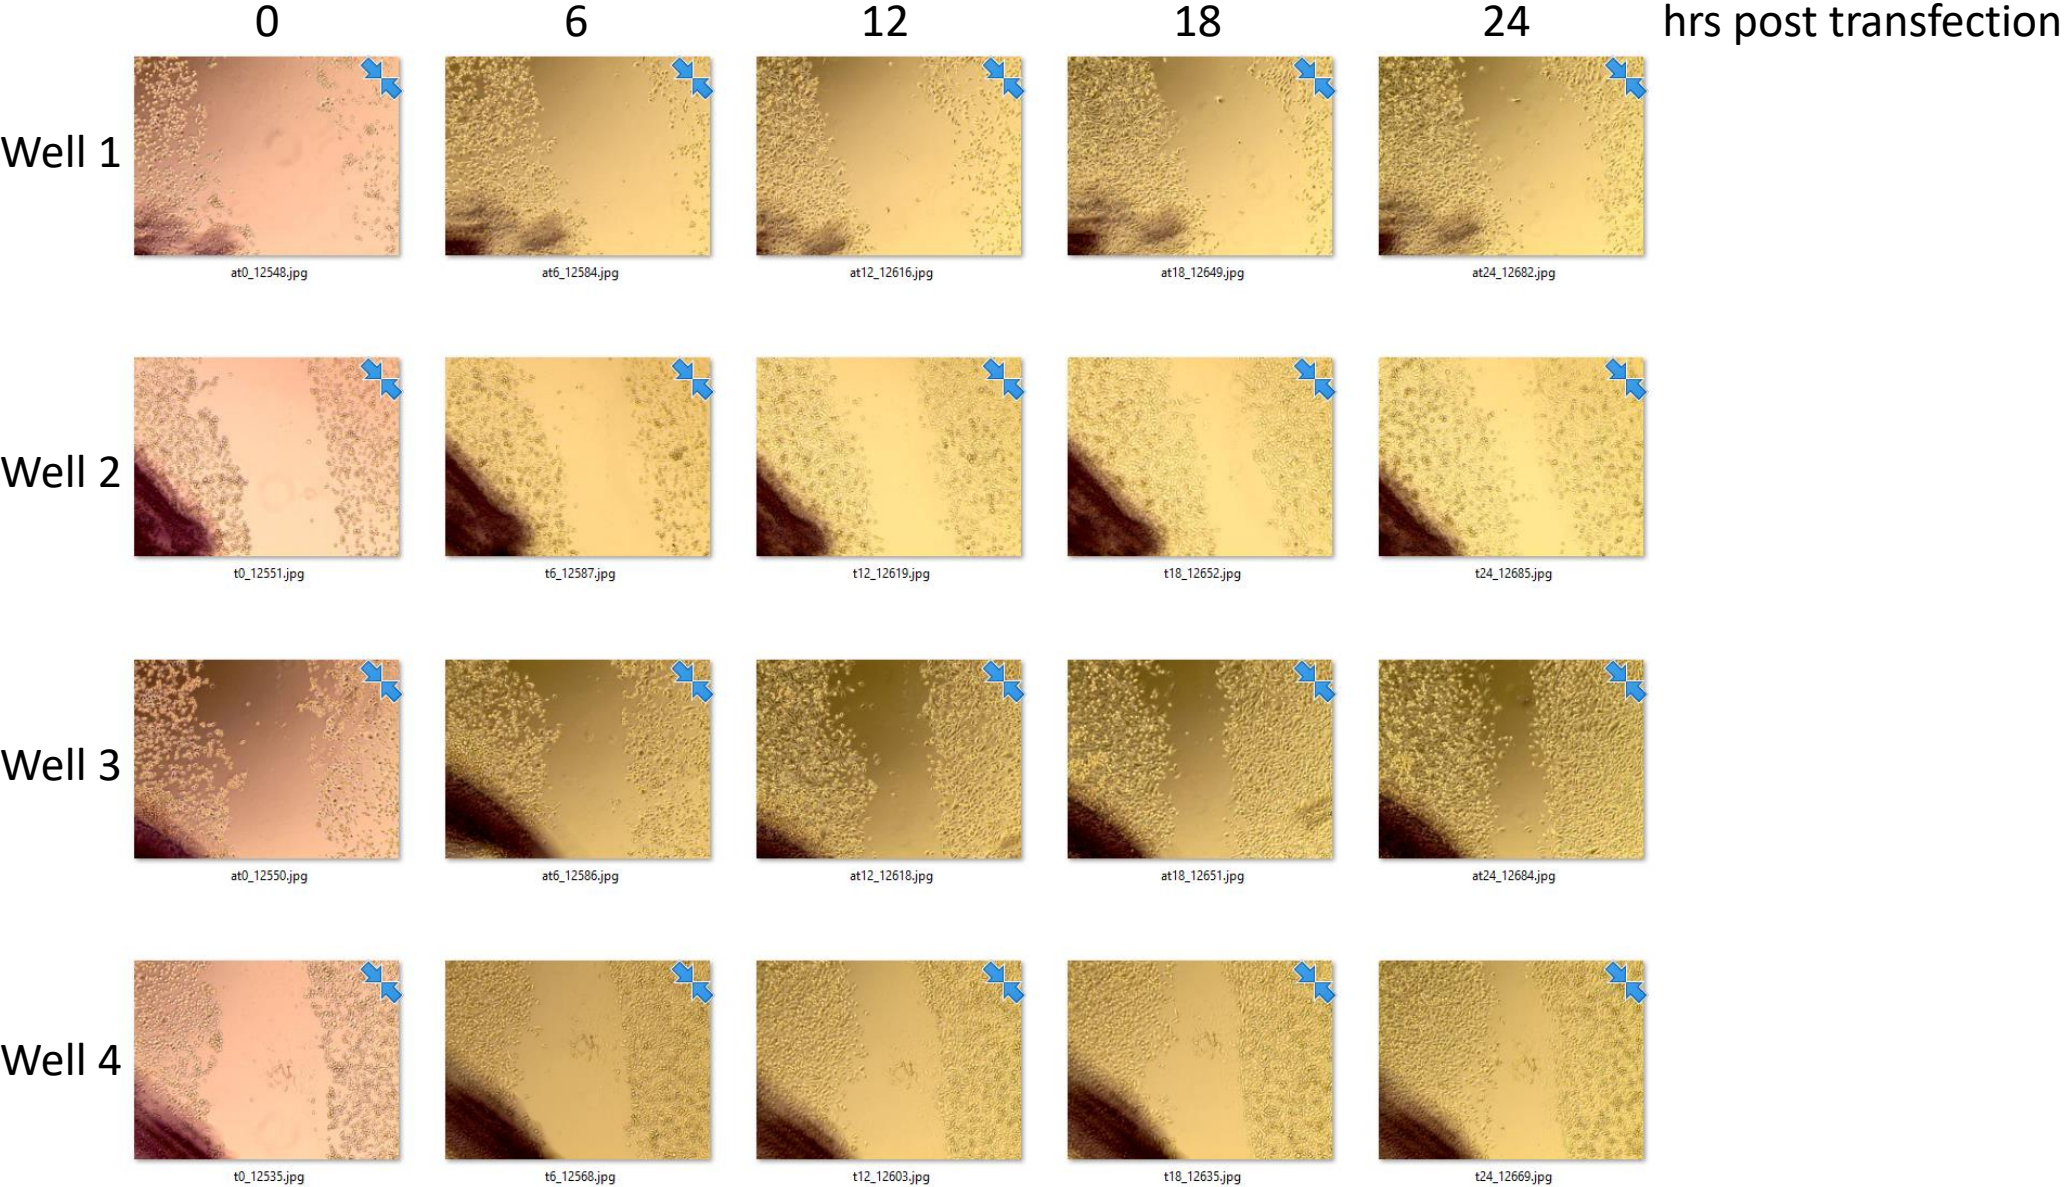

Supplementary File 3. SdRNA -D19b and -A24 PC3 cell scratch assays. (B) 19 mimic.

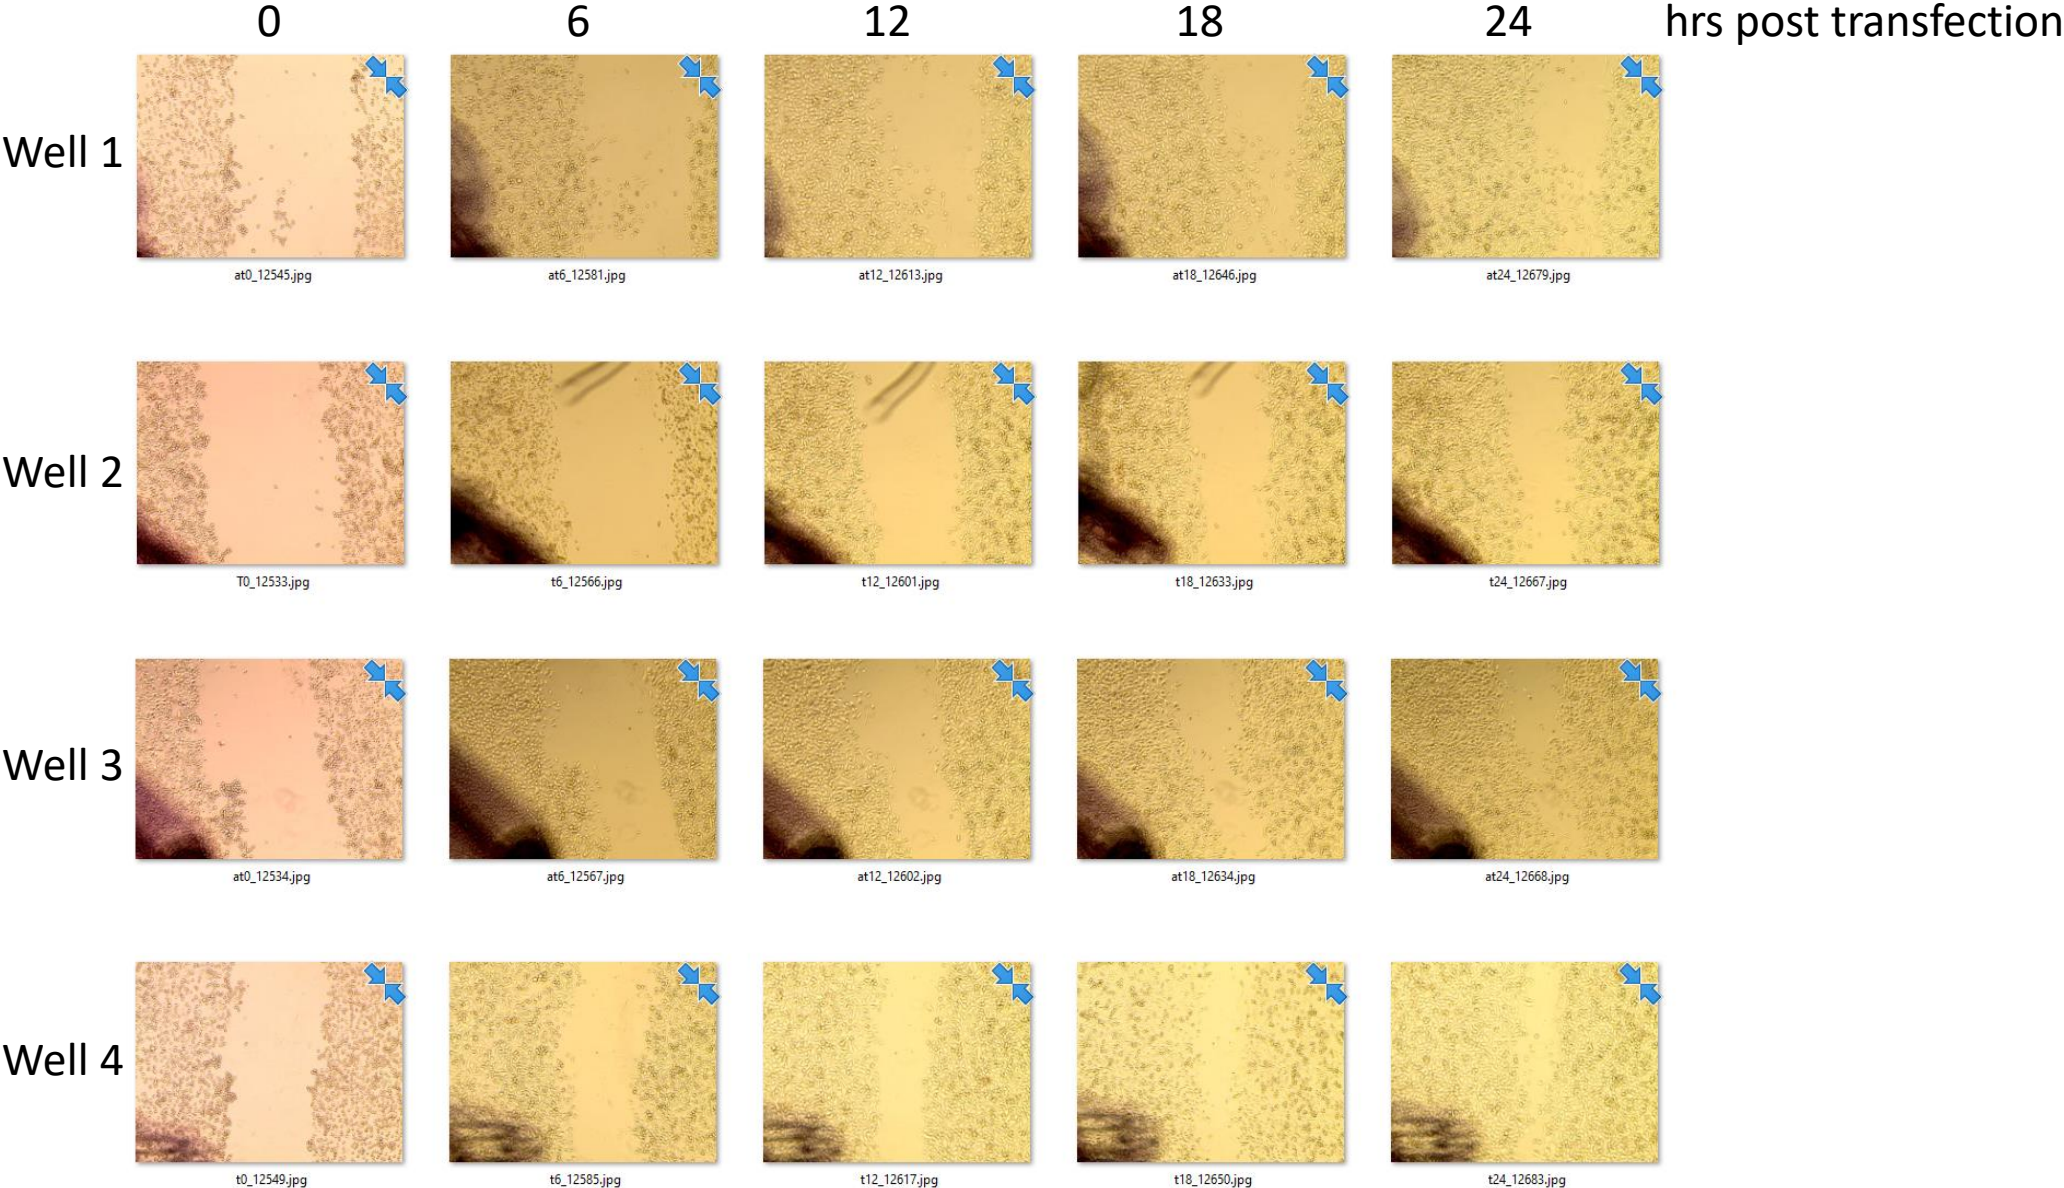



Supplementary File 3. SdRNA -D19b and -A24 PC3 cell scratch assays. (C) 24 inhibitor.

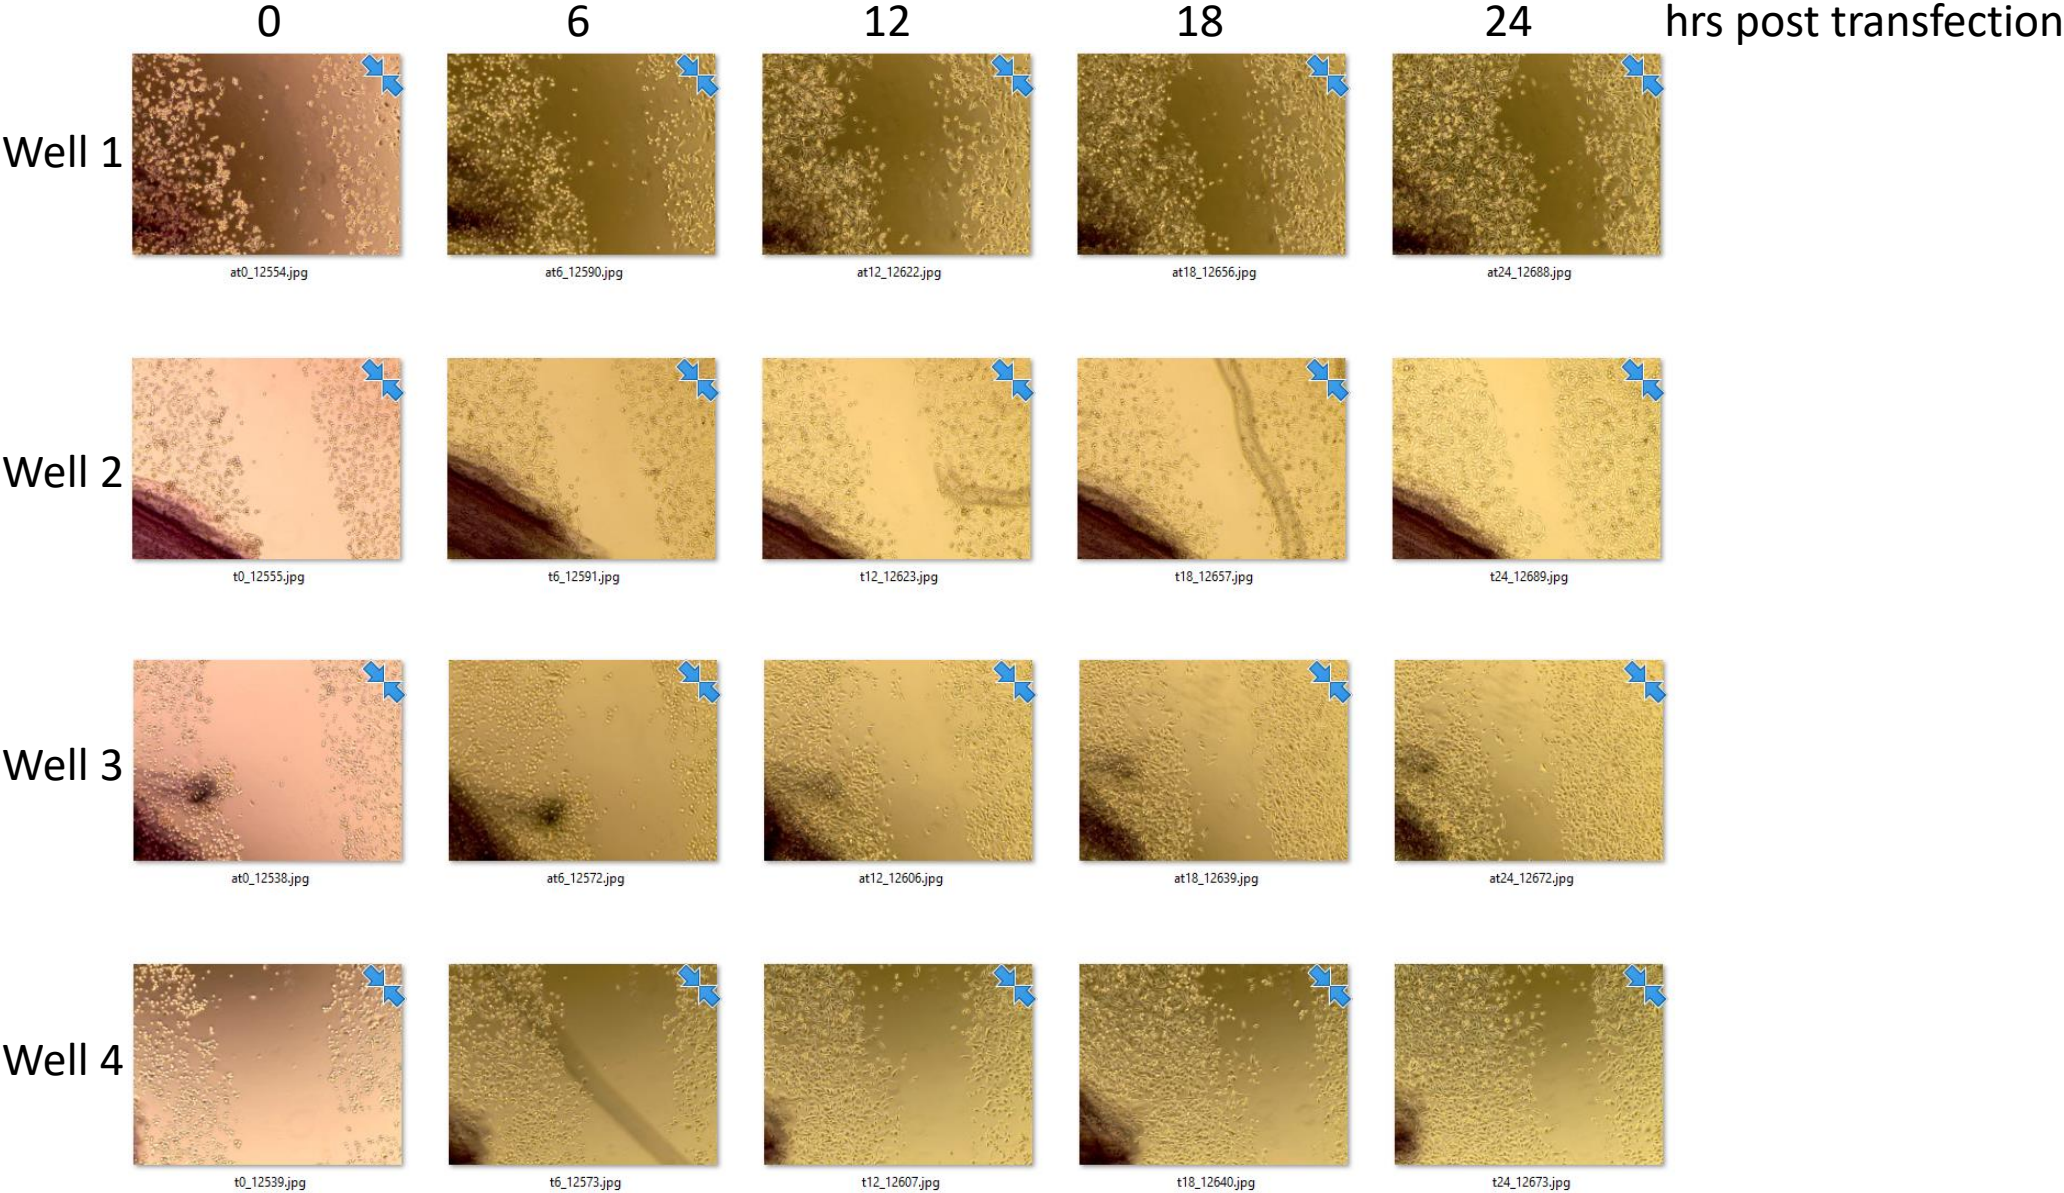

Supplementary File 3. SdRNA -D19b and -A24 PC3 cell scratch assays. (D) 24 mimic.

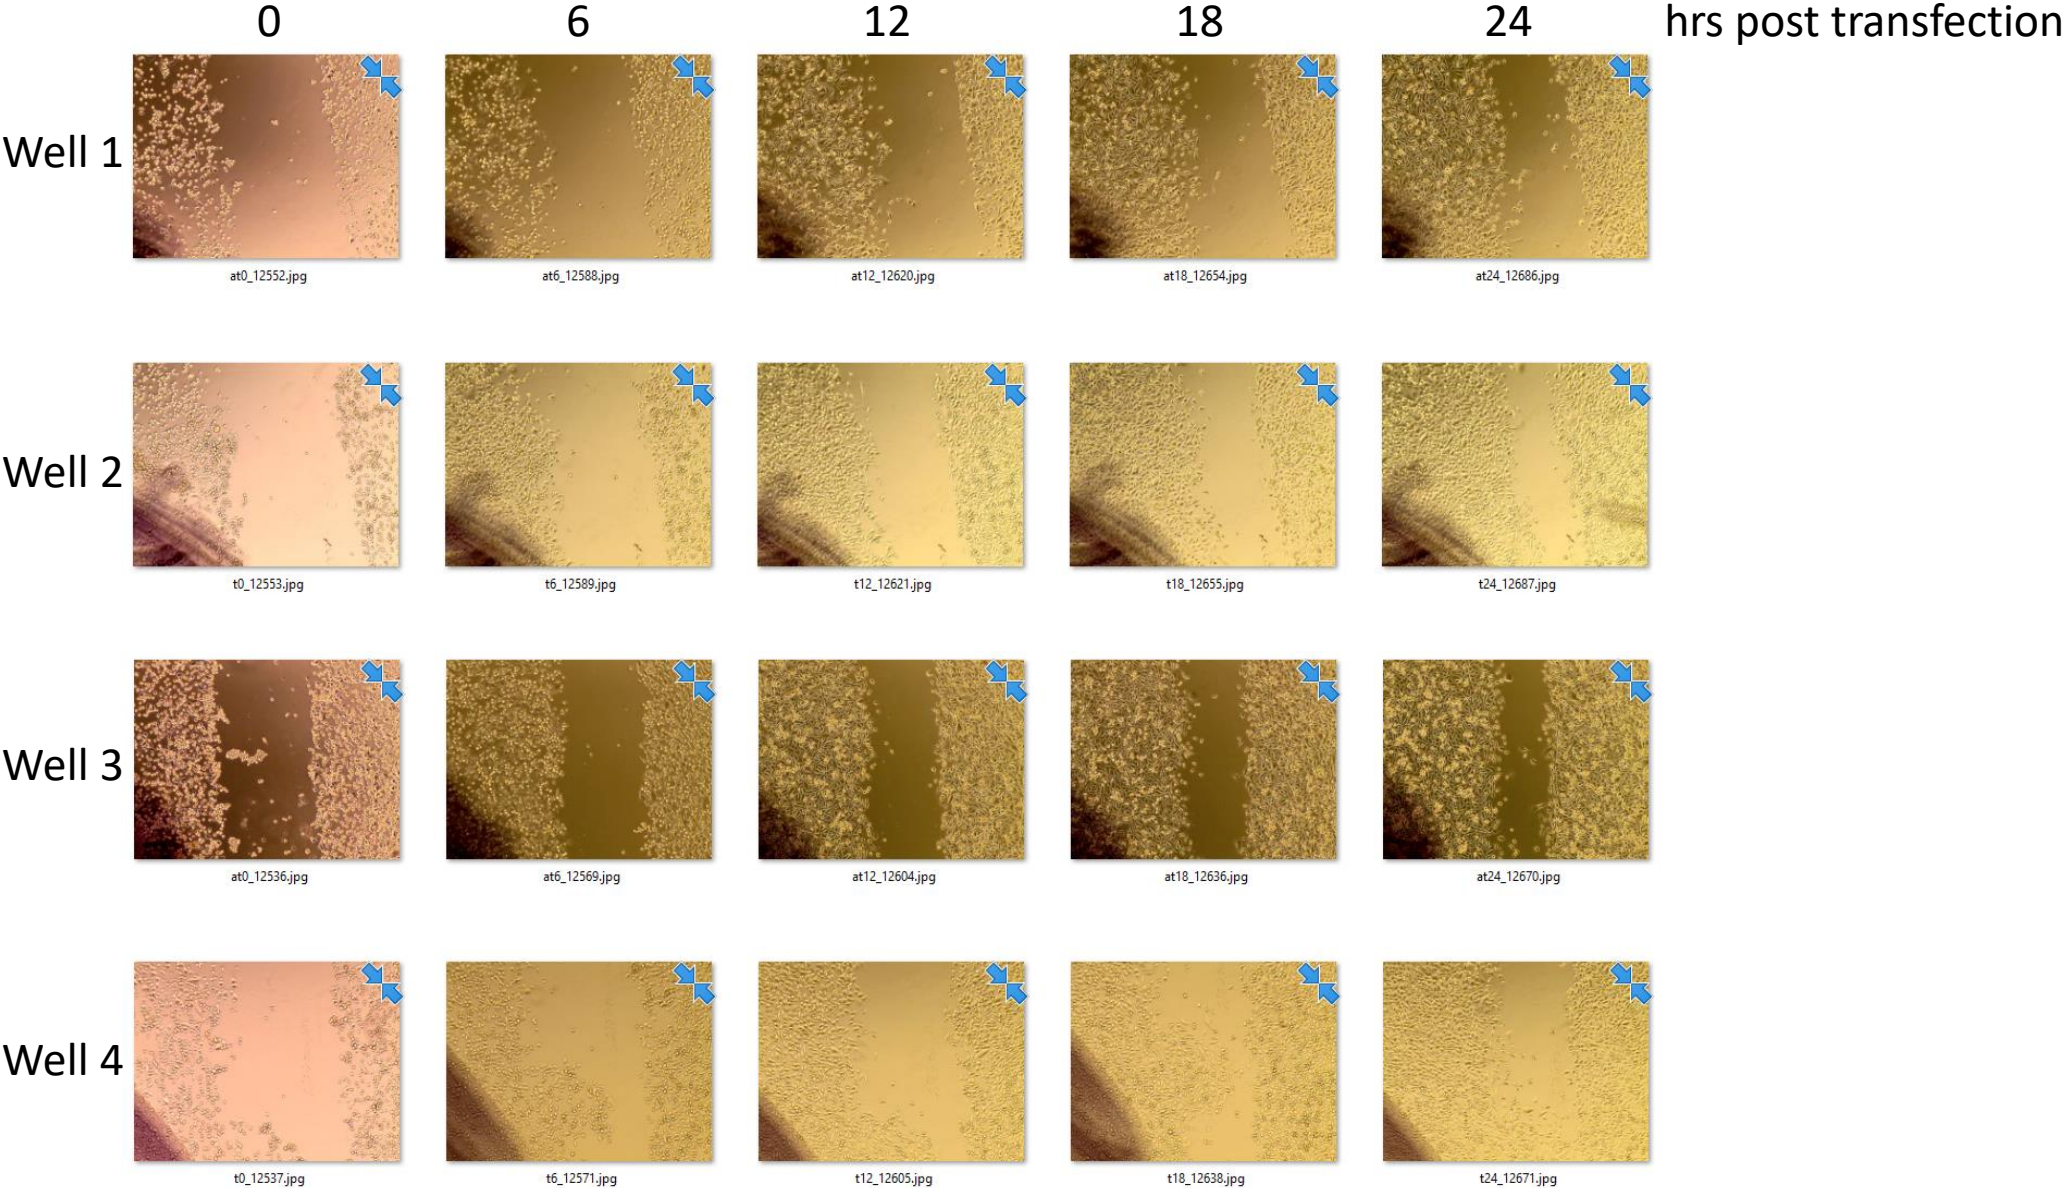



Supplementary File 3. SdRNA -D19b and -A24 PC3 cell scratch assays. (E) 42 inhibitor.

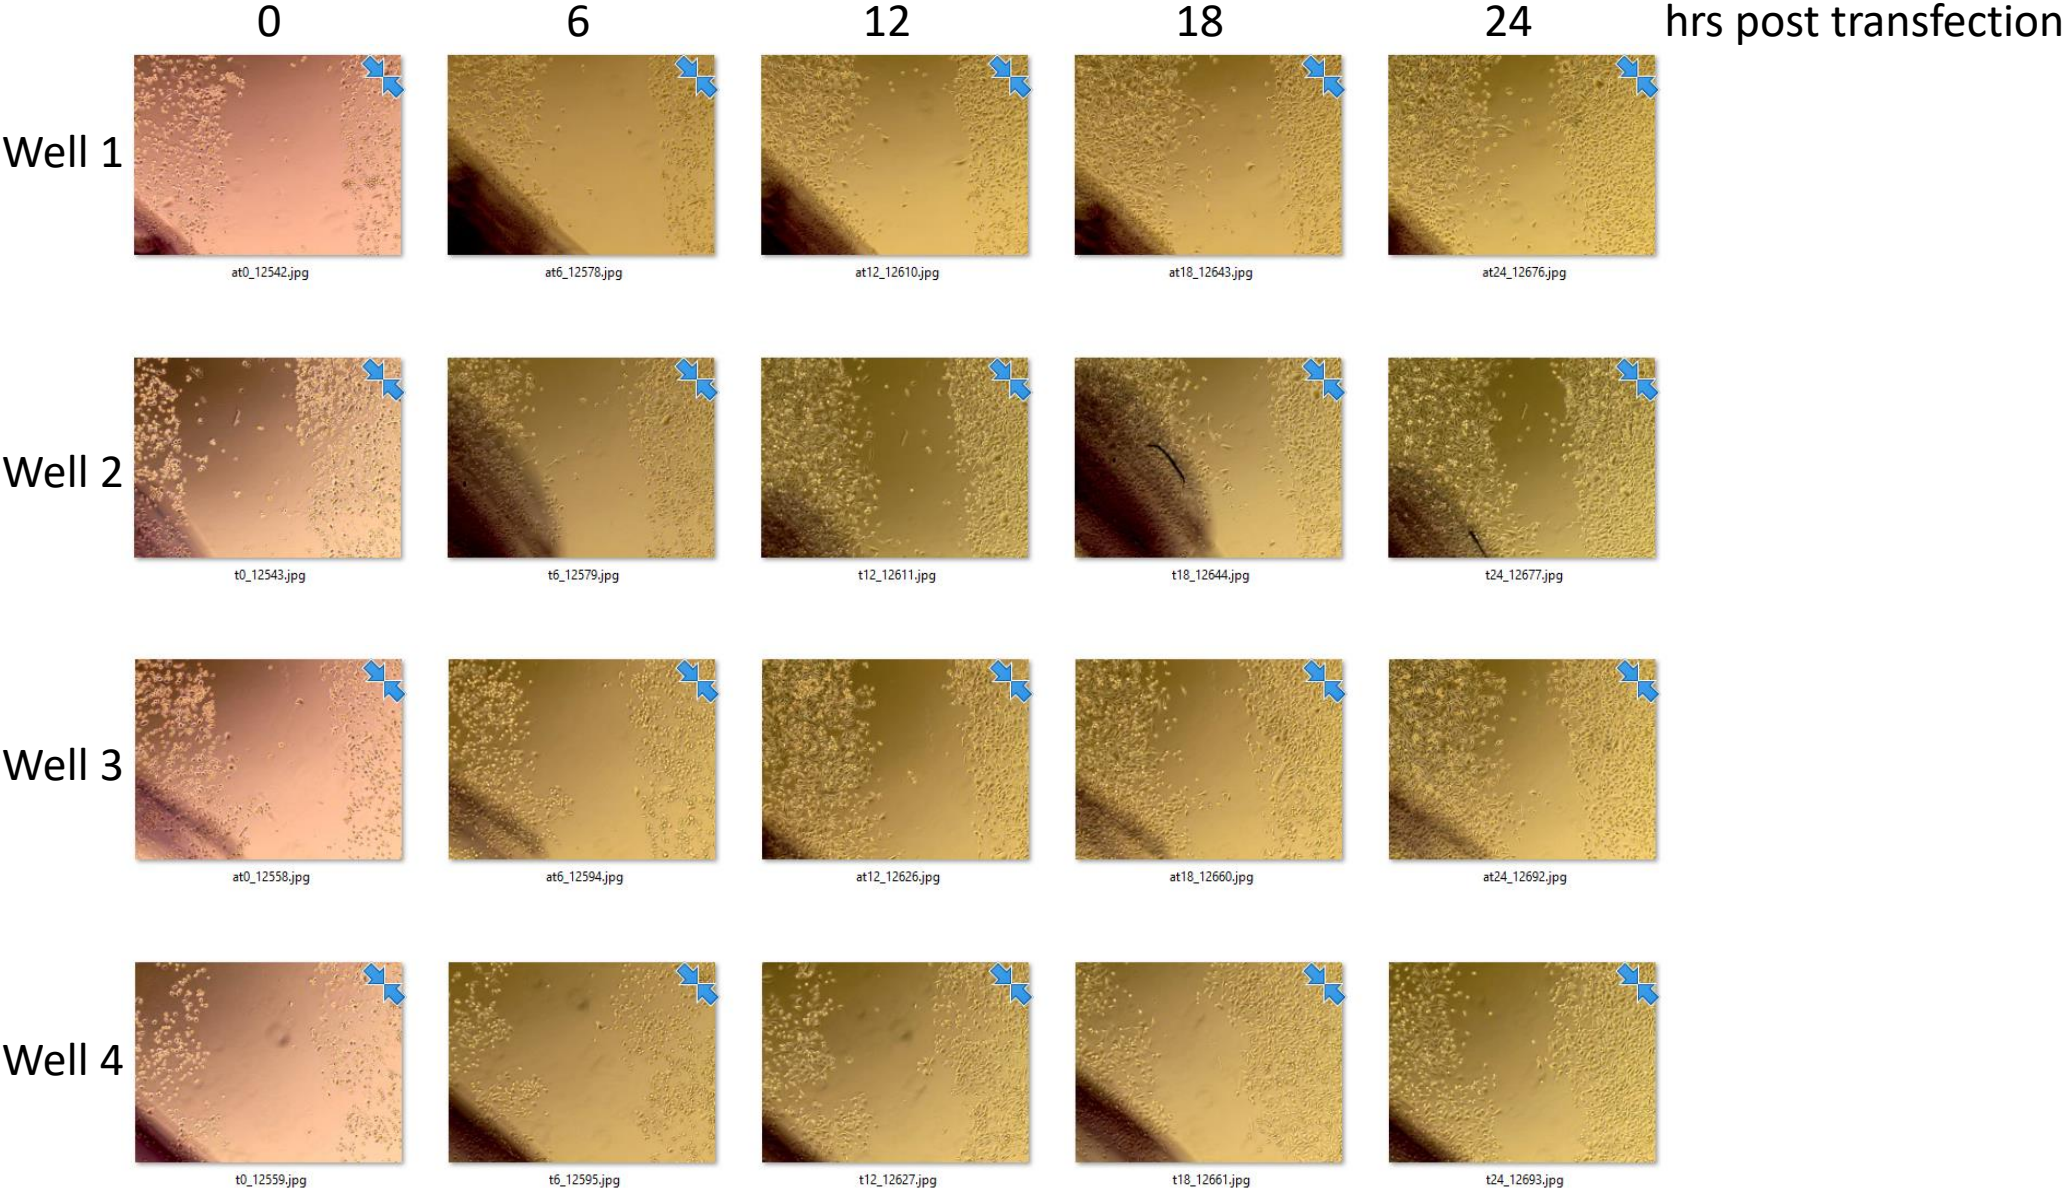

Supplementary File 3. SdRNA -D19b and -A24 PC3 cell scratch assays. (F) 42 mimic.

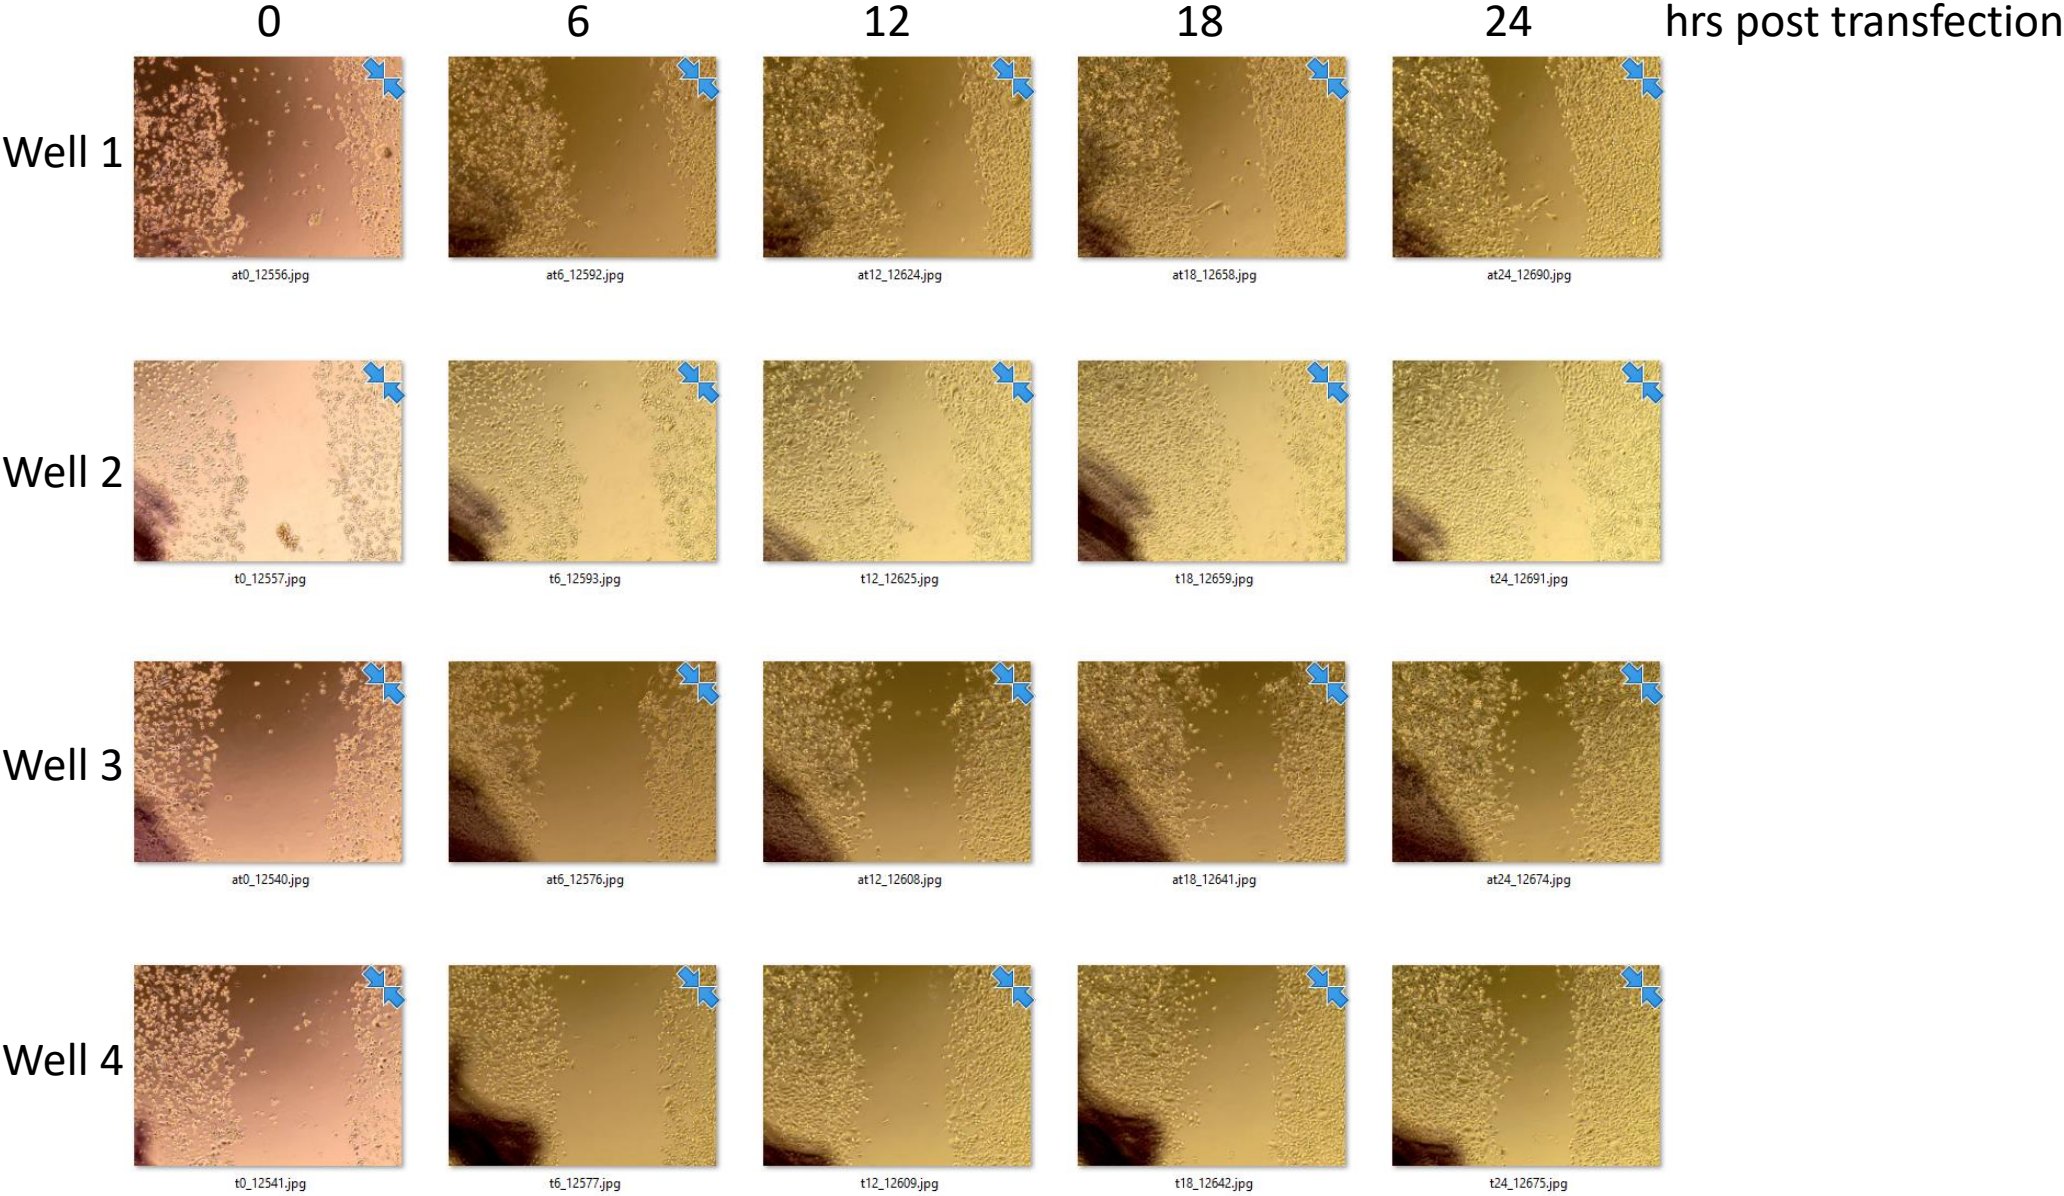



Supplementary File 3. SdRNA -D19b and -A24 PC3 cell scratch assays. (G) Control inhibitor.

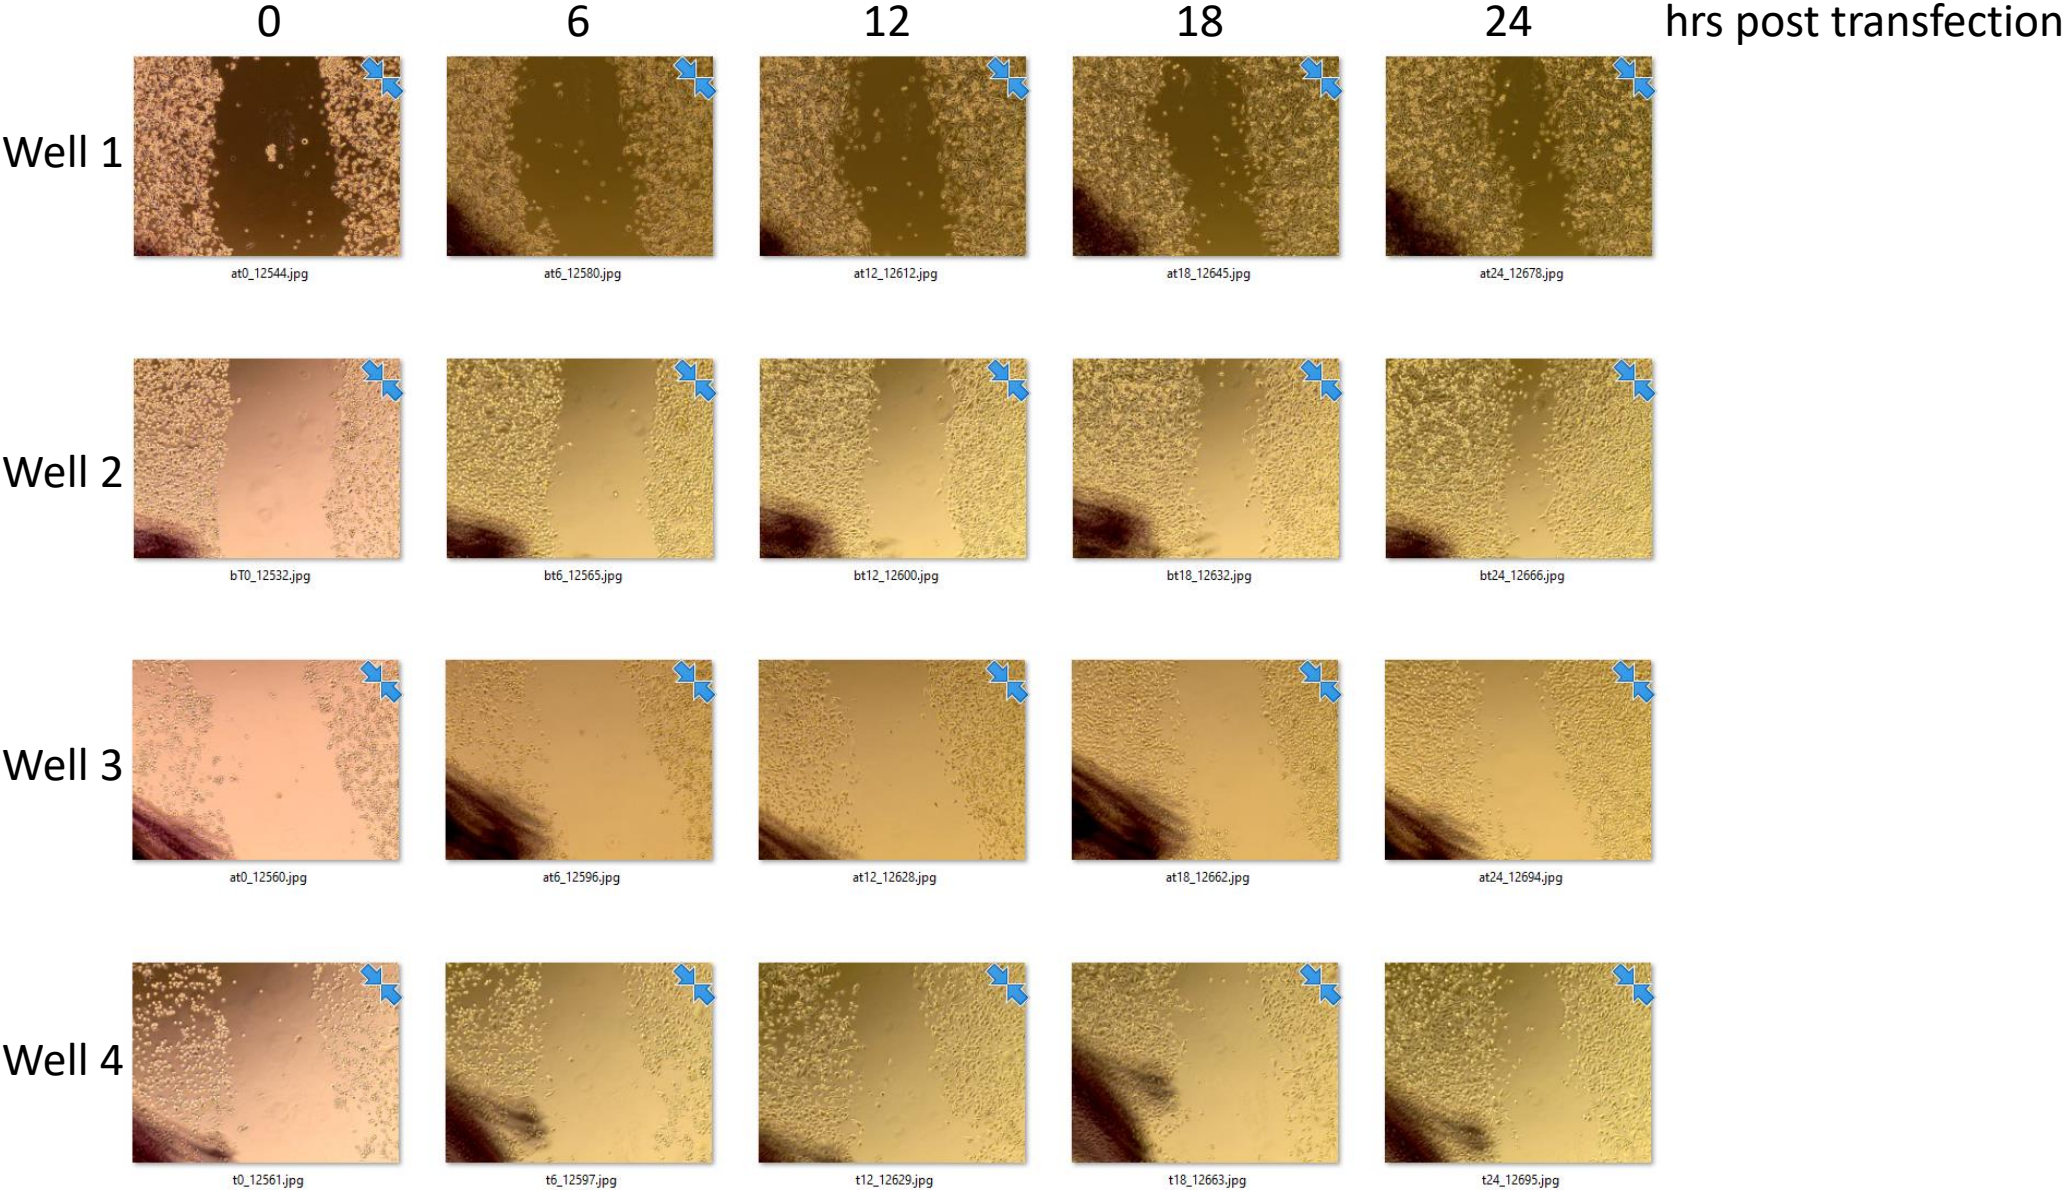

Supplementary File 3. SdRNA -D19b and -A24 PC3 cell scratch assays. (H) Control mimic.

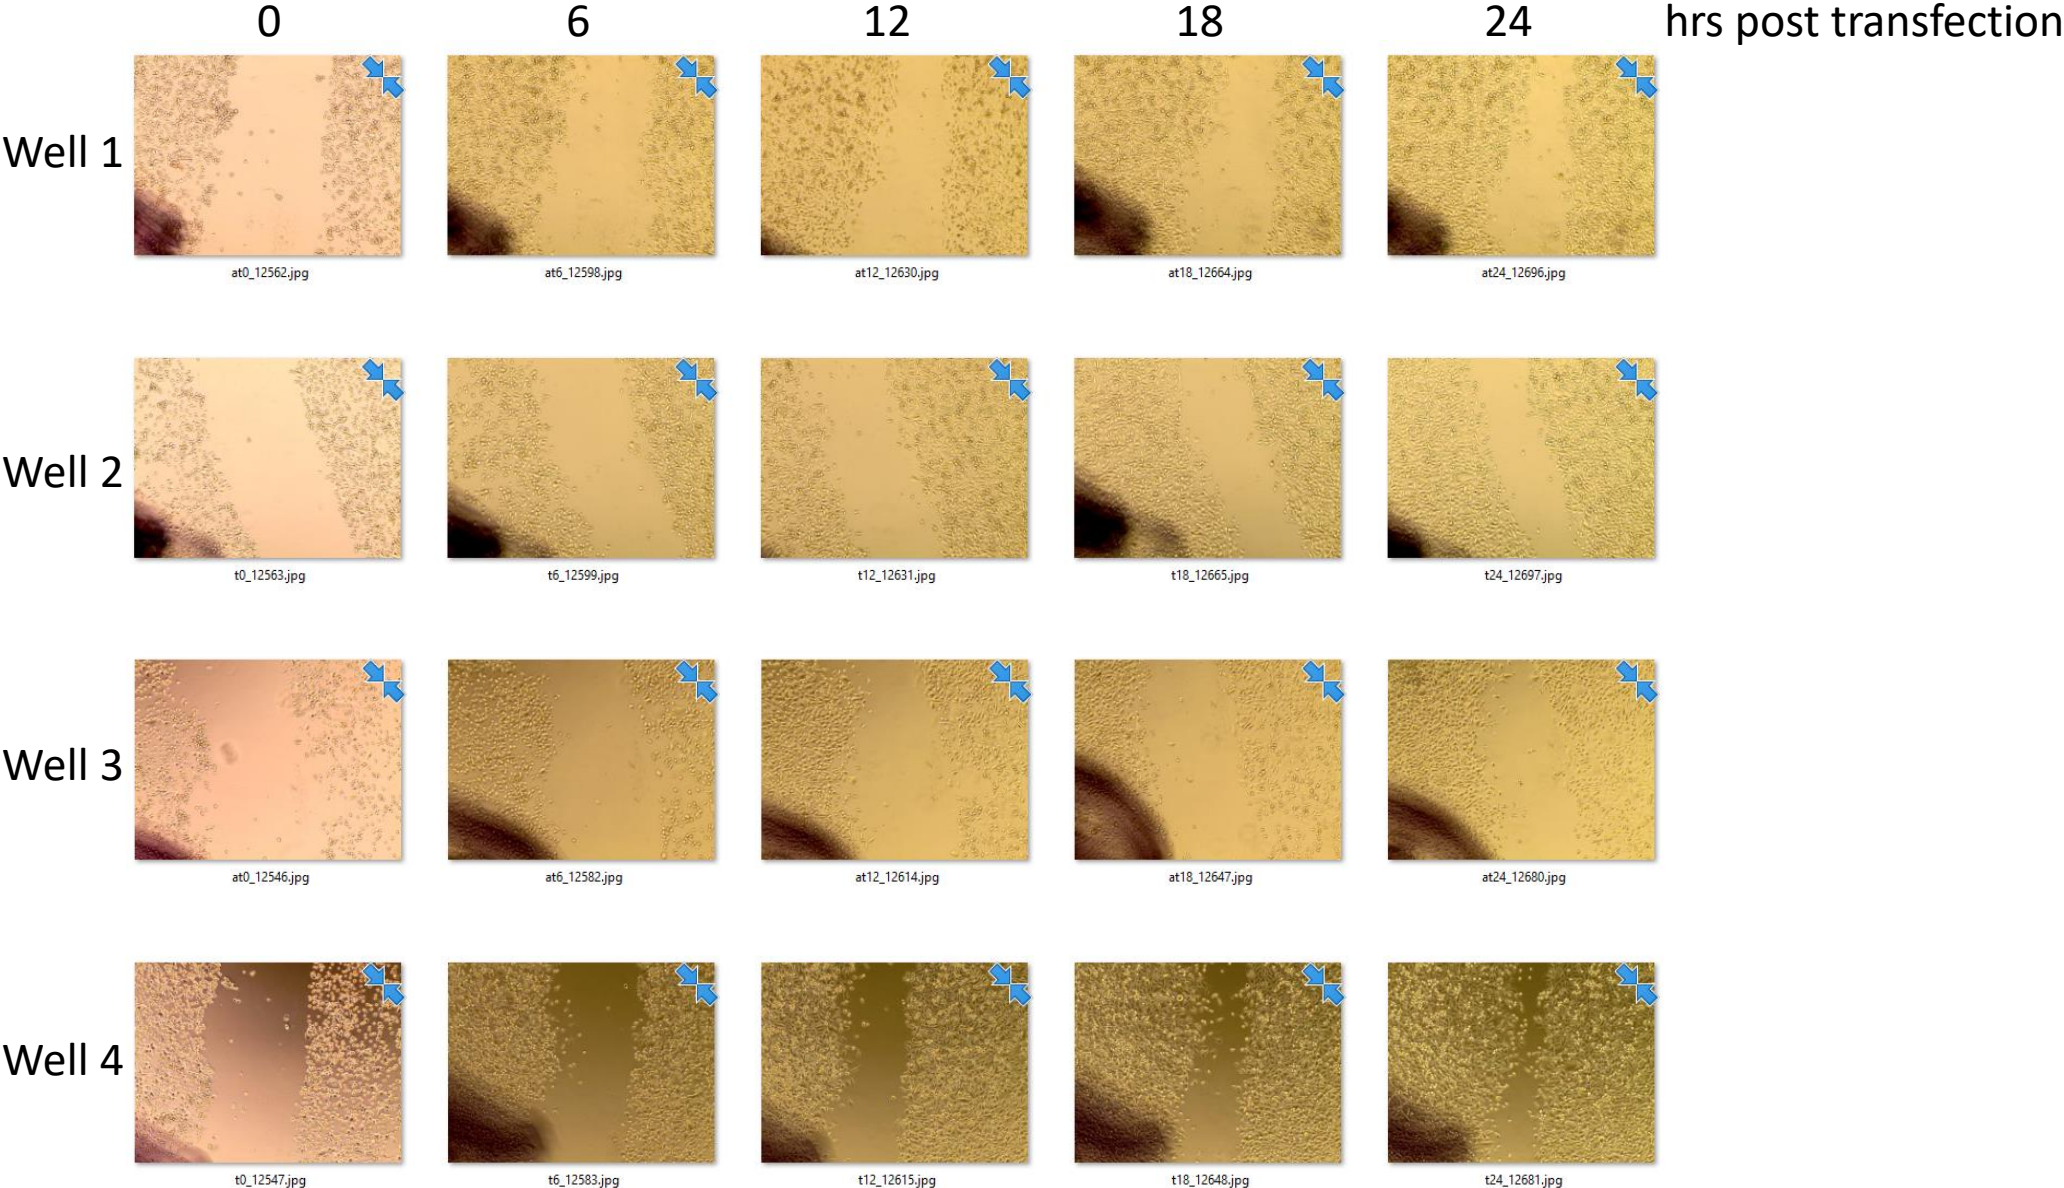



**Supplementary File 3. SdRNA -D19b and -A24 PC3 cell scratch assays. (I) Mock control.**

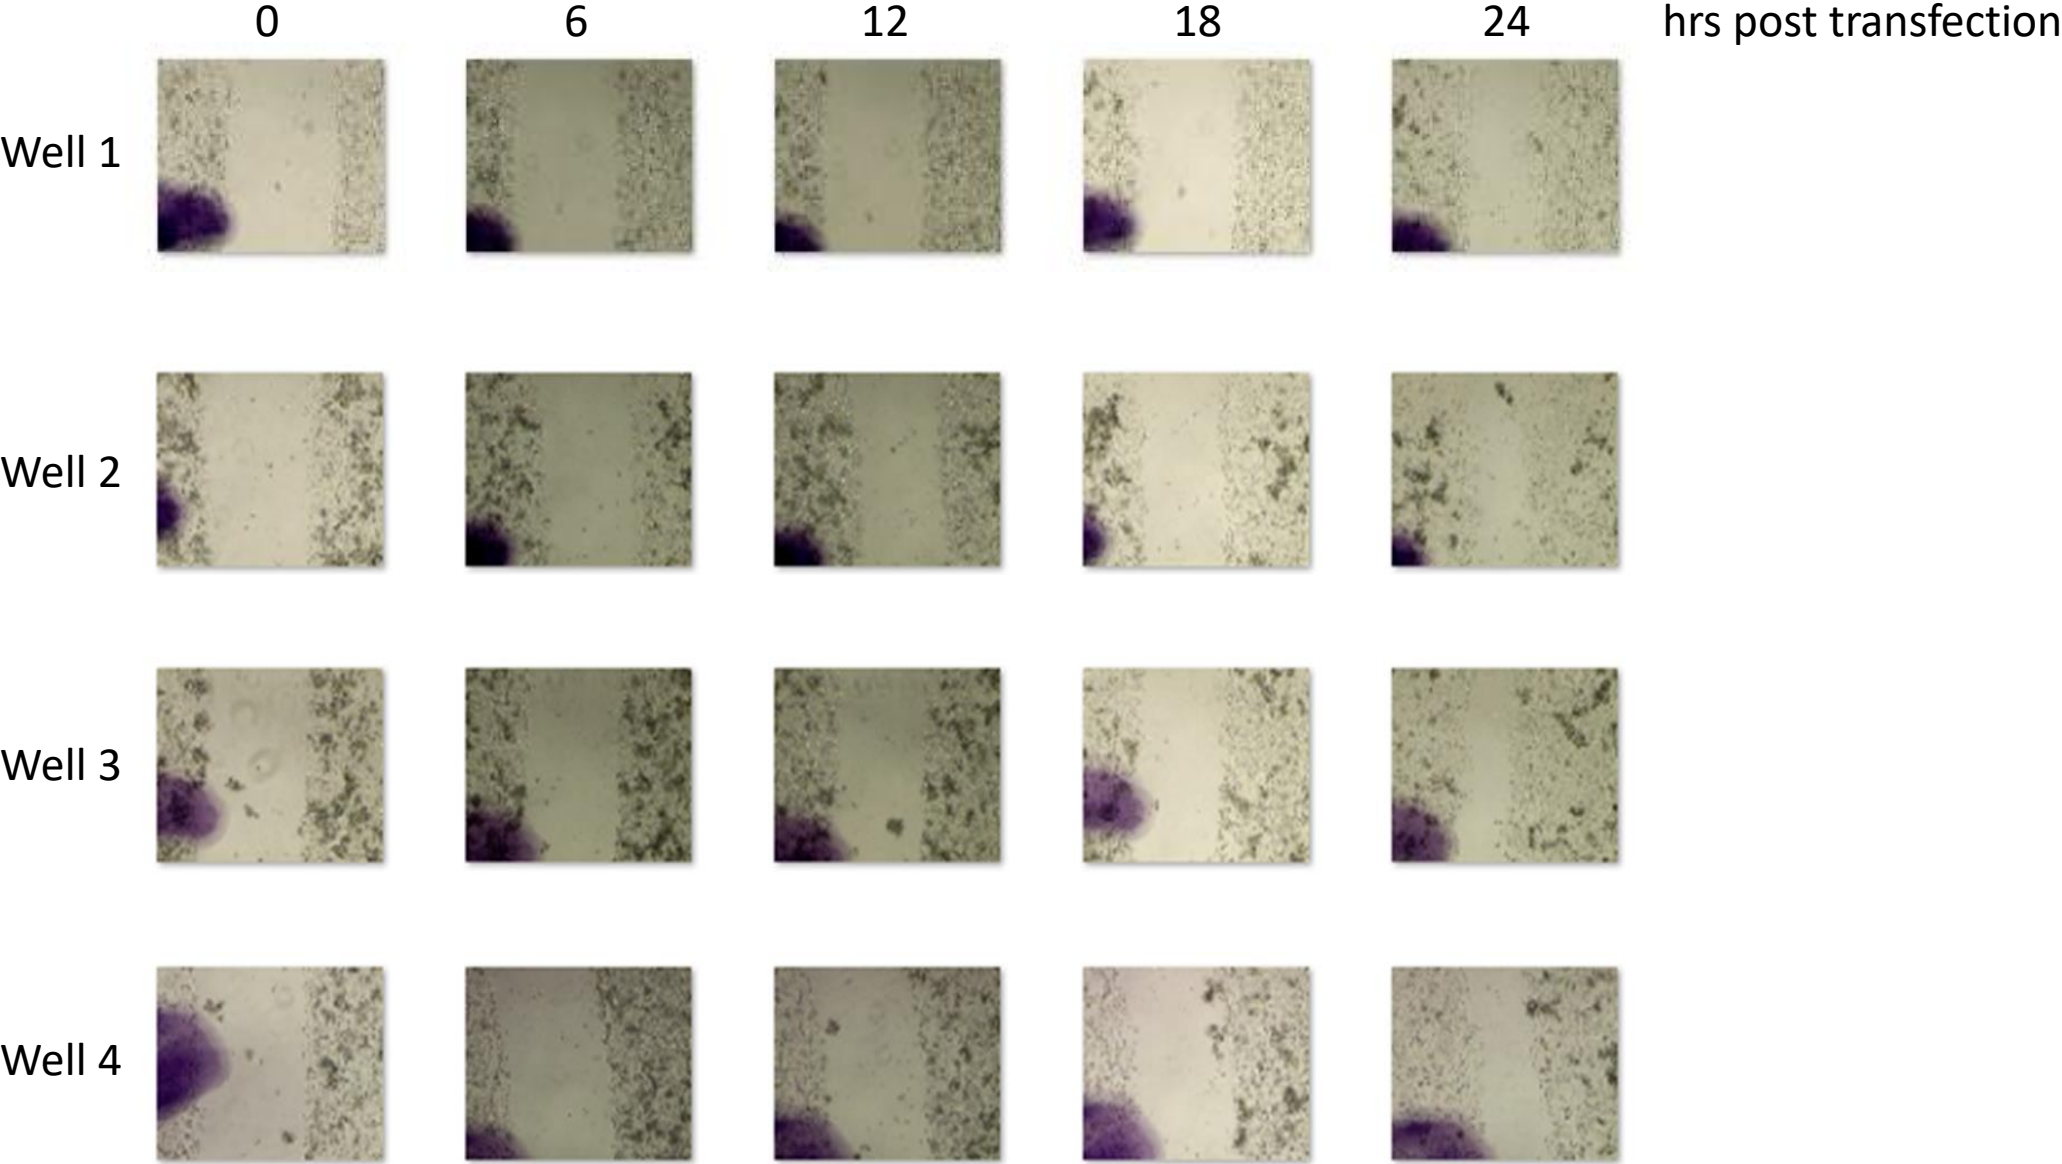

Supplement: s1 [file s1]
