# Supplementary material for: MicroRNA-like snoRNA-Derived RNAs (sdRNAs) Promote Castration-Resistant Prostate Cancer
Source: MDPI journal article supplement (doi:10.3390/cells11081302), 2022-04-12
Supplement: s1 [file s1]

**Mimics** were ordered as custom miRIDIAN miRNA mimics (Horizon Discovery) at 0.015  $\mu$ mol scale. miRIDIAN Mimics are double-stranded RNA oligonucleotides chemically enhanced with the ON-TARGET modification pattern to preferentially program RISC with the active microRNA strand.

**Inhibitors** were ordered as custom IDT miRNA Inhibitors (Integrated DNA Technologies) at 5 nmol scale. IDT miRNA Inhibitors are RNA oligonucleotides comprised of 2'-O-methyl residues that confer increased binding affinity to RNA targets and resistance to endonuclease degradation. ZEN modifications are included to block exonuclease degradation.

**Primers** were ordered as custom DNA oligos (Integrated DNA Technologies) at 25 nmol scale.

CD44 3'UTR TS Forward ACTCGAGACCAAAGTTTTTCATCCTGTCC  
CD44 3'UTR TS Reverse AGCGGCCGCACATCTCTCCTTTAAAGATATTCTAC  
CDK12 3'UTR TS Forward ACTCGAGAcaaaaaacctttcaaacagagc  
CDK12 3'UTR TS Reverse AGCGGCCGCActgttcttcctcacagtatgc  
sdRNA-D19b qRT-PCR GCCCATTACAAGATCCAACCTCTGAT  
sdRNA-A24 qRT-PCR GCTCCATGTATCTTTGGGACCTGTCA  
U6 Forward GCTCGCTTCGGCAGCACATATAC  
U6 Reverse CGCTTCACGAATTTGCGTGTCATCC
