# Supplementary material for: MicroRNA-like snoRNA-Derived RNAs (sdRNAs) Promote Castration-Resistant Prostate Cancer
Source: Cells. 2022 Apr 12;11(8):1302. doi: 10.3390/cells11081302 (PMC9032336; doi:10.3390/cells11081302)
Supplement: Supplementary file 1 [file cells-11-01302-s001.zip]

Archive with 6 entries (6 files):
- Supplementary File S1. Misannotated sdRNAs.pdf
- Supplementary File S2a. SdRNAs in PRAD.xlsx
- Supplementary File S2b. Full TCGA PCa SURFr snoRNA analysis.xlsx
- Supplementary File S3. PC3 scratch assays NEW.pdf
- Supplementary File S4. SdRNA-D19b and -A24 complementary mRNAs for pdf with targets.xlsx
- Supplementary File S5. Oligonucleotide master list.pdf
