# Supplementary material for: MicroRNA-like snoRNA-Derived RNAs (sdRNAs) Promote Castration-Resistant Prostate Cancer
Source: Cells. 2022 Apr 12;11(8):1302. doi: 10.3390/cells11081302 (PMC9032336; doi:10.3390/cells11081302)
Supplement: Supplementary file 1 [file cells-11-01302-s001.zip › Supplementary File S2a. SdRNAs in PRAD.xlsx]

## Sheet: PRAD_sdRNA_table 
Supplementary File S2. TCGA PRAD tumor sample SURFR snoRNA analysis. (A) 38 SURFR-identified sdRNAs significantly differentially expressed in TCGA PRAD tumor samples as compared to control prostate tissues. All samples were acquired from The Cancer Genome Atlas (TCGA) Research network PRAD dataset and are publicly available at https://www.cancer.gov/tcga. SURFR analysis of TCGA PRAD and normal pr…
Ensembl Gene ID	SnoRNA	Start Position	Stop Position	Length	Cancer Average Reads per Million (RPM)	Cancer File Count (/489)	% Cancer File Expression	Control Average Reads per Million (RPM)	Control File Count (/52)	% Control File Expression	Cancer/Control Fold Change	% Cancer File - % Control File Expressions	Sequence (5' to 3')
ENSG00000206754	SNORD101	3	26	24	185.38	444	90.7975	< 30*	0	0	6.16667	90.7975	UUGAAUGAUGACUUUAAUUGUCGG
ENSG00000275043	SNORD25	43	65	23	1311.68	470	96.1145	234.67	42	80.7692	5.58947	15.3453	CGUGAGGAUAAAUAACUCUGAGG
ENSG00000199753	SNORD104	45	70	26	10102.4	489	100	1896.21	52	100	5.32766	0	CGGGUGAUGCGAACUGGAGUCUGAGC
ENSG00000201823	SNORD48	38	61	24	774.21	282	57.6687	149.5	14	26.9231	5.17866	30.7456	UGAUGCCAUCACCGCAGCGCUCUG
ENSG00000264549	SNORD95	39	62	24	1622.88	448	91.6155	332.5	52	100	4.88084	-8.38446	UGCUGAAAUCCAGAGGCUGUUUCU
ENSG00000275994	SNORA24	1	25	25	710.71	477	97.546	149.62	16	30.7692	4.7501	66.7768	CUCCAUGUAUCUUUGGGACCUGUCA
ENSG00000207280	SNORD20	2	24	23	627.98	486	99.3865	136.27	26	50	4.60835	49.3865	GGAUAUGAUGACUGAUUACCUGA
ENSG00000283551	SNORD98	40	64	25	1874.05	488	99.7955	428.4	52	100	4.37453	-0.204499	GCAGUGUGGAACACAAUGAACUGAA
ENSG00000275996	SNORD27	2	22	21	598.42	267	54.6012	143.74	23	44.2308	4.16321	10.3705	CUCCAUGAUGAACACAAAAUG
ENSG00000275996	SNORD27	47	68	22	1232.99	483	98.773	304.73	52	100	4.04617	-1.22699	GUGAUGUCAUCUUACUACUGAG
ENSG00000276314	SNORD107	2	29	28	128.75	255	52.1472	34	3	5.76923	3.78676	46.378	GUUCAUGAUGACACAGGACCUUGUCUGA
ENSG00000199477	SNORA31	2	24	23	1470.06	393	80.3681	395.38	16	30.7692	3.71809	49.5989	UGCAUCCACUGAUAGACCUUGAA
ENSG00000212452	SNORD69	26	48	23	478.91	362	74.0286	128.9	10	19.2308	3.71536	54.7979	GGAUCUGACUGACUGUGCUGAGU
ENSG00000226572	SNORD57	2	25	24	420.34	469	95.91	113.3	23	44.2308	3.70997	51.6793	GGAGGUGAUGAACUGUCUGAGCCU
ENSG00000206630	SNORD60	2	26	25	1350.27	489	100	375.61	49	94.2308	3.59487	5.76923	GUCUGUGAUGAAUUGCUUUGACUUC
ENSG00000206622	SNORA69	112	131	20	336.29	346	70.7566	98.2	5	9.61538	3.42454	61.1413	GACAGAUUGACAUGGACAAU
ENSG00000281859	SNORD38B	46	65	20	101.7	414	84.6626	< 30*	0	0	3.4	84.6626	GAAGAUAAAGUGUGUCUGAG
ENSG00000221539	SNORD99	49	68	20	415.26	371	75.8691	131.33	3	5.76923	3.16196	70.0999	AUGCGGAUAUGGGACUGAGA
ENSG00000238917	SNORD10	121	140	20	363.73	416	85.0716	118.69	13	25	3.06454	60.0716	UCAGUCUUUGUACUCUGAGA
ENSG00000221116	SNORD110	53	73	21	299.14	449	91.82	99.73	15	28.8462	2.9995	62.9739	GAUGUCUCCAUGUCUCUGAGC
ENSG00000235408	SNORA71B	141	160	20	277.26	280	57.2597	92.6	5	9.61538	2.99417	47.6443	UCUGGAGCUUUCGUACAUGC
ENSG00000263934	SNORD3A	196	215	20	3494.02	484	98.9775	1205.42	43	82.6923	2.89859	16.2852	GAGAGAACGCGGUCUGAGUG
ENSG00000206979	SNORD61	52	71	20	214.85	260	53.1697	76.6	5	9.61538	2.80483	43.5543	UCCUCUAAGAAGUUCUGAGC
ENSG00000202031	SNORD38A	1	19	19	498.56	489	100	184.7	46	88.4615	2.6993	11.5385	UCUCGUGAUGAAAACUCUG
ENSG00000239039	SNORD13	83	104	22	252.47	325	66.4622	94.43	7	13.4615	2.67362	53.0006	UGGGCACAUUACCCGUCUGACC
ENSG00000206989	SNORD63	40	61	22	293.26	480	98.1595	109.73	45	86.5385	2.67256	11.621	AACGUGUGGAAAACUAAUGACU
ENSG00000239043	SNORD127	5	27	23	216.5	264	53.9877	84	2	3.84615	2.57738	50.1416	AACUGUGAUGAAAGAUUUGGUCU
ENSG00000266300	SNORD52	38	64	27	275.96	362	74.0286	109	4	7.69231	2.53174	66.3363	GGUCAUGAUGUCAAAACUAAGUUCUGA
ENSG00000263764	SNORD43	2	22	21	394.74	484	98.9775	156.75	40	76.9231	2.51828	22.0544	ACAGAUGAUGAACUUAUUGAC
ENSG00000238942	SNORD2	31	52	22	284.67	374	76.4826	115	48	92.3077	2.47539	-15.8251	CUGACCUGAAAUGAAGAGAAUA
ENSG00000264591	SNORD84	39	66	28	638.05	417	85.2761	260.09	35	67.3077	2.45319	17.9684	CGCAGUGAUGACCCUCAUCUAUCACCCU
ENSG00000249020	SNORA58	114	134	21	254.36	378	77.3006	107.55	11	21.1538	2.36504	56.1468	AUUGCAGGACUCUAAACAUUU
ENSG00000238862	SNORD19B	55	73	19	384.18	448	91.6155	162.95	22	42.3077	2.35766	49.3078	UACAAGAUCCAACUCUGAU
ENSG00000238649	SNORD42A	41	60	20	280.94	425	86.9121	123.62	13	25	2.27261	61.9121	UGAACAAAGGAACCACUGAA
ENSG00000207031	SNORD59A	50	71	22	164.35	414	84.6626	73	24	46.1538	2.25137	38.5087	GAAGCCACAUUUAGGUACUGAG
ENSG00000206656	SNORD116-17	72	91	20	638.93	324	66.2577	285.83	6	11.5385	2.23535	54.7192	AUCCUCGUCGAACUGAGGUC
ENSG00000206680	SNORD21	71	90	20	373.8	466	95.2965	174.8	44	84.6154	2.13844	10.6811	GUUUCAAGACGGGACUGAUG
ENSG00000212447	SNORD90	79	97	19	872.3	390	79.7546	416.16	25	48.0769	2.09607	31.6777	CCUACUGUGGAAUCUGAAG
