# Supplementary material for: MicroRNA-like snoRNA-Derived RNAs (sdRNAs) Promote Castration-Resistant Prostate Cancer
Source: Cells. 2022 Apr 12;11(8):1302. doi: 10.3390/cells11081302 (PMC9032336; doi:10.3390/cells11081302)
Supplement: Supplementary file 1 [file cells-11-01302-s001.zip › Supplementary File S2b. Full TCGA PCa SURFr snoRNA analysis.xlsx]

## Sheet: Sheet1
Supplementary File 2. TCGA PRAD tumor sample SURFR snoRNA analysis. (B) Full TCGA PCa SURFr snoRNA analysis.			patient number ->	1	2	3	4	5	6	7	9	10	11	13	14	15	16	17	18	19	20	21	22	23	24	25	26	27	28	29	30	32	33	39	40	42	44	46	47	48	50	51	52	53	56	57	60	61	62
snoRNA	Ensemble ID	Sequence	PCa Class->	8140	8140	8140	8140	8140	8140	8140	8140	8140	8140	8140	8140	8140	8140	8140	8140	8140	8140	8140	8140	8140	8140	8140	8140	8140	8140	8140	8140	8140	8140	8140	8140	8140	8140	8140	8140	8140	8140	8140	8140	8140	8140	8140	8140	8140	8140
SNORA24	ENSG00000275994	CTCCATGTATCTTTGGGACCTGTCA		593	645	788	769	181	97	117	233	260	333	1432	155	324	239	750	625	131	237	185	598	199	393	144	572	607	500	167	470	212	935	107	173	207	217	0	141	166	354	338	544	4955	1009	174	91	507	837
SNORD19B	ENSG00000238862	ATTACAAGATCCAACTCTGAT		120	694	915	470	0	192	200	137	307	140	1081	322	144	214	1205	839	100	109	0	963	102	165	183	444	307	226	394	616	217	182	208	248	451	158	143	297	237	572	366	133	361	105	136	187	358	255
SNORD52	ENSG00000265707	GGTCATGATGTCAAAACTAAGTTCTG		280	109	105	235	0	0	0	0	0	0	204	0	0	0	115	129	0	138	0	118	0	0	0	140	136	0	0	290	0	0	0	0	179	0	0	0	0	350	161	306	2011	281	0	0	112	245
SNORD69	ENSG00000212452	GCAAATGATGATAAACTGGATCTGACTGACTGTGCTGAGTC		286	387	370	657	149	136	155	312	176	141	402	154	106	202	387	351	112	236	89	301	160	266	210	352	365	298	0	705	235	298	127	179	429	160	0	211	146	543	436	528	0	698	0	157	319	413
SNORD2	ENSG00000238942	GGGACTGACCTGAAATGAAGAGAATACTCATTGCTGA		423	367	268	395	103	0	170	204	94	0	668	90	126	178	241	308	134	205	0	279	0	205	121	430	220	165	0	626	246	0	134	125	248	143	0	174	182	380	252	413	1958	370	0	193	181	514
SNORD57	ENSG00000226572	GGAGGTGATGAACTGTCTGAGCCTGAC		388	276	318	345	141	0	107	154	100	0	366	90	180	170	197	229	103	156	0	195	132	162	0	619	217	189	161	652	207	0	126	112	326	202	101	135	143	579	295	505	5250	256	191	213	284	502
SNORD110	ENSG00000221116	TCACTGATGTCTCCATGTCTCTGAG		234	326	194	276	100	0	0	125	0	0	244	0	94	133	212	223	0	0	0	238	0	105	0	185	104	0	128	575	236	0	126	151	309	165	0	188	114	474	199	330	2440	219	141	216	269	379
SNORD6	ENSG00000202314	AGGGGCTGAATGAAAATGGCCTTTCTGAA		296	147	139	190	0	0	0	0	0	0	225	0	0	70	136	132	0	0	0	134	0	88	0	204	103	96	96	578	175	0	94	127	233	163	0	138	153	373	121	380	3586	166	108	0	184	205
SNORA31	ENSG00000199477	CTGCATCCACTGATAGACCTTGAAC		890	503	469	0	0	208	546	450	0	0	1518	127	0	111	1056	0	141	153	0	203	0	267	0	150	348	445	124	184	263	458	0	0	0	0	0	0	181	0	0	428	1704	3102	281	0	721	0
RF00345	ENSG00000281010	GTCTGTGATGAATTGCTTTGACTTCTGA		412	193	933	2366	706	324	618	734	333	204	1407	297	604	729	690	608	455	851	252	434	463	464	259	3042	768	611	164	558	248	98	137	183	438	202	0	145	156	916	585	667	3532	540	98	111	122	169
SNORD42A	ENSG00000238649	CATGAACAAAGGAACCACTGAA		213	222	367	990	202	172	454	836	739	116	414	321	208	472	629	748	263	373	182	791	610	521	288	1531	547	1332	0	560	146	133	0	100	276	107	0	142	0	578	233	217	1081	175	0	118	141	224
SNORD10	ENSG00000238917	GCAAAGGATCAGTCTTTGTACTCTGAG		171	572	210	96	0	0	358	113	0	0	275	0	0	0	294	181	0	0	0	223	0	95	0	192	0	123	294	1218	366	261	233	188	328	224	134	363	185	842	247	234	1061	179	112	261	272	385
SNORD24	ENSG00000280889	CTATCTGAGAGATGGTGATGAC		228	143	77	203	0	0	0	194	0	0	0	0	0	76	231	104	0	0	0	212	0	86	0	0	117	143	0	382	110	95	79	124	361	75	0	155	102	0	276	370	475	352	0	127	120	93
SNORD59A	ENSG00000207031	TTTGCTGAAGCCACATTTAGGTACTGAG		169	172	224	240	115	0	0	125	92	0	301	0	0	140	191	229	0	148	0	204	96	122	0	137	144	138	0	264	0	0	0	0	160	0	0	0	0	168	115	172	929	149	0	123	147	164
SNORA58	ENSG00000249020	GATAAATTGCAGGACTCTAAAC		143	152	230	0	0	104	527	134	113	0	430	103	0	126	159	130	0	0	0	303	0	0	0	296	172	178	116	117	0	99	101	0	0	0	0	106	0	165	113	107	237	144	0	0	97	157
SNORD20	ENSG00000207280	TGGATATGATGACTGATTACCTGAG		538	265	722	763	268	182	310	319	281	99	807	179	238	446	482	532	177	390	149	493	265	364	157	1450	523	358	110	654	235	172	159	163	342	157	0	156	133	420	350	807	3176	720	138	157	462	779
SNORD6	ENSG00000206989	GAAAGAACGTGTGGAAAACTAATGACTGAG		329	163	145	379	150	0	0	178	0	0	260	0	0	102	176	167	0	0	0	204	146	190	99	325	225	182	0	449	140	0	109	148	343	136	0	130	106	244	139	463	2940	316	117	163	199	233
SNORA69	ENSG00000206622	ATGACAGATTGACATGGACAAT		106	479	316	0	0	0	139	0	0	0	336	0	0	0	151	0	0	0	0	153	0	0	0	193	103	0	228	452	0	0	0	0	0	0	0	0	117	0	0	0	856	0	129	161	152	0
SNORA24B	ENSG00000206903	CTCCATGTATCTTTGGGACCTGT		95	133	0	0	0	0	0	0	0	0	108	0	0	0	0	0	0	0	0	0	0	0	0	0	0	0	0	116	0	0	0	0	0	0	0	0	0	0	0	0	487	0	0	0	75	86
SNORD99	ENSG00000221539	AAATGCGGATATGGGACTGAG		106	345	1235	2378	1248	611	1768	595	1467	973	1247	1150	1088	2341	890	1847	1238	1214	502	1892	380	981	1003	2828	844	1334	185	1060	383	0	174	258	417	214	113	193	136	1139	552	408	1136	106	0	142	178	318
SNORD88C	ENSG00000220988	CTCCCATGATGTCCAGCACTGGGCTCT		115	116	151	108	0	0	59	154	100	0	93	113	100	0	0	0	113	0	0	0	0	0	0	127	95	0	110	254	97	139	0	0	218	0	0	0	94	123	178	112	1140	167	0	0	0	0
SNORD107	ENSG00000276314	GCTTAAAAATGACACTCTGAA		76	211	124	0	0	0	0	0	0	0	136	0	0	0	120	116	0	0	0	323	0	0	0	0	0	0	0	330	122	0	0	124	92	98	0	135	102	265	79	101	417	0	0	105	145	183
SNORD13	ENSG00000239039	CGTGGGCACATTACCCGTCTGAC		117	143	0	0	0	0	303	100	0	0	0	0	0	0	0	0	0	0	0	236	0	0	0	0	0	0	0	100	0	124	0	0	119	0	0	231	211	235	289	298	504	190	0	96	165	0
SNORA3B	ENSG00000212607	GTTAGTGCCCAGATCAGAAACATA		108	115	185	0	0	0	3745	193	0	0	335	0	0	0	245	112	108	129	0	247	129	120	0	459	202	283	0	136	0	0	0	0	0	0	0	0	0	111	0	114	342	216	0	0	0	150
SNORD18B	ENSG00000202529	TGATATTTGTGGAAATTCTGAC		121	276	163	0	0	101	151	0	116	0	187	0	0	114	0	0	0	0	0	143	0	0	0	136	0	0	209	267	0	0	111	138	124	98	0	140	149	188	199	0	228	0	0	102	112	105
RF01159	ENSG00000280554	GATATTTGTGGAAATTCTGAC		121	276	163	0	0	101	152	0	118	0	190	0	0	114	0	0	0	0	0	143	0	0	0	137	0	0	209	267	0	0	111	139	124	0	0	140	150	188	199	0	231	0	0	102	113	104
SNORD18A	ENSG00000200623	ATGATTTTCTCGGATGTTCTGAT		141	309	450	252	166	578	539	0	106	153	498	315	106	493	139	246	214	104	0	354	0	109	0	442	150	138	297	525	130	0	125	246	277	172	0	226	206	419	206	0	574	0	0	0	129	191
SNORD28	ENSG00000274544	GCATGTTAGAGTTCTGATGGC		185	288	440	371	152	251	653	193	248	313	707	202	282	302	355	385	248	196	178	650	0	284	233	1492	449	225	388	726	231	119	152	253	280	177	104	142	158	625	313	184	739	0	154	168	172	138
SNORD58C	ENSG00000202093	TTGCTGTGATGACTATCTTAGGAC		0	158	0	0	0	0	165	0	0	0	245	0	0	0	0	0	0	0	0	119	0	0	0	191	104	0	0	347	0	0	0	0	102	89	0	0	0	108	0	0	570	0	0	124	0	120
SNORD12C	ENSG00000209042	TTATATTTTGCCAGTTAGTTCT		141	109	0	99	0	0	173	0	0	0	77	0	0	116	102	0	0	0	0	86	0	0	0	359	0	0	0	197	0	0	0	0	98	0	0	0	0	200	0	85	381	0	0	0	99	90
SNORD116-25	ENSG00000252326	GATCGATGATGACTTTAAAATG		231	92	503	1112	171	341	392	337	265	159	1014	450	296	819	402	272	402	374	167	1279	194	479	236	547	699	345	102	208	0	0	0	90	124	131	0	100	0	229	160	0	243	118	0	96	0	0
SNORD107	ENSG00000276314	GTTCATGATGACACAGGACCTTGTCTGA		66	0	52	0	0	0	0	0	0	0	59	0	0	0	0	0	0	0	0	0	0	0	0	0	0	0	0	153	56	0	0	0	62	41	0	0	41	123	54	122	1056	0	0	42	53	102
SNORD26	ENSG00000276788	GATTAGTGGAGAAAACAGAAAATTCTGAGTA		120	94	80	0	0	0	35	0	0	0	111	0	0	0	70	0	0	0	0	80	0	0	0	91	0	0	0	233	80	0	0	0	105	0	0	0	0	80	127	114	374	80	0	0	0	70
SNORD12B	ENSG00000222365	CTTTTCTAAGCCAGTTTCTGTCT		94	161	0	0	0	0	132	0	0	0	0	0	0	0	0	0	0	0	0	0	0	0	0	0	0	0	0	299	0	0	0	0	0	0	0	0	0	139	0	0	387	0	0	0	124	115
SNORD45A	ENSG00000207241	GGTCAATGATGTGTTGGCATGTATTATCT		73	0	0	0	0	0	0	0	0	0	79	0	0	0	0	38	0	0	0	0	0	0	0	108	0	0	0	0	0	140	0	0	0	0	0	0	0	0	0	122	524	0	80	0	60	0
SNORD61	ENSG00000206979	TTTGTCCTCTAAGAAGTTCTGAG		92	215	112	77	0	0	0	0	0	0	0	0	0	0	218	0	0	0	0	0	0	0	0	0	0	0	0	456	171	0	91	173	201	76	0	142	107	278	0	0	1183	93	0	174	141	248
SNORA71B	ENSG00000235408	AACTCTGGAGCTTTCGTACATG		0	139	124	0	0	0	667	0	0	0	0	0	0	0	175	107	0	0	0	211	0	0	0	143	0	101	138	243	0	0	0	106	97	0	0	0	0	143	0	0	157	0	0	0	0	0
SNORD26	ENSG00000276788	CTACGGGGATGATTTTACGAACTGAA		69	0	47	0	0	0	72	0	0	0	91	0	0	0	45	0	0	0	0	36	0	0	0	144	0	0	0	116	35	0	0	0	62	0	0	0	0	99	0	46	480	69	0	0	0	79
SNORD82	ENSG00000202400	AATACTGAAACCTGATGTTACATTGTAGTGTGCTGATGTG		139	126	0	0	0	0	0	0	0	0	0	0	0	0	90	0	0	0	0	134	0	0	0	148	0	0	223	577	207	0	134	265	288	147	101	192	130	406	171	194	1092	93	0	100	133	98
SNORD4A	ENSG00000238578	GTGATTGGTACCTCGTTGTCTGAT		109	130	0	106	0	0	0	0	0	0	107	0	0	0	114	0	0	0	0	188	0	0	0	0	0	0	95	391	111	0	0	146	235	127	0	156	107	446	118	131	855	0	0	124	119	106
SNORD84	ENSG00000265607	GCGCAGTGATGACCCTCATCTATCACCCT		620	238	0	169	0	0	0	0	0	0	0	0	0	95	0	0	0	0	0	159	0	229	0	0	0	0	0	784	373	507	161	204	413	154	0	147	210	566	462	2084	5789	674	402	151	543	101
SNORD45C	ENSG00000206620	CTAGAATTACTCTGAGAC		0	237	0	0	0	0	134	0	0	0	103	0	0	0	108	0	0	0	0	127	0	0	0	134	0	0	418	569	194	106	105	279	284	192	116	202	114	340	227	108	309	0	108	115	125	0
SNORD83B	ENSG00000209480	GTTCAGTGATGAGGCCTGGAAT		0	88	0	0	0	0	104	0	0	0	126	0	0	0	0	0	0	0	0	0	0	0	0	105	0	0	0	247	84	0	0	0	107	0	0	0	0	228	113	0	348	0	0	0	160	0
SNORD114-12	ENSG00000202270	AATAATACGTGTCTGGAACTCTGAG		0	0	146	0	206	155	0	0	157	0	323	144	113	121	185	139	161	105	0	356	0	135	0	0	0	0	0	0	0	0	0	0	0	0	0	0	0	0	0	0	224	0	0	260	0	0
SNORA7B	ENSG00000207088	GATTGGAAGACACTCTGCGACAGT		0	123	97	0	0	0	0	0	0	0	106	0	0	0	97	0	0	0	0	149	0	0	0	0	0	0	0	166	0	0	0	0	0	0	0	0	0	0	0	0	462	0	0	100	117	0
SNORD45A	ENSG00000207241	CTAGAATTACTCTGAGAC		62	235	0	0	0	0	135	0	0	0	102	0	0	0	107	75	0	0	0	127	0	0	0	137	0	0	417	569	193	106	104	278	285	192	116	201	115	340	226	108	312	0	107	115	125	0
SNORA36B	ENSG00000222370	TATTCATTTATCCCCAGCCTA		236	151	310	85	173	135	0	84	96	0	243	74	208	91	0	169	0	133	0	485	98	170	0	83	153	118	180	116	96	198	132	113	177	153	200	166	101	98	189	326	896	225	139	135	207	187
SNORD114-21	ENSG00000272344	AATACGTGTCTGGAACTCTGAG		0	0	142	0	214	159	0	0	158	0	338	144	117	126	185	141	165	109	0	357	0	132	0	0	0	0	0	0	0	0	0	0	0	0	0	0	0	0	0	109	197	0	0	248	0	0
SNORD102	ENSG00000207500	AAACACATTTCACCGGCTCT		0	134	0	0	0	0	0	0	0	0	126	0	0	0	0	0	0	0	0	198	0	0	0	0	0	0	184	284	0	0	120	145	212	110	0	155	108	331	0	0	123	0	0	116	0	0
SNORD38B	ENSG00000281859	CTCAGTGATGAAAACTTTGTCCA		77	71	0	0	0	0	0	0	0	0	66	0	0	0	0	0	0	0	0	61	0	0	0	96	0	0	0	114	0	0	0	123	130	0	0	0	0	186	121	0	166	0	0	0	0	0
SNORA7A	ENSG00000207496	GATTGGAAGACACTCTGCGACAGT		0	127	0	0	0	0	0	0	0	0	134	0	0	0	0	0	0	0	0	113	0	0	0	0	0	0	0	178	0	0	0	0	0	0	0	0	0	0	0	0	494	0	0	94	116	0
SNORD38B	ENSG00000207421	CTCAGTGATGAAAACTTTGTCCA		77	71	0	0	0	0	0	0	0	0	0	0	0	0	0	0	0	0	0	61	0	0	0	96	0	0	0	114	0	0	0	123	130	0	0	0	0	186	121	0	166	0	0	0	0	0
SNORD38B	ENSG00000281859	GTAAGTGAAGATAAAGTGTGTCTGAG		41	74	0	0	0	0	0	0	0	0	72	0	0	0	0	0	0	0	0	89	0	0	0	62	0	0	0	170	0	0	0	50	62	0	0	0	0	109	49	0	447	0	0	0	0	0
SNORD93	ENSG00000221740	GCCAAGGATGAGAACTCTAATCTGAT		124	0	0	157	0	0	0	0	0	0	167	0	0	0	0	0	0	0	0	0	0	0	0	161	0	0	0	145	0	0	0	0	0	0	0	0	0	0	0	150	371	105	0	0	0	160
SNORD38A	ENSG00000202031	TCTCGTGATGAAAACTCTGT		352	458	586	362	240	356	1175	204	402	310	1413	252	259	522	236	369	406	312	195	725	103	235	174	1111	519	349	368	393	202	358	191	400	428	292	180	256	336	535	892	416	640	261	187	190	274	225
SNORD114-26	ENSG00000200413	ACGTGTCTGGAACTCTGAG		0	0	143	0	213	159	0	0	157	0	329	145	116	124	184	141	165	112	0	358	0	122	0	0	0	0	0	0	0	0	0	0	0	0	0	0	0	0	0	0	153	0	0	242	0	0
SNORD114-23	ENSG00000200406	ACGTGTCTGGAACTCTGAG		0	0	141	0	209	157	0	0	156	0	319	145	115	122	180	138	161	108	0	354	0	121	0	0	0	0	0	0	0	0	0	0	0	0	0	0	0	0	0	0	145	0	0	243	0	0
SNORD38B	ENSG00000207421	GTAAGTGAAGATAAAGTGTGTCTGAG		41	74	0	0	0	0	0	0	0	0	0	0	0	0	0	0	0	0	0	84	0	0	0	61	0	0	0	170	0	0	0	50	62	0	0	0	0	108	48	0	444	0	0	0	0	0
SNORA3A	ENSG00000200983	AGTCACCAGGTTAGAGACATG		0	103	178	0	0	0	159	0	0	0	136	0	0	0	0	0	0	0	0	180	0	0	0	0	0	0	120	277	0	0	0	0	0	0	0	0	0	115	0	0	197	0	0	0	0	0
SNORA24B	ENSG00000206903	TTCTGACTTGCACAAGTAACATT		0	73	0	0	0	0	0	0	0	0	0	0	0	0	0	0	0	0	0	0	0	0	0	0	0	0	0	78	0	0	0	0	0	0	0	190	0	0	0	0	215	0	0	0	40	0
SNORD114-1	ENSG00000199575	ACAGGTCTGGAAGTCTGAG		0	0	127	118	665	181	126	0	284	0	423	280	343	246	170	446	405	259	214	1017	0	365	221	131	144	225	0	0	0	0	0	0	0	0	0	0	0	0	0	135	306	0	0	198	0	0
SNORD114-16	ENSG00000199914	CGTGTCTGGAACTCTGAG		0	0	138	0	193	155	0	0	144	0	301	138	103	118	166	130	151	103	0	343	0	107	0	0	0	0	0	0	0	0	0	0	0	0	0	0	0	0	0	0	0	0	0	197	0	0
SNORD101	ENSG00000206754	TTGAATGATGACTTTAATTGTCGGATACC		0	0	0	0	0	0	0	0	0	0	103	0	0	0	0	0	0	0	0	0	0	0	0	0	0	0	0	110	0	0	0	0	0	0	0	0	0	0	0	75	656	0	0	0	0	103
SNORD43	ENSG00000263764	TGCTGATTGTCACGTTCTGAT		0	271	286	0	0	0	0	0	0	109	325	0	0	0	355	346	0	0	0	627	0	0	0	0	0	0	259	626	272	0	191	217	331	203	122	282	195	589	164	120	0	0	143	195	165	178
SNORA3C	ENSG00000221719	TAGTGCCCAGATCAGAAACATA		0	89	139	0	0	0	3465	137	0	0	262	0	0	0	147	0	0	0	0	166	0	0	0	332	111	224	0	95	0	0	0	0	0	0	0	0	0	0	0	0	129	0	0	0	0	0
SNORD18C	ENSG00000199574	ATGATTTTGTGGAAGTTCTGAT		0	104	147	135	0	0	131	0	0	0	190	0	0	0	131	134	0	0	0	0	0	0	0	232	0	0	0	0	0	0	0	0	0	0	0	0	0	0	0	0	0	0	0	0	0	0
SNORD116-24	ENSG00000207279	GTCATCTTCGTTGAACTGAGGTC		103	144	0	0	0	0	509	0	0	0	166	0	0	132	125	0	0	0	0	245	0	0	0	0	81	0	241	266	0	0	0	148	108	167	0	214	106	303	88	0	231	0	0	84	116	0
SNORD3C	ENSG00000264940	AAGTTTCTCTGAACGTGTAGAG		0	1629	5811	0	934	1285	6449	1597	1915	0	3795	1799	2137	2957	1174	1951	1728	2380	960	5997	597	2538	1796	2168	1665	1568	866	0	0	994	1179	0	0	1135	1298	1694	704	0	0	2041	3341	1289	1276	835	1775	1900
SNORD3B-2	ENSG00000262074	AAGTTTCTCTGAACGTGTAGAG		0	1629	5810	0	933	1285	6449	1597	1915	0	3795	1799	2137	2957	1174	1951	1728	2380	960	5996	597	2538	1796	2168	1665	1568	865	0	0	994	1179	0	0	1135	1298	1694	704	0	0	2040	3336	1289	1276	835	1774	1898
SNORD3B-1	ENSG00000265185	AAGTTTCTCTGAACGTGTAGAG		0	1629	5810	0	933	1285	6449	1597	1915	0	3795	1799	2137	2957	1174	1951	1728	2380	960	5996	597	2538	1796	2168	1665	1568	865	0	0	994	1179	0	0	1135	1298	1694	704	0	0	2040	3336	1289	1276	835	1774	1898
SNORD3A	ENSG00000263934	AAGTTTCTCTGAACGTGTAGAG		0	1629	5811	0	934	1285	6449	1597	1915	0	3795	1799	2137	2957	1174	1951	1728	2380	960	5997	597	2538	1796	2168	1665	1568	866	0	0	994	1179	0	0	1135	1298	1694	704	0	0	2041	3341	1289	1276	835	1775	1900
SNORD3H	ENSG00000207215	AAATTTCTCTGAACGTGTA		0	175	806	0	0	109	652	110	107	106	196	100	0	239	0	0	0	0	0	0	0	0	0	128	0	136	183	222	0	0	104	0	0	153	0	113	0	245	0	0	0	0	0	0	227	0
SNORD116-1	ENSG00000207063	TTCTCATCGGAACTGAGGTC		113	256	106	0	0	0	361	0	0	0	195	0	0	98	119	110	0	0	0	425	0	0	0	0	82	0	477	553	205	106	253	404	326	322	160	711	186	759	222	96	405	0	0	132	167	114
SNORD21	ENSG00000206680	ATTGTTTCAAGACGGGACTGAT		242	526	405	456	155	224	360	148	275	111	566	260	104	256	386	480	121	127	0	593	0	189	95	767	312	300	446	891	243	0	212	375	825	246	139	264	316	750	220	291	1557	141	284	335	322	270
SNORD64	ENSG00000276610	ATTTGTGATGAGCTGTGTTTACTGAG		0	0	0	51	0	0	0	0	0	0	0	0	0	0	0	0	0	0	0	0	0	0	0	0	0	0	0	53	0	0	0	0	0	0	0	0	0	46	0	0	334	0	0	0	0	0
SNORD12	ENSG00000212304	CTATTGGCCAGTTTTGTCTGAT		0	0	0	0	0	0	162	0	0	0	0	0	0	0	0	0	0	0	0	0	0	0	0	0	0	0	0	0	0	0	0	0	0	0	0	0	0	0	0	0	179	0	0	0	0	0
SNORD100	ENSG00000221500	CTCTACTGAACTGCCATGAGGAAACTGC		0	0	0	0	0	0	0	0	0	0	0	0	0	0	0	0	0	0	0	0	0	0	0	0	0	0	0	0	0	0	0	0	0	0	0	0	0	96	98	111	419	117	0	0	0	0
SNORD43	ENSG00000263764	ACAGATGATGAACTTATTGAC		472	321	622	767	338	329	547	355	354	277	553	395	335	729	525	668	472	471	257	1113	280	613	302	992	810	719	156	700	263	0	163	180	405	256	146	241	174	603	249	271	2151	311	136	229	327	359
SNORA5C	ENSG00000201772	GATAAGTTTGGCTGTGGACAGT		0	111	0	0	0	0	179	0	0	0	179	0	0	0	0	0	0	0	0	191	0	0	0	0	0	0	175	167	0	0	0	0	0	0	0	0	0	0	0	0	171	0	0	0	0	0
SNORD89	ENSG00000212283	GAGGAATGATGACAAGAAAAGG		0	0	199	0	0	0	0	0	0	0	140	0	0	0	0	0	0	0	0	0	0	0	0	218	0	0	0	85	98	0	0	0	0	0	0	0	0	0	0	201	101	0	0	0	0	0
SNORD62A	ENSG00000235284	GGAGATGAAGAGGACAGTGACTGAGAG		0	0	122	107	0	121	193	103	98	0	178	116	0	145	0	97	0	0	0	187	0	0	0	179	193	0	103	191	0	0	0	0	0	0	0	0	0	113	108	117	467	0	0	0	0	0
SNORD127	ENSG00000239043	AACTGTGATGAAAGATTTGGTCTGTATG		0	85	114	0	0	0	0	0	0	0	986	0	0	0	0	0	0	0	0	0	0	0	0	132	94	0	0	0	0	0	0	0	0	0	0	0	0	0	0	0	229	0	0	0	0	0
SNORD116-8	ENSG00000207093	TACCGTCGTTCTCATCGGAACTGA		190	439	125	0	0	0	403	0	0	0	186	0	0	0	219	140	0	0	0	512	0	0	0	0	93	0	508	822	277	121	286	496	432	378	186	820	257	977	230	145	918	0	97	208	296	223
RF01183	ENSG00000280904	CATGAGATCCAACTCTGAG		0	0	914	255	154	1461	882	147	534	789	746	522	824	817	166	129	788	847	154	284	0	229	592	618	513	180	0	0	0	0	0	0	0	0	0	0	0	0	148	0	0	0	0	0	0	0
RF00569	ENSG00000252787	CATGAGATCCAACTCTGAG		0	0	915	255	154	1462	882	147	534	789	746	522	824	817	166	129	788	847	154	284	0	229	592	618	513	180	0	0	0	0	0	0	0	0	0	0	0	0	148	0	0	0	0	0	0	0
SNORD116-9	ENSG00000206727	GTCGTTCTCATCGGAACTGAGGTC		190	439	125	87	0	0	403	0	0	0	186	0	0	0	219	140	0	0	0	512	0	0	0	82	93	91	508	822	277	121	286	496	432	378	186	820	257	977	230	145	918	0	97	208	296	223
SNORD48	ENSG00000265732	TGTCGCTGATGCCATCACCGCAGCGCTCTGAC		0	0	0	0	0	0	0	0	166	0	0	0	0	0	0	0	0	0	0	0	0	0	0	0	0	0	0	0	875	360	347	592	0	0	0	0	445	0	0	0	0	0	0	0	595	0
SNORD115-5	ENSG00000200503	TGTCCTGAAGAGAGGTGATGA		0	0	0	0	0	0	0	0	0	0	0	100	0	0	106	0	0	0	0	137	0	0	0	0	0	0	0	98	0	0	0	0	0	0	0	0	0	0	0	0	77	0	0	0	0	0
SNORD14C	ENSG00000202252	CCTTCCTTGGATGTCTGAGCG		0	118	0	0	0	0	87	0	0	0	0	0	0	0	0	0	0	0	0	0	0	0	0	0	0	0	0	230	0	0	0	0	0	0	0	0	0	106	0	0	246	0	0	0	0	0
SNORD115-36	ENSG00000202499	TGTCCTGAAGAGAGGTGATGA		0	0	0	0	0	0	0	0	0	0	0	100	0	0	106	0	0	0	0	137	0	0	0	0	0	0	0	98	0	0	0	0	0	0	0	0	0	0	0	0	76	0	0	0	0	0
SNORD64	ENSG00000276610	CTCAACGTGATTACTCTGAA		0	79	0	80	0	0	0	0	0	0	129	0	0	0	0	0	0	0	0	179	0	0	0	0	0	0	0	151	0	0	0	0	0	0	0	0	0	103	0	0	213	0	0	0	0	0
SNORD48	ENSG00000201823	GTCGCTGATGCCATCACCGCAGCGCTCTGAC		471	479	259	315	0	0	242	388	164	101	284	117	163	159	623	467	108	120	93	568	0	247	0	473	175	170	287	1285	912	356	347	592	874	396	203	439	463	1792	955	1233	5791	634	209	294	576	428
SNORD25	ENSG00000275043	CTCCGTGAGGATAAATAACTCTGAG		1099	0	818	1867	502	148	352	844	347	234	1405	282	462	351	821	998	344	617	100	909	375	516	306	1150	758	664	322	1882	852	214	376	616	649	559	276	510	510	1733	1063	1288	10812	1574	344	239	0	1715
SNORD114-9	ENSG00000201240	TTACATGATGAATACGTGTCTGGAACTCTGAG		0	0	171	0	261	163	0	0	166	0	426	150	145	142	207	167	187	149	124	385	0	236	106	0	97	0	0	0	0	169	0	0	0	0	0	0	0	0	0	255	642	0	140	322	0	145
SNORD115-12	ENSG00000199453	TGTCCTGAAGAGAGGTGATGA		0	0	0	0	0	0	0	0	0	0	0	100	0	84	107	0	0	0	0	138	0	0	0	0	0	0	0	99	0	0	0	0	0	0	0	0	0	0	0	0	0	89	0	0	0	0
SNORD115-41	ENSG00000200478	TGTCCTGAAGAGAGGTGATGA		0	0	0	0	0	0	0	0	0	0	0	100	0	0	106	0	0	0	0	137	0	0	0	0	0	0	0	97	0	0	0	0	0	0	0	0	0	0	0	0	75	0	0	0	0	0
SNORD115-26	ENSG00000275524	TGTCCTGAAGAGAGGTGATGA		0	0	0	0	0	0	0	0	0	0	0	100	0	0	106	0	0	0	0	137	0	0	0	0	0	0	0	98	0	0	0	0	0	0	0	0	0	0	0	0	0	0	0	0	0	0
SNORD115-39	ENSG00000200564	TGTCCTGAAGAGAGGTGATGA		0	0	0	0	0	0	0	0	0	0	0	100	0	0	106	0	0	0	0	137	0	0	0	0	0	0	0	97	0	0	0	0	0	0	0	0	0	0	0	0	0	0	0	0	0	0
SNORD116-14	ENSG00000206621	CATTCTCGTCGAACTGAGGTC		0	107	90	0	0	0	568	0	0	0	152	0	0	82	162	111	0	0	0	315	0	0	0	0	0	0	523	352	125	0	88	300	158	194	116	190	116	464	247	0	179	0	0	74	113	0
SNORD32A	ENSG00000201675	GGTCAGTGATGAGCAACATTCAC		0	0	171	0	0	94	85	99	0	0	115	0	93	0	213	0	0	95	0	196	0	76	0	322	0	0	0	163	0	0	0	0	0	0	0	0	0	76	75	139	207	0	0	0	0	0
SNORD3C	ENSG00000264940	GGAGAGAACGCGGTCTGAGTG		3332	2720	8751	6111	671	1591	7546	3220	3052	3628	2353	1876	2810	3143	1468	4251	1790	2119	1352	4359	314	2227	4282	2437	2265	2175	1873	11895	3256	1186	3124	1724	4706	3286	1585	2416	1523	8728	5018	2494	8279	2916	1046	1185	2859	4075
SNORD3B-2	ENSG00000262074	GGAGAGAACGCGGTCTGAGTG		3332	2720	8751	6111	671	1591	7546	3220	3052	3628	2353	1876	2810	3143	1468	4251	1790	2119	1352	4359	314	2227	4282	2437	2265	2175	1873	11895	3256	1186	3124	1724	4706	3286	1585	2416	1523	8728	5018	2494	8279	2916	1046	1185	2859	4075
SNORD3B-1	ENSG00000265185	GGAGAGAACGCGGTCTGAGTG		3332	2720	8751	6111	671	1591	7546	3220	3052	3628	2353	1876	2810	3143	1468	4251	1790	2119	1352	4359	314	2227	4282	2437	2265	2175	1873	11895	3256	1186	3124	1724	4706	3286	1585	2416	1523	8728	5018	2494	8279	2916	1046	1185	2859	4075
SNORD3A	ENSG00000263934	GGAGAGAACGCGGTCTGAGTG		3332	2720	8751	6111	671	1591	7546	3220	3052	3628	2353	1876	2810	3143	1468	4251	1790	2119	1352	4359	314	2227	4282	2437	2265	2175	1873	11895	3256	1186	3124	1724	4706	3286	1585	2416	1523	8728	5018	2494	8279	2916	1046	1185	2859	4075
SNORA73B	ENSG00000200087	CCAACGTGGATACCCTGGGAG		0	0	0	0	0	0	184	0	0	0	0	0	0	0	0	0	0	0	0	0	0	0	98	558	0	0	0	0	0	0	0	0	0	0	0	0	0	153	0	0	75	0	0	0	0	0
SNORD115-19	ENSG00000199968	TGTCCTGAAGAGAGGTGATGA		0	0	0	0	0	0	0	0	0	0	0	100	0	0	107	0	0	0	0	138	0	0	0	0	0	0	0	99	0	0	0	0	0	0	0	0	0	0	0	0	80	0	0	0	0	0
SNORD115-3	ENSG00000199970	TGTCCTGAAGAGAGGTGATGA		0	0	0	0	0	0	0	0	0	0	0	100	0	0	106	0	0	0	0	137	0	0	0	0	0	0	0	98	0	0	0	0	0	0	0	0	0	0	0	0	0	0	0	0	0	0
SNORD115-22	ENSG00000201326	TGTCCTGAAGAGAGGTGATGA		0	0	0	0	0	0	0	0	0	0	0	100	0	0	106	0	0	0	0	137	0	0	0	0	0	0	0	98	0	0	0	0	0	0	0	0	0	0	0	0	0	0	0	0	0	0
SNORD115-20	ENSG00000201969	TGTCCTGAAGAGAGGTGATGA		0	0	0	0	0	0	0	0	0	0	0	100	0	0	107	0	0	0	0	138	0	0	0	0	0	0	0	99	0	0	0	0	0	0	0	0	0	0	0	0	0	0	0	0	0	0
SNORD42B	ENSG00000238423	CTTCAAAGGAACCACTGAT		0	0	0	0	0	0	0	0	0	0	0	0	0	0	46	0	0	0	0	70	0	0	0	0	0	0	0	220	0	0	0	0	93	0	0	0	0	220	78	0	131	0	0	0	0	0
SNORD115-25	ENSG00000199489	TGTCCTGAAGAGAGGTGATGA		0	0	0	0	0	0	0	0	0	0	0	100	0	0	106	0	0	0	0	137	0	0	0	0	0	0	0	97	0	0	0	0	0	0	0	0	0	0	0	0	0	0	0	0	0	0
SNORD60	ENSG00000206630	AGTCTGTGATGAATTGCTTTGACTTCTGA		798	359	5197	13575	2606	1484	3448	3488	1867	1085	9494	2167	3885	3599	3885	3385	2202	5645	1287	1908	2831	2842	1252	20711	3907	3084	413	968	420	308	296	363	983	421	157	293	256	1733	944	1320	6131	901	229	220	279	333
SNORA65	ENSG00000201302	CCCGCCACTGCACCTGACCA		0	0	0	0	0	0	0	0	0	0	0	0	0	0	0	0	0	0	0	0	0	0	0	0	0	0	0	0	0	0	0	0	0	0	0	0	0	0	0	0	156	0	0	0	0	0
SNORD36C	ENSG00000281541	ATGTGGTCAGCATTGCATCTGAGG		0	0	0	0	0	0	0	0	0	0	0	0	0	0	0	0	0	0	0	0	0	0	0	0	0	0	0	170	0	0	0	0	0	0	0	0	0	0	0	0	223	0	0	0	0	0
SNORD22	ENSG00000277194	TTCCAGAAGGAACTGTCTGAGGG		0	0	0	0	0	0	0	0	0	0	0	0	0	0	0	0	0	0	0	0	0	0	0	0	0	0	0	190	0	0	0	0	0	0	0	0	0	101	0	0	416	0	0	0	0	0
SNORD48	ENSG00000265732	AGTGATGATGACCCCAGGTAACTCTGAG		0	0	698	1244	0	0	0	0	392	0	1018	233	396	765	0	0	0	273	0	0	947	0	194	0	512	0	0	0	0	0	0	0	0	0	0	0	0	0	0	0	0	0	0	0	0	1035
SNORD58B	ENSG00000271982	GAAAACAACTACTCTCTGAGCA		0	0	0	0	0	0	0	0	31	0	0	0	0	0	0	0	50	0	0	95	0	0	0	0	0	0	90	185	0	0	0	0	0	0	0	0	0	124	0	0	264	0	0	0	0	0
SNORD116-2	ENSG00000207001	CGTCATTCTCATCGGAACTG		119	271	112	0	0	0	360	0	0	0	202	0	0	99	126	116	0	0	0	432	0	0	0	0	88	0	477	578	209	107	254	404	330	324	161	720	190	765	223	108	453	0	0	143	179	123
SNORD91A	ENSG00000212163	CTCAGTGATGCAATCTCTGTGTGGTTCTGAGAC		0	0	0	0	0	0	0	0	0	0	0	0	0	0	0	0	0	0	0	0	0	0	0	0	0	0	0	139	0	0	0	0	91	0	0	0	0	151	0	0	406	0	0	0	0	0
SNORD30	ENSG00000277846	CTTGCTGTTGAGACTCTGAAATCTGA		0	0	0	0	0	0	0	0	0	0	0	0	0	0	0	0	0	0	0	0	0	0	0	0	0	0	0	0	0	0	0	0	0	0	0	0	0	0	0	0	3994	0	0	0	0	0
SNORD116-16	ENSG00000207263	GTCATCCTCGTCGAACTGAGGTC		299	678	348	239	83	170	1794	203	157	168	474	191	114	315	440	289	105	121	0	885	0	157	130	232	281	226	1079	999	293	139	230	482	369	394	218	618	395	1005	495	346	1516	188	200	406	423	274
SNORD116-6	ENSG00000207442	CGTCATTCTCATCGGAACTG		118	271	112	0	0	0	360	0	0	0	202	0	0	99	126	116	0	0	0	432	0	0	0	0	88	0	477	578	209	106	254	404	330	324	161	720	190	765	223	108	453	0	0	143	179	122
SNORD116-21	ENSG00000277785	GTCATCCTCGTCGAACTGAGGTC		299	678	348	239	0	170	1794	203	157	168	474	191	114	315	440	289	105	121	0	885	0	157	130	232	281	226	1079	999	293	139	230	482	369	394	218	618	395	1005	495	346	1516	188	200	406	413	274
SNORD116-18	ENSG00000206688	GTCATCCTCGTCGAACTGAGGTC		299	678	348	239	0	170	1794	203	157	168	468	191	114	315	440	289	105	121	0	885	0	157	130	232	281	226	1079	999	293	139	230	482	369	394	218	625	395	1005	495	346	1516	188	200	406	423	274
SNORD45C	ENSG00000206620	GGTCAATGATGAGTTGGCATGTATTCTG		0	0	0	0	0	0	0	0	0	0	0	0	0	0	0	0	0	0	0	0	0	0	0	69	0	0	0	0	0	0	0	0	0	0	0	0	0	0	0	0	186	0	0	0	0	0
SNORD114-22	ENSG00000202293	ATATGTGATGAATACGTGTTTGGAACTCTGAGGT		0	0	0	0	160	128	0	0	0	0	250	104	98	0	99	0	141	110	0	134	0	155	0	0	0	0	0	0	0	157	0	0	0	0	0	0	0	0	0	188	589	0	105	127	0	111
SNORD116-20	ENSG00000278715	CATCCTCGTCGAACTGAGGTC		264	553	275	158	0	152	1726	141	139	153	394	163	95	271	342	257	87	101	0	815	0	120	0	147	211	206	1056	882	258	116	224	464	325	374	201	598	356	919	473	301	845	159	181	356	315	188
SNORD87	ENSG00000254341	CAGCTGAGGTTGTCTTTGAAGAAATAATTTTAAGACTGAG		0	0	0	0	0	0	0	0	0	0	0	0	0	0	0	0	0	0	0	0	0	0	0	0	0	0	0	149	0	0	0	0	0	0	0	0	0	0	0	0	249	0	0	0	0	0
SNORD83A	ENSG00000209482	GTTCGTTGATGAGGCTCAGAGTGAGCG		0	0	0	0	0	0	0	0	0	0	0	0	0	0	0	0	0	0	0	0	0	0	0	120	0	0	0	95	0	0	0	0	0	0	0	0	0	96	0	0	0	0	0	0	0	0
SNORD116-19	ENSG00000207460	GTCATCCTCGTCGAACTGAGGTC		299	669	344	239	83	170	1794	203	157	168	468	191	114	315	440	289	105	121	0	885	0	157	130	232	281	226	1079	999	293	139	230	482	369	394	218	618	395	1005	495	346	1516	188	200	406	413	271
SNORD116-22	ENSG00000275127	GTCATCCTCGTCGAACTGAGGTC		299	669	344	239	0	170	1794	203	157	168	468	191	114	315	440	289	105	121	0	885	0	157	130	232	281	226	1079	999	293	139	230	482	369	394	218	618	395	1005	495	346	1516	188	200	406	413	271
SNORD27	ENSG00000275996	CTCCATGATGAACACAAAATGACAAG		0	453	0	0	0	0	275	453	0	0	0	0	0	0	306	0	0	192	0	0	0	0	0	519	0	0	350	1569	750	698	355	531	830	337	203	461	278	653	565	793	0	449	0	250	361	0
SNORD71	ENSG00000223224	CACAATGCTGACACTCAAACTGCTGAC		0	0	0	0	0	0	0	0	0	0	0	0	0	0	0	0	0	0	0	0	0	0	0	0	0	0	0	0	0	0	0	0	0	0	0	0	0	0	0	0	741	0	0	0	0	0
SNORD92	ENSG00000264994	AATTCCTTGGCTGTGTCTGAG		0	0	0	0	0	0	371	0	0	0	0	0	0	0	0	0	0	0	0	0	0	0	0	156	0	0	0	0	0	0	0	0	0	0	0	0	0	0	0	0	100	0	0	0	0	0
SNORA44	ENSG00000273544	CAGCATGTTTCCAAGGGCTGTGGCT		0	83	0	0	0	0	0	0	0	0	69	0	0	0	0	0	0	0	0	0	0	0	0	0	81	0	0	0	0	0	0	0	0	0	0	0	0	0	0	0	111	0	0	0	0	0
SNORD96A	ENSG00000272296	GAGGACATGTCCTGCAATTCTGAA		0	0	0	0	0	0	0	0	0	0	0	0	0	0	0	0	0	0	0	0	0	0	0	0	0	0	0	133	0	0	0	0	0	0	0	0	0	366	0	0	189	0	0	0	0	0
SNORD58A	ENSG00000206602	CTGCAGTGATGACTTTCTTAGGACACCTT		0	0	0	102	0	0	0	0	0	0	0	0	0	0	0	0	96	0	0	0	0	0	0	91	0	0	0	134	0	0	0	0	0	0	0	0	0	0	0	0	241	0	0	0	0	0
SNORD1B	ENSG00000199961	TTTCTGTGTGGAATTTGAATATCTGAA		860	545	1606	1618	1378	261	448	478	545	552	2867	363	615	965	871	1127	535	814	297	1354	348	470	307	1706	975	701	222	922	279	109	266	260	871	274	211	327	443	647	828	1622	5268	500	250	723	676	794
SNORD115-34	ENSG00000199311	TGTTCTGAAGAGAGGTGATGAC		0	0	0	0	0	0	0	0	0	0	0	0	0	0	0	0	0	0	0	0	0	0	0	0	0	0	0	70	0	0	0	0	0	0	0	0	0	0	0	0	0	0	0	0	0	0
SNORD56	ENSG00000229686	GTTGAGACTCTGGGTCTGAGT		0	0	0	0	0	0	0	0	0	0	0	0	0	0	0	0	0	0	0	0	0	0	0	0	0	0	0	149	0	0	0	0	0	0	0	0	0	0	0	0	197	0	0	0	0	0
SNORD46	ENSG00000200913	GGACTTGTCATAGTTACACTGAC		0	0	0	0	0	0	0	0	0	0	0	0	0	0	0	0	0	0	0	0	0	0	0	0	0	0	0	153	0	0	0	95	109	0	0	0	0	96	0	0	216	0	0	0	0	0
SNORD115-4	ENSG00000200680	TGTTCTGAAGAGAGGTGATGAC		0	0	0	0	0	0	0	0	0	0	0	0	0	0	0	0	0	0	0	0	0	0	0	0	0	0	0	66	0	0	0	0	0	0	0	0	0	0	0	0	0	0	0	0	0	0
SNORD115-15	ENSG00000201679	TGTTCTGAAGAGAGGTGATGAC		0	0	0	0	0	0	0	0	0	0	0	0	0	0	0	0	0	0	0	0	0	0	0	0	0	0	0	68	0	0	0	0	0	0	0	0	0	0	0	0	0	0	0	0	0	0
SNORD115-14	ENSG00000199960	TTGTCTGAAGAGAGGTGATGAC		0	0	0	0	0	0	0	0	0	0	0	0	0	0	0	0	0	0	0	0	0	0	0	0	0	0	0	0	0	0	0	0	0	0	0	0	0	0	0	0	0	0	0	0	0	0
SNORD115-6	ENSG00000200812	TGTTCTGAAGAGAGGTGATGAC		0	0	0	0	0	0	0	0	0	0	0	0	0	0	0	0	0	0	0	0	0	0	0	0	0	0	0	66	0	0	0	0	0	0	0	0	0	0	0	0	0	0	0	0	0	0
SNORD115-42	ENSG00000201143	TGTTCTGAAGAGAGGTGATGAC		0	0	0	0	0	0	0	0	0	0	0	0	0	0	0	0	0	0	0	0	0	0	0	0	0	0	0	0	0	0	0	0	0	0	0	0	0	0	0	0	0	0	0	0	0	0
SNORD21	ENSG00000206680	CTGAATGATGATATCCCACTAACTGAG		0	0	0	0	0	0	0	0	0	0	0	0	0	0	0	0	0	0	0	0	0	0	0	0	0	0	0	0	0	0	0	0	0	0	0	0	0	0	0	0	0	52	0	0	0	0
SNORD15B	ENSG00000207445	CTTCAGTGATGACACGATGACGAG		0	0	0	0	0	0	0	0	0	0	0	0	0	0	0	0	0	0	0	0	0	0	0	0	0	0	0	0	0	0	0	0	0	0	0	0	0	0	0	0	0	0	0	0	0	0
SNORD41	ENSG00000209702	CGCGTATTCGTACTGGCTGATCCT		0	0	0	0	0	0	83	0	0	0	0	0	0	0	0	0	0	0	0	0	0	0	0	145	0	0	0	0	0	0	0	0	0	0	0	0	0	0	0	0	0	0	0	0	0	0
SNORD58B	ENSG00000271982	CTGCGATGATGGCATTTCTTAGGACACCT		0	0	0	0	0	0	0	0	75	0	0	0	0	0	0	0	72	0	0	0	0	0	0	0	0	0	0	0	0	0	0	0	0	0	0	0	0	0	0	0	0	0	0	0	0	0
SNORD5	ENSG00000239195	ACGGGCATGAACTAAAACTTAATTCTGAC		0	0	0	0	0	0	0	0	0	0	0	0	0	0	0	0	0	0	0	0	0	0	0	0	0	0	0	133	0	0	0	0	0	0	0	0	0	0	0	0	170	0	0	0	0	0
RF00493	ENSG00000273885	GTTTCTACACTTGACCTGAGC		0	0	0	0	0	0	0	0	0	0	0	0	0	0	0	0	0	0	0	0	0	0	0	0	0	0	0	130	0	0	0	0	0	0	0	0	0	87	0	0	133	0	0	0	0	0
SNORD88A	ENSG00000221241	CTCCATGATGTCCAGCACTGGGCTCCGA		0	0	0	0	0	0	0	0	0	0	0	0	0	0	0	0	0	0	0	0	0	0	0	0	0	0	0	137	0	0	0	0	103	0	0	0	0	81	0	0	231	0	0	0	0	0
RF00399	ENSG00000207130	TTCTGACTTGCACAAGTAACAT		0	0	0	0	0	0	0	0	0	0	0	0	0	0	0	0	0	0	0	0	0	0	0	0	0	0	0	0	0	0	0	0	0	0	0	191	0	0	0	0	215	0	0	0	0	0
SNORD105	ENSG00000209645	CTCTCATGATGAACACATATGCCTCTGA		0	0	0	0	0	0	0	0	0	0	0	0	0	0	0	0	0	0	0	0	0	0	0	0	0	0	0	0	0	0	0	0	0	0	0	0	0	0	0	0	281	0	0	0	0	0
RF00494	ENSG00000201592	CTACCTGATGCATGATCTCTACAGTTCT		0	0	0	0	0	0	0	0	0	0	0	0	0	0	0	0	0	0	0	0	0	0	0	0	0	0	0	0	0	0	0	0	0	0	0	0	0	0	0	0	105	0	0	0	0	0
RF00494	ENSG00000275146	CTACCTGATGCATGATCTCTACAGTTCT		0	0	0	0	0	0	0	0	0	0	0	0	0	0	0	0	0	0	0	0	0	0	0	0	0	0	0	0	0	0	0	0	0	0	0	0	0	0	0	0	105	0	0	0	0	0
SNORD1A	ENSG00000278261	TGGACTGAGGGAAATAATCTATTCTGAG		0	0	0	0	0	0	0	0	0	0	0	0	0	0	0	0	0	0	0	0	0	0	0	0	0	0	0	0	0	0	0	0	0	0	0	0	0	0	0	0	118	0	0	0	0	0
SNORD37	ENSG00000206775	GTCTACTGAAGAAAGCCTGCGTCTGAG		0	0	0	0	0	0	0	0	0	0	0	0	0	0	0	0	0	0	0	0	0	0	0	0	0	0	0	0	0	0	0	0	0	0	0	0	0	0	0	0	187	0	0	0	0	0
RF00218	ENSG00000201009	AAGGACTTGTCATAGTTACACTGAC		0	0	0	0	0	0	0	0	0	0	0	0	0	0	0	0	0	0	0	0	0	0	0	0	0	0	0	153	0	0	0	0	109	0	0	0	0	0	0	0	215	0	0	0	0	0
SNORD32A	ENSG00000201675	CAACCCCATGCACCGCTCTGAGAC		0	0	0	0	0	0	0	50	0	0	0	0	0	0	0	0	0	0	0	0	0	0	0	0	0	0	0	87	0	0	0	0	0	0	0	0	0	102	0	0	101	0	0	0	0	0
SNORD54	ENSG00000238650	ATTTTATACGCTATTCTGAGCCA		0	0	0	0	0	0	0	0	0	0	0	0	0	0	0	0	0	0	0	0	0	0	0	0	0	0	0	163	0	0	0	0	0	0	0	0	0	86	0	0	174	0	0	0	0	0
SNORA73A	ENSG00000274266	CCAACGTGGATACACCCGGGAGG		0	0	0	0	0	0	0	0	0	0	0	0	0	0	0	0	0	0	0	0	0	0	0	242	0	0	0	0	0	0	0	0	0	0	0	0	0	0	0	0	0	0	0	0	0	0
RF00265	ENSG00000212206	CAGATTGACATGGACAA		0	0	0	0	0	0	0	0	0	0	0	0	0	0	0	0	0	0	0	0	0	0	0	0	0	0	0	0	0	0	0	0	0	0	0	0	0	0	0	0	0	0	0	0	0	0
SNORD115-10	ENSG00000201943	TTGTCTGAAGAGAGGTGATGAC		0	0	0	0	0	0	0	0	0	0	0	0	0	0	0	0	0	0	0	0	0	0	0	0	0	0	0	0	0	0	0	0	0	0	0	0	0	0	0	0	0	0	0	0	0	0
SNORD41	ENSG00000209702	GGGAAGTGATGACACCTGTGACTGTTGA		0	0	0	0	0	0	0	0	0	0	0	0	0	0	0	0	0	0	0	0	0	0	0	0	0	0	0	0	0	0	0	0	0	0	0	0	0	0	0	0	0	0	0	0	0	0
SNORD115-14	ENSG00000199960	CTCAATAGGATTACGCTGAG		0	0	0	0	0	0	0	0	0	0	0	0	0	0	0	0	0	0	0	0	0	0	0	0	0	0	0	124	0	0	0	0	0	0	0	0	0	0	0	0	0	0	0	0	0	0
SNORD33	ENSG00000199631	CGGCCGGTGATGAGAACTTC		0	0	0	0	0	0	0	0	0	0	0	0	0	0	0	0	0	0	0	0	0	0	0	212	0	0	0	79	0	0	0	0	0	0	0	0	0	191	0	0	0	0	0	0	0	0
SNORD116-27	ENSG00000251896	GATCGATGATGACTTAAAG		0	0	0	0	0	0	0	0	0	0	0	0	0	0	0	0	0	0	0	0	0	0	0	0	0	0	0	0	0	0	0	0	0	0	0	0	0	0	0	0	51	0	0	0	0	0
SNORD14C	ENSG00000202252	TCGCTGTGATGAGTGATT		0	0	0	0	0	0	0	0	0	0	0	0	0	0	0	0	0	0	0	0	0	0	0	0	0	0	0	0	0	0	0	0	0	0	0	0	0	41	0	0	0	0	0	0	0	0
SNORD15B	ENSG00000207445	TATTTATTGATCGATTTAGAGGCATTTGTCTGAG		0	0	0	0	0	0	86	0	0	0	0	0	0	0	0	0	0	0	0	0	0	0	0	0	0	0	0	0	0	0	0	0	0	0	0	0	0	0	0	0	0	0	0	0	0	0
SNORD114-11	ENSG00000200608	TGTCTGGAACTCTGAGG		0	0	0	0	0	0	0	0	0	0	101	0	0	0	0	0	0	0	0	0	0	0	0	0	0	0	0	0	0	0	0	0	0	0	0	0	0	0	0	0	0	0	0	0	0	0
SNORD114-15	ENSG00000201557	TGTCTGGAACTCTGAGG		0	0	0	0	0	0	0	0	0	0	110	0	0	0	0	0	0	0	0	0	0	0	0	0	0	0	0	0	0	0	0	0	0	0	0	0	0	0	0	0	0	0	0	0	0	0
SNORD14D	ENSG00000207118	TCGCTATGATGATGGATTCCAAAACCATT		0	0	0	0	0	0	0	0	0	0	0	104	0	0	0	0	150	0	0	0	0	0	0	170	0	0	0	74	0	0	0	0	0	0	0	0	0	0	0	0	0	0	0	0	0	0
SNORD114-3	ENSG00000201839	CTACGTGTCTGAAACTCTGAG		0	0	0	0	0	0	0	0	0	0	0	0	0	0	0	0	0	0	0	0	0	0	0	0	0	0	0	0	0	0	0	0	0	0	0	0	0	0	0	0	108	0	0	0	0	0
RF01848	ENSG00000277492	AGAAGTTTCTCTGAACGTG		0	0	0	0	0	0	648	0	0	0	111	0	0	0	0	0	0	0	0	230	0	0	0	0	0	0	80	0	0	0	0	0	0	0	0	0	0	0	0	0	0	0	0	0	0	0
SNORD3E	ENSG00000280704	AGAAGTTTCTCTGAACGTG		0	0	0	0	0	0	648	0	0	0	111	0	0	0	0	0	0	0	0	230	0	0	0	0	0	0	80	0	0	0	0	0	0	0	0	0	0	0	0	0	0	0	0	0	0	0
SNORD95	ENSG00000264549	TGTCGGTGCTGAAATCCAGAGGCTGTTTCTGAG		1165	875	845	1341	434	0	297	936	380	245	815	279	346	500	1129	865	272	398	218	1522	317	613	456	635	718	518	330	1259	673	220	333	487	1012	406	192	454	528	1168	922	2188	7594	1453	631	795	947	809
SNORD115-44	ENSG00000202261	CTCAATAGGATTACGCTGAGG		0	0	0	0	0	0	0	0	0	0	0	0	0	0	0	0	0	0	0	0	0	0	0	0	0	0	0	124	0	0	0	0	0	0	0	0	0	0	0	0	0	0	0	0	0	0
SNORD96A	ENSG00000272296	CCTGGTGATGACAGATGGCAT		0	0	0	0	0	0	0	0	0	0	0	0	0	0	0	0	0	0	0	0	0	0	0	0	0	0	0	0	0	0	0	0	0	0	0	0	0	0	0	0	0	0	0	0	0	0
SNORD115-33	ENSG00000200593	CTCAATAGGATTACGCTGAGG		0	0	0	0	0	0	0	0	0	0	0	0	0	0	0	0	0	0	0	0	0	0	0	0	0	0	0	124	0	0	0	0	0	0	0	0	0	0	0	0	0	0	0	0	0	0
SNORD115-34	ENSG00000199311	CTCAATAGGATTACGCTGAG		0	0	0	0	0	0	0	0	0	0	0	0	0	0	0	0	0	0	0	0	0	0	0	0	0	0	0	124	0	0	0	0	0	0	0	0	0	0	0	0	0	0	0	0	0	0
SNORD115-10	ENSG00000201943	CTCAATAGGATTACGCTGAGG		0	0	0	0	0	0	0	0	0	0	0	0	0	0	0	0	0	0	0	0	0	0	0	0	0	0	0	124	0	0	0	0	0	0	0	0	0	0	0	0	0	0	0	0	0	0
SNORA58B	ENSG00000201129	GGGCATACCCGTAGACCTTGTCTGACTG		0	0	0	0	0	0	0	0	0	0	99	0	0	0	0	0	0	0	0	0	0	0	0	0	0	0	0	0	0	0	0	0	0	0	0	0	0	0	0	0	362	0	0	0	0	0
SNORD115-41	ENSG00000200478	CTCAATAGGATTACGCTGAG		0	0	0	0	0	0	0	0	0	0	0	0	0	0	0	0	0	0	0	0	0	0	0	0	0	0	0	124	0	0	0	0	0	0	0	0	0	0	0	0	40	0	0	0	0	0
SNORD115-36	ENSG00000202499	CTCAATAGGATTACGCTGAG		0	0	0	0	0	0	0	0	0	0	0	0	0	0	0	0	0	0	0	0	0	0	0	0	0	0	0	124	0	0	0	0	0	0	0	0	0	0	0	0	40	0	0	0	0	0
SNORD115-6	ENSG00000200812	CTCAATAGGATTACGCTGAG		0	0	0	0	0	0	0	0	0	0	0	0	0	0	0	0	0	0	0	0	0	0	0	0	0	0	0	124	0	0	0	0	0	0	0	0	0	0	0	0	0	0	0	0	0	0
SNORD116-7	ENSG00000207133	GATCGATGATGAGTCCCCC		0	0	0	0	0	0	0	0	0	0	0	0	0	0	0	0	0	0	0	0	0	0	0	0	0	0	0	0	0	0	0	0	0	0	0	0	0	0	0	0	0	0	0	0	0	0
SNORD115-39	ENSG00000200564	CTCAATAGGATTACGCTGAG		0	0	0	0	0	0	0	0	0	0	0	0	0	0	0	0	0	0	0	0	0	0	0	0	0	0	0	124	0	0	0	0	0	0	0	0	0	0	0	0	0	0	0	0	0	0
SNORD115-26	ENSG00000275524	CTCAATAGGATTACGCTGAG		0	0	0	0	0	0	0	0	0	0	0	0	0	0	0	0	0	0	0	0	0	0	0	0	0	0	0	124	0	0	0	0	0	0	0	0	0	0	0	0	0	0	0	0	0	0
SNORD115-13	ENSG00000273835	CTCAATAGGATTACGCTGAG		0	0	0	0	0	0	0	0	0	0	0	0	0	0	0	0	0	0	0	0	0	0	0	0	0	0	0	124	0	0	0	0	0	0	0	0	0	0	0	0	0	0	0	0	0	0
SNORD115-4	ENSG00000200680	CTCAATAGGATTACGCTGAG		0	0	0	0	0	0	0	0	0	0	0	0	0	0	0	0	0	0	0	0	0	0	0	0	0	0	0	124	0	0	0	0	0	0	0	0	0	0	0	0	0	0	0	0	0	0
SNORD115-15	ENSG00000201679	CTCAATAGGATTACGCTGAGG		0	0	0	0	0	0	0	0	0	0	0	0	0	0	0	0	0	0	0	0	0	0	0	0	0	0	0	124	0	0	0	0	0	0	0	0	0	0	0	0	0	0	0	0	0	0
SNORD118	ENSG00000200463	ACCCTGATTGCTCCTGTCTGA		0	0	0	0	0	0	185	0	0	0	0	0	0	0	0	0	0	0	0	0	0	0	0	0	0	0	0	0	0	0	0	0	0	0	0	0	0	0	0	0	202	0	0	0	0	0
SNORD115-5	ENSG00000200503	CTCAATAGGATTACGCTGAG		0	0	0	0	0	0	0	0	0	0	0	0	0	0	0	0	0	0	0	0	0	0	0	0	0	0	0	124	0	0	0	0	0	0	0	0	0	0	0	0	40	0	0	0	0	0
SNORD115-16	ENSG00000200757	CTCAATAGGATTACGCTGAG		0	0	0	0	0	0	0	0	0	0	0	0	0	0	0	0	0	0	0	0	0	0	0	0	0	0	0	124	0	0	0	0	0	0	0	0	0	0	0	0	0	0	0	0	0	0
SNORD115-8	ENSG00000200726	CTCAATAGGATTACGCTGAGG		0	0	0	0	0	0	0	0	0	0	0	0	0	0	0	0	0	0	0	0	0	0	0	0	0	0	0	124	0	0	0	0	0	0	0	0	0	0	0	0	0	0	0	0	0	0
SNORD115-21	ENSG00000199833	CTCAATAGGATTACGCTGAGG		0	0	0	0	0	0	0	0	0	0	0	0	0	0	0	0	0	0	0	0	0	0	0	0	0	0	0	124	0	0	0	0	0	0	0	0	0	0	0	0	0	0	0	0	0	0
SNORD115-38	ENSG00000201907	CTCAATAGGATTACGCTGAGG		0	0	0	0	0	0	0	0	0	0	0	0	0	0	0	0	0	0	0	0	0	0	0	0	0	0	0	124	0	0	0	0	0	0	0	0	0	0	0	0	0	0	0	0	0	0
SNORD115-40	ENSG00000272460	CTCAATAGGATTACGCTGAG		0	0	0	0	0	0	0	0	0	0	0	0	0	0	0	0	0	0	0	0	0	0	0	0	0	0	0	124	0	0	0	0	0	0	0	0	0	0	0	0	0	0	0	0	0	0
SNORA50A	ENSG00000281910	AAGCACTGCCTTTGAACCTG		0	0	0	0	0	0	0	0	0	0	0	0	0	0	0	0	0	0	0	0	0	0	0	0	0	0	0	0	0	0	0	0	0	0	0	0	0	0	0	0	135	0	0	0	0	0
SNORD115-42	ENSG00000201143	CTCAATAGGATTACGCTGAG		0	0	0	0	0	0	0	0	0	0	0	0	0	0	0	0	0	0	0	0	0	0	0	0	0	0	0	0	0	0	0	0	0	0	0	0	0	0	0	0	0	0	0	0	0	0
SNORD111	ENSG00000221066	CTGAAATGATGACTCTTTAA		80	0	0	186	0	0	0	0	0	0	254	0	0	0	104	0	0	0	0	155	0	0	0	0	0	0	0	0	0	0	0	0	0	0	0	0	0	0	0	0	0	0	0	0	0	0
SNORD34	ENSG00000202503	CGTCCATGATGTTCCGCAAC		0	0	0	0	0	0	0	0	0	0	160	0	0	0	0	0	0	0	0	0	0	0	0	0	0	0	0	0	0	0	0	0	0	0	0	0	0	0	0	0	0	0	0	0	0	0
SNORD115-1	ENSG00000201831	CTCAATAGGATTACGCTGAG		0	0	0	0	0	0	0	0	0	0	0	0	0	0	0	0	0	0	0	0	0	0	0	0	0	0	0	124	0	0	0	0	0	0	0	0	0	0	0	0	0	0	0	0	0	0
SNORD61	ENSG00000206979	GCTATGATGAATTTGATTGCATTGATC		0	0	0	74	148	0	0	0	176	0	0	142	111	0	0	0	119	104	0	0	0	0	0	0	0	0	0	0	0	268	0	75	0	0	0	0	98	0	0	0	0	0	0	0	0	0
RF00092	ENSG00000201791	GTACTGTTATAACTGAA		0	0	0	0	0	0	0	0	0	0	0	0	0	0	0	0	0	0	0	0	0	0	0	0	0	0	0	0	0	0	0	0	0	0	0	0	0	0	0	0	0	0	0	0	0	0
SNORD42B	ENSG00000238423	GCATATGATGGAAAAGTTTT		0	0	0	0	0	0	0	0	0	0	81	0	0	0	77	0	0	0	0	83	0	0	0	0	0	0	0	0	0	0	0	0	0	0	0	0	0	0	31	0	0	0	0	0	0	0
SNORD20	ENSG00000207280	CTAGATAGTCAAGTTCTGATCC		0	0	0	0	0	0	109	0	0	0	0	0	0	0	0	0	0	0	0	0	0	0	0	0	0	0	0	0	0	0	0	0	0	0	0	0	0	0	0	0	0	0	0	0	0	0
SNORD115-12	ENSG00000199453	CTCAATAGGATTACGCTGAG		0	0	0	0	0	0	0	0	0	0	0	0	0	0	0	0	0	0	0	0	0	0	0	0	0	0	0	124	0	0	0	0	0	0	0	0	0	0	0	0	0	0	0	0	0	0
SNORD115-30	ENSG00000200987	CTCAATAGGATTACGCTGAGG		0	0	0	0	0	0	0	0	0	0	0	0	0	0	0	0	0	0	0	0	0	0	0	0	0	0	0	124	0	0	0	0	0	0	0	0	0	0	0	0	0	0	0	0	0	0
SNORD115-24	ENSG00000200398	CTCAATAGGATTACGCTGAG		0	0	0	0	0	0	0	0	0	0	0	0	0	0	0	0	0	0	0	0	0	0	0	0	0	0	0	124	0	0	0	0	0	0	0	0	0	0	0	0	0	0	0	0	0	0
SNORD53B	ENSG00000265706	TTTCTCTTGGCTGTCTGAG		0	0	0	0	0	0	0	0	0	0	0	0	0	0	0	0	0	0	0	0	0	0	0	0	0	0	0	0	0	0	0	0	0	0	0	0	0	0	0	0	0	0	0	0	0	0
SNORD94	ENSG00000208772	AGACTGTTGCCTCAATCTGAGCC		0	0	0	0	0	0	0	0	0	0	0	0	0	0	0	0	0	0	0	0	0	0	0	0	0	0	0	0	0	0	0	0	0	0	0	0	0	0	0	0	94	0	0	0	0	0
SNORD116-27	ENSG00000251896	CTGTACCACTTCTGTGAGCTGAGGTC		0	0	0	0	0	0	0	0	0	0	0	0	0	0	0	0	0	0	0	0	0	0	0	0	0	0	0	0	0	0	0	0	0	0	0	0	0	0	0	0	75	0	0	0	0	0
SNORD116-9	ENSG00000206727	GATCGATGATGAGTCCCCC		0	0	0	0	0	0	0	0	0	0	64	0	0	0	0	0	0	0	0	0	0	0	0	0	35	0	0	0	0	0	0	0	0	0	0	0	0	0	0	0	0	0	0	0	0	0
SNORD115-40	ENSG00000272460	GGTCGATGATGAGAACCT		0	0	0	0	0	0	0	0	0	0	0	0	0	0	0	0	0	0	0	0	0	0	0	0	0	0	0	0	0	0	0	0	0	0	0	0	0	0	0	0	0	0	0	0	0	0
SNORD115-13	ENSG00000273835	GGTCGATGATGAGAACCT		0	0	0	0	0	0	0	0	0	0	0	0	0	0	0	0	0	0	0	0	0	0	0	0	0	0	0	0	0	0	0	0	0	0	0	0	0	0	0	0	0	0	0	0	0	0
SNORD49A	ENSG00000277370	TGCTCTGATGAAATCACTAAT		0	0	0	0	0	0	0	0	0	0	0	0	0	0	0	0	0	0	0	0	0	0	0	0	0	0	0	0	0	0	0	0	0	0	0	0	0	0	0	0	0	0	0	0	0	0
SNORA24	ENSG00000275994	TTCTGACTTGCACAAGTAACAT		0	0	0	0	0	0	0	0	0	0	0	0	0	0	0	0	0	0	0	0	0	0	0	0	0	0	0	0	0	0	0	0	0	0	0	191	0	0	0	0	0	0	0	0	0	0
SNORD118	ENSG00000200463	GAACATGATGATTGGAGATGCATGA		0	0	0	0	0	0	0	0	0	0	0	0	0	0	0	0	0	0	0	0	0	0	0	0	0	0	0	0	0	0	0	0	0	0	0	0	0	0	0	0	0	0	0	0	0	0
SNORD115-21	ENSG00000199833	GGTCGATGATGAGAACCT		0	0	0	0	0	0	0	0	0	0	0	0	0	0	0	0	0	0	0	0	0	0	0	0	0	0	0	0	0	0	0	0	0	0	0	0	0	0	0	0	0	0	0	0	0	0
SNORD94	ENSG00000208772	AGGCTGTGATGATTGGCGCAG		0	0	0	0	0	0	0	0	0	0	0	0	0	0	0	0	0	0	0	0	0	0	0	0	0	0	0	0	0	0	0	0	0	0	0	0	0	0	0	0	44	0	0	0	0	0
SNORD53	ENSG00000265145	TTTCTCTTGGCTGTCTGAG		0	0	0	0	0	0	0	0	0	0	0	0	0	0	0	0	0	0	0	0	0	0	0	0	0	0	0	0	0	0	0	0	0	0	0	0	0	0	0	0	0	0	0	0	0	0
RF00096	ENSG00000200496	ACCCTGATTGCTCCTATCTG		0	0	0	0	0	0	0	0	0	0	0	0	0	0	0	0	0	0	0	0	0	0	0	0	0	0	0	0	0	0	0	0	0	0	0	0	0	0	0	0	0	0	0	0	0	0
SNORD37	ENSG00000206775	ATTCGTGATGACTGATCATTTCTTCACTT		0	0	0	0	0	0	0	0	0	0	0	0	0	0	0	0	0	0	0	0	0	0	0	0	0	0	0	0	0	0	0	0	0	0	0	0	0	0	0	0	0	0	0	0	0	0
RF01241	ENSG00000253092	AGATGGAGTCTCACTCTGTC		0	0	0	0	0	0	0	0	0	0	0	0	0	0	0	0	0	0	0	0	0	0	0	0	0	0	0	0	0	0	0	0	0	0	0	0	0	0	0	0	0	0	0	0	0	0
SNORD19C	ENSG00000222345	CACTGAGATCCAACTCTGAT		796	736	13312	13784	6094	11956	13194	6461	11224	10301	17316	13460	6510	21428	7070	14741	10908	15297	5516	16329	6668	8591	12776	20100	16624	14059	827	1714	477	159	538	813	1268	725	482	725	454	4141	2707	1024	2585	492	286	350	533	705
SNORD98	ENSG00000283551	ATGCAGTGTGGAACACAATGAACTGAA		1301	1332	1374	1488	697	195	323	909	400	264	2754	323	771	623	1105	1173	331	855	273	1181	593	748	233	1078	917	799	483	2418	1137	387	649	927	1547	918	589	1001	1001	3211	1658	2569	14180	1752	547	919	972	1849
SNORD24	ENSG00000280889	CCACCAAGATCGCTGAT		0	0	0	0	0	0	0	0	0	0	0	0	0	0	0	0	0	0	0	0	0	0	0	0	0	0	0	0	0	0	0	0	0	0	0	0	0	0	0	0	0	0	0	0	0	0
SNORD116-25	ENSG00000252326	ACTTCTGTGAGCTGAGGTC		0	0	0	0	0	0	0	0	0	0	0	0	0	0	0	0	0	0	0	0	0	0	0	0	0	0	0	0	0	0	0	0	0	0	0	0	0	0	0	0	0	0	0	0	0	0
SNORA44	ENSG00000273544	CTGGAAAGACTTTGACAGCG		0	0	0	0	0	0	0	0	0	0	79	0	0	0	0	0	0	0	0	0	0	0	0	0	0	0	0	0	0	0	0	0	0	0	0	0	0	0	0	0	40	0	0	0	0	0
SNORD114-17	ENSG00000201569	AATGATATGTGTCTGAAACTCTGAG		0	0	0	0	0	0	0	0	0	0	0	0	0	0	0	0	0	0	0	0	0	0	0	0	0	0	0	0	0	0	0	0	0	0	0	0	0	0	0	0	99	0	0	0	0	0
SNORD116-29	ENSG00000207245	GACACTTCTGTGAGCTGA		0	0	0	0	0	0	0	0	0	0	0	0	0	0	0	0	0	0	0	0	0	0	0	0	0	0	0	0	0	0	0	0	0	0	0	0	0	0	0	0	0	0	0	0	0	0
SNORD116-30	ENSG00000252277	AGTGACCAAACCACTTC		0	0	0	0	0	0	0	0	0	0	0	0	0	0	0	0	0	0	0	0	0	0	0	0	0	0	0	0	0	0	0	0	0	0	0	0	0	0	0	0	0	0	0	0	0	0
SNORD116-26	ENSG00000251815	GTGCCACTTCTGTGAGCTG		0	0	0	0	0	0	0	0	0	0	0	0	0	0	0	0	0	0	0	0	0	0	0	0	0	0	0	0	0	0	0	0	0	0	0	0	0	0	0	0	0	0	0	0	0	0
SNORD114-6	ENSG00000201263	TCTGGAACTCTGAGG		0	0	0	0	0	0	0	0	0	0	0	0	0	0	0	0	0	0	0	0	0	0	0	0	0	0	0	0	0	0	0	0	0	0	0	0	0	0	0	0	0	0	0	0	0	0
SNORD113-8	ENSG00000200367	CATCTGTAACTCTGAG		0	0	0	0	0	0	0	0	0	0	0	0	0	0	0	0	0	0	0	0	0	0	0	0	0	0	0	0	0	0	0	0	0	0	0	0	0	0	0	0	0	0	0	0	0	0
SNORD114-5	ENSG00000199798	TGTCTAGAACTCTGAG		0	0	0	0	0	0	0	0	0	0	0	0	0	0	0	0	0	0	0	0	0	0	0	0	0	0	0	0	0	0	0	0	0	0	0	0	0	0	0	0	0	0	0	0	0	0
SNORD114-28	ENSG00000200480	GTGTCTAGAACTCTGAG		0	0	0	0	0	0	0	0	0	0	0	0	0	0	0	0	0	0	0	0	0	0	0	0	0	0	0	0	0	0	0	0	0	0	0	0	0	0	0	0	0	0	0	0	0	0
SNORD114-14	ENSG00000199593	TGTCTAGAACTCTGAG		0	0	0	0	0	0	0	0	0	0	0	0	0	0	0	0	0	0	0	0	0	0	0	0	0	0	0	0	0	0	0	0	0	0	0	0	0	0	0	0	0	0	0	0	0	0
SNORD114-25	ENSG00000200612	GTGTCTAGAACTCTGAG		0	0	0	0	0	0	0	0	0	0	0	0	0	0	0	0	0	0	0	0	0	0	0	0	0	0	0	0	0	0	0	0	0	0	0	0	0	0	0	0	0	0	0	0	0	0
SNORD88C	ENSG00000220988	TGACACCTGGGGGTCTGAG		0	0	0	0	0	0	110	0	0	0	0	0	0	0	0	0	0	0	0	0	0	0	0	0	0	0	0	0	0	0	0	0	0	0	0	0	0	0	0	0	0	0	0	0	0	0
RF00279	ENSG00000200422	GGTCAATGATGTAATGGCATGTATTAGC		0	0	0	0	0	0	0	0	0	0	0	0	0	0	0	0	0	0	0	0	0	0	0	0	0	0	0	0	0	0	0	0	0	0	0	0	0	0	0	0	111	0	0	0	0	0
SNORD45B	ENSG00000201487	GGTCAATGATGTAATGGCATGTATTAGCT		0	0	0	0	0	0	0	0	0	0	0	0	0	0	0	0	0	0	0	0	0	0	0	0	0	0	0	0	0	0	0	0	0	0	0	0	0	0	0	0	112	0	0	0	0	0
RF00279	ENSG00000200706	GGTCAATGATGTAATGGCATGTATTAGC		0	0	0	0	0	0	0	0	0	0	0	0	0	0	0	0	0	0	0	0	0	0	0	0	0	0	0	0	0	0	0	0	0	0	0	0	0	0	0	0	111	0	0	0	0	0
SNORA48	ENSG00000209582	CCTGGTTCATGCCTTGGACACATA		0	0	0	0	0	0	0	0	0	0	0	0	0	0	0	0	0	0	0	0	0	0	0	0	0	0	0	0	0	0	0	0	0	0	0	0	0	0	0	0	114	0	0	0	0	0
SCARNA10	ENSG00000239002	AACACAGATCTTTGGTAATCTGATG		0	0	0	0	0	0	0	0	0	0	0	0	0	0	0	0	0	0	0	0	0	0	0	0	0	0	0	0	0	0	0	0	0	0	0	0	0	0	0	0	180	0	0	0	0	0
SNORD125	ENSG00000239127	CTCTAAGAAGTTGACTGAA		0	0	0	0	0	0	0	0	0	0	0	0	0	0	0	0	0	0	0	0	0	0	0	0	0	0	0	0	0	0	0	0	0	0	0	0	0	0	0	0	0	0	0	0	0	0
RF00096	ENSG00000212144	ACCCTGATTGCTCCTATCTG		0	0	0	0	0	0	0	0	0	0	0	0	0	0	0	0	0	0	0	0	0	0	0	0	0	0	0	0	0	0	0	0	0	0	0	0	0	0	0	0	0	0	0	0	0	0
SNORD111	ENSG00000221066	GTTTTTGCCTTATGAATCTGA		71	0	0	0	0	0	0	0	0	0	0	0	0	0	0	0	0	0	0	0	0	0	0	0	0	0	0	0	0	0	0	0	0	0	0	0	0	0	0	0	0	0	0	0	0	0
SNORD19	ENSG00000212493	TTAGATCCAACTCTGA		0	0	0	0	0	0	0	0	0	0	108	0	0	0	0	0	0	0	0	0	0	0	0	171	129	0	0	0	0	0	0	0	0	0	0	0	0	0	0	0	0	0	0	0	0	0
SNORA65	ENSG00000201302	CTCTGTGCCGAAAGCATGGGAACAGC		0	0	0	0	0	0	0	0	0	0	74	0	0	0	0	0	0	0	0	0	0	0	0	0	0	0	0	0	0	0	0	0	0	0	0	0	0	0	0	0	0	0	0	0	0	0
SNORA71D	ENSG00000200354	AACTCTGGAGCTTTCTCAC		0	0	0	0	0	0	0	0	0	0	0	0	0	0	0	0	0	0	0	0	0	0	0	0	0	0	0	0	0	0	0	0	0	0	0	0	0	0	0	0	0	0	0	0	0	0
SNORA20	ENSG00000207392	TTCCCATTTATTTGCTGCTTG		0	0	0	0	0	0	0	0	0	0	0	0	0	0	146	0	0	0	0	126	0	0	0	0	0	0	0	0	0	0	0	0	0	0	0	0	0	0	0	0	0	0	0	0	0	0
SNORD115-33	ENSG00000200593	TGTCCTGAAGAGCGGTGATGA		0	0	0	0	0	0	0	0	0	0	0	0	0	0	0	0	0	0	0	0	0	0	0	0	0	0	0	0	0	0	0	0	0	0	0	0	0	0	0	0	0	0	0	0	0	0
SNORD115-44	ENSG00000202261	TGTCCTGAAGAGCGGTGATGA		0	0	0	0	0	0	0	0	0	0	0	0	0	0	0	0	0	0	0	0	0	0	0	0	0	0	0	0	0	0	0	0	0	0	0	0	0	0	0	0	0	0	0	0	0	0
SNORD126	ENSG00000238344	CTGATTAAACACATGCTCTGA		0	0	0	0	0	0	0	0	0	0	0	0	0	0	0	0	0	0	0	0	0	0	0	0	0	0	0	0	0	0	0	0	0	0	0	0	0	0	0	0	116	0	0	0	0	0
SNORD105B	ENSG00000238531	CTCTGTCCAAAGTAAACGCCCTGAC		0	0	0	0	0	0	0	0	0	0	0	0	0	0	0	0	0	0	0	0	0	0	0	0	0	0	0	0	0	0	0	0	0	0	0	0	0	0	0	0	94	0	0	0	0	0
SNORD49A	ENSG00000277370	GACGAAGACTACTCCTGTCTGA		0	0	0	0	0	0	0	0	0	0	0	0	0	0	0	0	0	0	0	0	0	0	0	0	0	0	0	0	0	0	0	0	0	0	0	0	0	0	0	0	0	0	0	0	0	0
SNORA20B	ENSG00000206947	CTTCTGCATGGACTAGACATT		0	0	0	0	0	0	0	0	0	0	0	0	0	0	0	0	0	0	0	0	0	0	0	0	0	0	0	0	0	0	0	0	0	0	0	0	0	0	0	0	0	0	0	0	0	0
SNORD27	ENSG00000275996	TCAAGTGATGTCATCTTACTACTGAG		1515	820	830	981	446	167	271	474	323	252	1352	277	421	446	665	815	245	510	173	1032	397	515	292	917	965	735	363	1977	549	0	481	593	1318	674	288	565	523	1429	642	916	18945	955	317	521	719	1254
SNORD57	ENSG00000226572	AAAACTGATTTAATGAGCC		0	0	0	0	0	0	50	0	0	0	0	0	0	0	0	0	0	0	0	0	0	0	0	0	0	0	0	0	0	0	0	0	0	0	0	0	0	0	0	0	0	0	0	0	0	0
SNORD116-14	ENSG00000206621	GATCGATGATGACTTCCATATATACATTC		0	0	0	0	0	0	0	0	0	0	0	0	0	0	0	0	0	0	0	0	0	0	0	0	0	0	0	0	0	0	0	0	0	0	0	0	0	0	0	0	0	0	0	0	0	0
SNORD73A	ENSG00000208797	GCCAGTGATAACAACATTTTTC		0	0	0	0	0	0	0	0	0	0	0	0	0	0	0	0	0	0	0	0	0	0	0	0	0	0	0	109	0	0	0	0	0	0	0	0	0	0	0	0	0	0	0	0	0	0
SNORD116-15	ENSG00000207174	GATCGATGATGACTTCCATATATACATTC		0	0	0	0	0	0	0	0	0	0	0	0	0	0	0	0	0	0	0	0	0	0	0	0	0	0	0	0	0	0	0	0	0	0	0	0	0	0	0	0	0	0	0	0	0	0
SNORA21	ENSG00000199293	CAATCGGTGGTGTGACAAG		0	0	0	0	0	0	0	0	0	0	0	0	0	0	0	0	0	0	0	0	0	0	0	0	0	0	0	0	0	0	0	0	0	0	0	0	0	0	0	0	0	0	0	0	0	0
SNORA61	ENSG00000278274	ATGTGGGCTAGTTTCAGACAGG		0	0	0	0	0	0	0	0	0	0	0	0	0	0	0	0	0	0	0	0	0	0	0	0	0	0	0	0	0	0	0	0	0	0	0	0	0	0	0	0	0	0	0	0	0	0
SNORD14A	ENSG00000272034	TCACTATGATGATTGGTTGCCAG		0	0	0	0	0	0	0	0	0	0	0	0	0	0	0	0	0	0	0	0	0	0	0	0	0	0	0	0	0	0	0	0	0	0	0	0	0	0	0	0	0	0	0	0	0	0
RF00537	ENSG00000283675	GTCGCCCAGGCTGGAG		0	0	0	0	0	0	0	0	0	0	0	0	0	0	0	0	0	0	0	0	0	0	0	0	0	0	0	0	0	0	0	0	0	0	0	0	0	0	0	0	0	0	0	0	0	0
RF00407	ENSG00000281311	CTTTTTAACCGCGAGCGACAAG		0	0	0	0	0	0	0	0	0	0	0	0	0	0	0	0	0	0	0	0	0	0	0	0	0	0	0	0	0	0	0	0	0	0	0	0	0	0	0	0	0	0	0	0	0	0
SNORD52	ENSG00000265707	GGGAATGATGATTTCACAGAC		0	0	0	0	0	0	0	0	0	0	0	0	0	0	0	0	0	0	0	0	0	0	0	0	0	0	0	0	0	0	0	0	0	0	0	0	0	0	0	0	0	0	0	0	0	0
SNORA58B	ENSG00000201129	GATAAATTGCACAACTCTCAC		0	0	0	0	0	0	0	0	0	0	0	0	0	0	0	0	0	0	0	0	0	0	0	0	0	0	0	0	0	0	0	0	0	0	0	0	0	0	0	0	0	0	0	0	0	0
SNORA74A	ENSG00000200959	TCCAGCGGTTGTCAGCTATCCAGG		0	0	0	0	0	0	0	0	0	0	0	0	0	0	0	0	0	0	0	0	0	0	0	0	0	0	0	0	0	0	0	0	0	0	0	0	0	0	0	0	137	0	0	0	0	0
SNORD91B	ENSG00000275084	AATGTCTGAACCTGTCTGAAG		0	0	0	0	0	0	0	0	0	0	0	0	0	0	0	0	0	0	0	0	0	0	0	0	0	0	0	0	0	0	0	0	0	0	0	0	0	0	0	0	0	0	0	0	0	0
RF00096	ENSG00000200026	GAACATGATGATTGGAGATGCATG		0	0	0	0	0	0	0	0	0	0	0	0	0	0	0	0	0	0	0	0	0	0	0	0	0	0	0	0	0	0	0	0	0	0	0	0	0	0	0	0	0	0	0	0	0	0
SNORD55	ENSG00000264294	GTGTATGATGACAACTCGG		0	0	0	0	0	0	0	0	0	0	0	0	0	0	0	0	0	0	0	0	0	0	0	0	0	0	0	0	0	0	0	0	0	0	0	0	0	0	0	0	0	0	0	0	0	0
SNORD16	ENSG00000199673	TTGCGTCTTACTCTGTTCTCAGCG		0	0	0	0	0	0	0	0	0	0	0	0	0	0	0	0	0	0	0	0	0	0	0	0	0	0	0	0	0	0	0	0	0	0	0	0	0	0	0	0	0	0	0	0	0	0
SNORD116-23	ENSG00000207375	TTGGAAAGCTGAACAAAATGAGTG		0	0	0	0	0	0	0	0	0	0	0	0	0	0	0	0	0	0	0	0	0	0	0	0	0	0	0	0	0	0	0	0	0	0	0	0	0	0	0	0	0	0	0	0	0	0
SNORA54	ENSG00000273525	AGTTTCAGGTCTTGGAGACAAA		0	0	0	0	0	0	0	0	0	0	0	0	0	0	0	0	0	0	0	0	0	0	0	0	0	0	0	0	0	0	0	0	0	0	0	0	0	0	0	0	0	0	0	0	0	0
SNORD83B	ENSG00000209480	CTTGTTGCCTTCCTTCTGAGAA		0	0	0	0	0	0	0	0	0	0	0	0	0	0	0	0	0	0	0	0	0	0	0	0	0	0	0	0	0	0	0	0	0	0	0	0	0	0	0	0	0	0	0	0	0	0
SNORD89	ENSG00000212283	GCGAACCACTAGTCTGAC		0	0	0	0	0	0	0	0	0	0	0	0	0	0	0	0	0	0	0	0	0	0	0	0	0	0	0	33	0	0	0	0	0	0	0	0	0	0	0	0	90	0	0	0	0	0
SNORD58A	ENSG00000206602	AATTAATAAATTCTGAGCA		0	0	0	0	0	0	0	0	0	0	0	0	0	0	0	0	0	0	0	0	0	0	0	0	0	0	0	0	0	0	0	0	0	0	0	0	0	0	0	0	0	0	0	0	0	0
SNORD3G	ENSG00000199666	CCATTGATGATCGTTCTTC		0	0	0	0	0	0	168	0	0	0	0	0	0	0	0	0	0	0	0	0	0	0	0	0	0	0	0	0	0	0	0	0	0	0	0	0	0	0	0	0	0	0	0	0	0	0
RF00012	ENSG00000202233	CCATTGATGATCGTTCTTC		0	0	0	0	0	0	167	0	0	0	0	0	0	0	0	0	0	0	0	0	0	0	0	0	0	0	0	0	0	0	0	0	0	0	0	0	0	0	0	0	0	0	0	0	0	0
SNORD101	ENSG00000206754	TTTTATGAGTGAAACATAAGAGTCTGA		0	0	0	0	0	0	0	0	0	0	0	0	0	0	0	0	0	0	0	0	0	0	0	0	0	0	0	0	0	0	0	0	0	0	0	0	0	0	0	0	0	0	0	0	0	0
SNORD33	ENSG00000199631	CCACATGCACTACCATCTGAGG		0	0	0	0	0	0	0	0	0	0	0	0	0	0	0	0	0	0	0	0	0	0	0	0	0	0	0	0	0	0	0	0	0	0	0	0	0	0	0	0	0	0	0	0	0	0
SNORD115-15	ENSG00000201679	GGTCGATGATGAGAACCT		0	0	0	0	0	0	0	0	0	0	0	0	0	0	0	0	0	0	0	0	0	0	0	0	0	0	0	0	0	0	0	0	0	0	0	0	0	0	0	0	0	0	0	0	0	0
SNORD115-10	ENSG00000201943	GGTCGATGATGAGAACCT		0	0	0	0	0	0	0	0	0	0	0	0	0	0	0	0	0	0	0	0	0	0	0	0	0	0	0	0	0	0	0	0	0	0	0	0	0	0	0	0	0	0	0	0	0	0
SNORD115-42	ENSG00000201143	GGTCGATGATGAGAACCT		0	0	0	0	0	0	0	0	0	0	0	0	0	0	0	0	0	0	0	0	0	0	0	0	0	0	0	0	0	0	0	0	0	0	0	0	0	0	0	0	0	0	0	0	0	0
RF00156	ENSG00000200237	CTCTAAGGGACCTTGGAGACAG		0	0	0	0	0	0	0	0	0	0	0	0	0	0	0	0	0	0	0	0	0	0	0	0	0	0	0	0	0	0	0	0	0	0	0	0	0	0	0	0	0	0	0	0	0	0
SNORA70B	ENSG00000206937	CTCTAAGGGACCTTGGAGACAG		0	0	0	0	0	0	0	0	0	0	0	0	0	0	0	0	0	0	0	0	0	0	0	0	0	0	0	0	0	0	0	0	0	0	0	0	0	0	0	0	0	0	0	0	0	0
RF00156	ENSG00000206661	CTCTAAGGGACCTTGGAGACAG		0	0	0	0	0	0	0	0	0	0	0	0	0	0	0	0	0	0	0	0	0	0	0	0	0	0	0	0	0	0	0	0	0	0	0	0	0	0	0	0	0	0	0	0	0	0
RF00156	ENSG00000207098	CTCTAAGGGACCTTGGAGACAG		0	0	0	0	0	0	0	0	0	0	0	0	0	0	0	0	0	0	0	0	0	0	0	0	0	0	0	0	0	0	0	0	0	0	0	0	0	0	0	0	0	0	0	0	0	0
RF00156	ENSG00000202389	CTCTAAGGGACCTTGGAGACAG		0	0	0	0	0	0	0	0	0	0	0	0	0	0	0	0	0	0	0	0	0	0	0	0	0	0	0	0	0	0	0	0	0	0	0	0	0	0	0	0	0	0	0	0	0	0
SNORA70	ENSG00000207165	CTCTAAGGGACCTTGGAGACAGG		0	0	0	0	0	0	0	0	0	0	0	0	0	0	0	0	0	0	0	0	0	0	0	0	0	0	0	0	0	0	0	0	0	0	0	0	0	0	0	0	0	0	0	0	0	0
RF00156	ENSG00000201945	CTCTAAGGGACCTTGGAGACAG		0	0	0	0	0	0	0	0	0	0	0	0	0	0	0	0	0	0	0	0	0	0	0	0	0	0	0	0	0	0	0	0	0	0	0	0	0	0	0	0	0	0	0	0	0	0
RF00156	ENSG00000252258	TGGGTTGCTCTAAGGGACCTTG		0	0	0	0	0	0	0	0	0	0	0	0	0	0	0	0	0	0	0	0	0	0	0	0	0	0	0	0	0	0	0	0	0	0	0	0	0	0	0	0	0	0	0	0	0	0
SNORA17B	ENSG00000280496	CTGTCCTGGACCTGTTGGCACCA		0	0	0	0	0	0	0	0	0	0	0	0	0	0	0	0	0	0	0	0	0	0	0	0	0	0	0	0	0	0	0	0	0	0	0	0	0	0	0	0	0	0	0	0	0	0
SNORA57	ENSG00000206597	CTATCCTCAAACGCCGGGACAC		0	0	0	0	0	0	0	0	0	0	0	0	0	0	0	0	0	0	0	0	0	0	0	0	0	0	0	0	0	0	0	0	0	0	0	0	0	0	0	0	0	0	0	0	0	0
SNORA64	ENSG00000207405	CTTTCCTTGAGGGGTGCAACAGG		0	0	0	0	0	0	0	0	0	0	0	0	0	0	0	0	0	0	0	0	0	0	0	0	0	0	0	0	0	0	0	0	0	0	0	0	0	0	0	0	0	0	0	0	0	0
SNORA50C	ENSG00000277887	CTTTTTAACCGCGAGCGACAAG		0	0	0	0	0	0	0	0	0	0	0	0	0	0	0	0	0	0	0	0	0	0	0	0	0	0	0	0	0	0	0	0	0	0	0	0	0	0	0	0	0	0	0	0	0	0
SNORA81	ENSG00000221420	CAGCACTAGATTGTAAAGACTGGGGTGGA		0	0	0	0	0	0	0	0	0	0	0	0	0	0	0	0	0	0	0	0	0	0	0	0	0	0	0	0	0	0	0	0	0	0	0	0	0	0	0	0	0	0	0	0	0	0
SNORD48	ENSG00000201823	AGTGATGATGACCCCAG		0	0	0	0	0	0	0	0	0	0	0	0	0	70	0	0	0	0	0	0	0	0	0	0	0	0	0	0	0	0	0	0	0	0	0	0	0	0	0	0	0	0	0	0	0	0
SNORD116-6	ENSG00000207442	GATCGATGATGAGTCCTC		0	0	0	0	0	0	0	0	0	0	0	0	0	0	0	0	0	0	0	0	0	0	0	0	0	0	0	0	0	0	0	0	0	0	0	0	0	0	0	0	0	0	0	0	0	0
SNORA44	ENSG00000273544	GCTGCCACTCAGCTTTCCTATAA		0	0	0	0	0	0	0	0	0	0	0	0	0	0	0	0	0	0	0	0	0	0	0	0	0	0	0	0	0	0	0	0	0	0	0	0	0	0	0	0	0	0	0	0	0	0
SNORD3H	ENSG00000207215	TGCCATTGATGATCGTTC		0	0	0	0	0	0	0	0	0	0	0	0	0	0	0	0	0	0	0	0	0	0	0	0	0	0	0	0	0	0	0	0	0	0	0	0	0	0	0	0	0	0	0	0	0	0
SNORA7A	ENSG00000207496	GACCTCCTGGGATCGCATCTGGA		0	0	0	0	0	0	0	0	0	0	0	0	0	0	0	0	0	0	0	0	0	0	0	0	0	0	0	0	0	0	0	0	0	0	0	0	0	0	0	0	0	0	0	0	0	0
SNORD34	ENSG00000202503	TGAAAGCAGCACTGGCTGAGA		0	0	0	0	0	0	0	0	0	0	0	0	0	0	0	0	0	0	0	0	0	0	0	0	0	0	0	0	0	0	0	0	0	0	0	0	0	0	0	0	0	0	0	0	0	0
SNORA20	ENSG00000207392	CTTCTGCAGGGACTAGACATT		0	0	0	0	0	0	0	0	0	0	0	0	0	0	0	0	0	0	0	0	0	0	0	0	0	0	0	0	0	0	0	0	0	0	0	0	0	0	0	0	0	0	0	0	0	0
SNORD46	ENSG00000200913	GTAGGGTGATGAAAAAG		0	0	0	0	0	0	0	0	0	0	0	0	0	0	0	0	0	0	0	0	0	0	0	0	0	0	0	0	0	0	0	0	0	0	0	0	0	0	0	0	0	0	0	0	0	0
SNORD91A	ENSG00000212163	TCGTCTGAACCTGTCTGAAG		0	0	0	0	0	0	0	0	0	0	0	0	0	0	0	0	0	0	0	0	0	0	0	0	0	0	0	0	0	0	0	0	0	0	0	0	0	0	0	0	0	0	0	0	0	0
SNORA48	ENSG00000209582	TGTCCCTGACCTGGGTAG		0	0	0	0	0	0	0	0	0	0	0	0	0	0	0	0	0	0	0	0	0	0	0	0	0	0	0	0	0	0	0	0	0	0	0	0	0	0	0	0	0	0	0	0	0	0
SNORD71	ENSG00000223224	TTGGAGGATGAAAGTACGGA		0	0	0	0	0	0	0	0	0	0	0	0	0	0	0	0	0	0	0	0	0	0	0	0	0	0	0	0	0	0	0	0	0	0	0	0	0	0	0	0	0	0	0	0	0	0
SNORD91B	ENSG00000275084	CCCAGTGATGCAACTTCTGTGTGATACTGAGGC		0	0	0	0	0	0	0	0	0	0	0	0	0	0	0	0	0	0	0	0	0	0	0	0	0	0	0	0	0	0	0	0	0	0	0	0	0	0	0	0	114	0	0	0	0	0
SNORD1C	ENSG00000274091	TTTTGTGAGGAGGTCTGACTTGCTGAG		0	0	0	0	0	0	0	0	0	0	0	0	0	0	0	0	0	0	0	0	0	0	0	0	0	0	0	0	0	0	0	0	0	0	0	0	0	0	0	0	123	0	0	0	0	0
SNORD17	ENSG00000212232	CACAAAGATGAGTGGTGAAAATCTGAT		0	0	0	0	0	0	0	0	0	0	0	0	0	0	0	0	0	0	0	0	0	0	0	0	0	0	0	0	0	0	0	0	0	0	0	0	0	0	0	0	91	0	0	0	0	0
SNORD116-15	ENSG00000207174	TTGGAAAGCTGAACAAAATGAGTG		0	0	0	0	0	0	0	0	0	0	0	0	0	0	0	0	0	0	0	0	0	0	0	0	0	0	0	0	0	0	0	0	0	0	0	0	0	0	0	0	0	0	0	0	0	0
SNORD125	ENSG00000239127	CCTCCTGATGATTCTTCTTCCTGAG		0	0	0	0	0	0	0	0	0	0	0	0	0	0	0	0	0	0	0	0	0	0	0	0	0	0	0	0	0	0	0	0	0	0	0	0	0	0	0	0	0	0	0	0	0	0
SNORD55	ENSG00000264294	AGCCAACCTTGGAGAGCTGA		0	0	0	0	0	0	0	0	0	0	0	0	0	0	0	0	0	0	0	0	0	0	0	0	0	0	0	0	0	0	0	0	0	0	0	0	0	0	0	0	0	0	0	0	0	0
SNORD15A	ENSG00000206941	GACTTAGAGGCATTTGTCTGAGAA		0	0	0	0	0	0	0	0	0	0	0	0	0	0	0	0	0	0	0	0	0	0	0	0	0	0	0	0	0	0	0	0	0	0	0	0	0	0	0	0	0	0	0	0	0	0
SNORD97	ENSG00000238622	GCCCGATGATTATAAAAAGACG		0	0	0	0	0	0	0	0	0	0	0	0	0	0	0	0	0	0	0	0	0	0	0	0	0	0	0	0	0	0	0	0	0	0	0	0	0	0	0	0	0	0	0	0	0	0
RF00012	ENSG00000200492	AAGTTTCTCTGAATGTGTAG		0	0	0	0	0	0	0	0	0	0	0	0	0	0	0	0	0	0	0	0	0	0	0	0	0	0	0	0	0	0	0	0	0	0	0	0	0	0	0	0	0	0	0	0	0	0
RF00012	ENSG00000277754	AAGTTTCTCTGAATGTGTAG		0	0	0	0	0	0	0	0	0	0	0	0	0	0	0	0	0	0	0	0	0	0	0	0	0	0	0	0	0	0	0	0	0	0	0	0	0	0	0	0	0	0	0	0	0	0
SNORA1	ENSG00000206834	GTGACAATGAGACCTGTAACATT		0	0	0	0	0	0	0	0	0	0	0	0	0	0	0	0	0	0	0	0	0	0	0	0	0	0	0	0	0	0	0	0	0	0	0	0	0	0	0	0	0	0	0	0	0	0
RF00153	ENSG00000199411	ACTGTGGACTCAATAG		0	0	0	0	0	0	0	0	0	0	0	0	0	0	0	0	0	0	0	0	0	0	0	0	0	0	0	0	0	0	0	0	0	0	0	0	0	0	0	0	0	0	0	0	0	0
SNORA18	ENSG00000207145	GTGGGAAGGAATTACAAGACAGT		0	0	0	0	0	0	0	0	0	0	0	0	0	0	0	0	0	0	0	0	0	0	0	0	0	0	0	0	0	0	0	0	0	0	0	0	0	0	0	0	0	0	0	0	0	0
SNORA71D	ENSG00000200354	CGAAAGTGATCGTGGGCTG		0	0	0	0	0	0	0	0	0	0	0	0	0	0	0	0	0	0	0	0	0	0	0	0	0	0	0	0	0	0	0	0	0	0	0	0	0	0	0	0	0	0	0	0	0	0
SNORA46	ENSG00000207493	CTGTATAGAGTTAAGGAACATG		0	0	0	0	0	0	0	0	0	0	0	0	0	0	0	0	0	0	0	0	0	0	0	0	0	0	0	0	0	0	0	0	0	0	0	0	0	0	0	0	0	0	0	0	0	0
SNORD49B	ENSG00000277108	CGTCTAATGTCTATCTGAC		0	0	0	0	0	0	0	0	0	0	0	0	0	0	0	0	0	0	0	0	0	0	0	0	0	0	0	0	0	0	0	0	0	0	0	0	0	0	0	0	0	0	0	0	0	0
SNORA2B	ENSG00000207313	TTCATTAGAAAGAAACAT		0	0	0	0	0	0	0	0	0	0	0	0	0	0	0	0	0	0	0	0	0	0	0	0	0	0	0	0	0	0	0	0	0	0	0	0	0	0	0	0	0	0	0	0	0	0
RF00493	ENSG00000201882	CTACACTTGACCTGAGCT		0	0	0	0	0	0	0	0	0	0	0	0	0	0	0	0	0	0	0	0	0	0	0	0	0	0	0	0	0	0	0	0	0	0	0	0	0	0	0	0	0	0	0	0	0	0
SNORD104	ENSG00000199753	GCTGTGATGACATTCCAA		0	0	0	0	0	0	0	0	0	0	0	0	0	0	0	0	0	0	0	0	0	0	0	0	0	0	0	0	0	0	0	0	0	0	0	0	0	0	0	0	0	0	0	0	0	0
SNORA7B	ENSG00000207088	ACCTCCTGGGATCGCATCTG		0	0	0	0	0	0	0	0	0	0	0	0	0	0	0	0	0	0	0	0	0	0	0	0	0	0	0	0	0	0	0	0	0	0	0	0	0	0	0	0	0	0	0	0	0	0
SNORD62A	ENSG00000235284	CTCAGTGATGTAATTCCAATAGATCCTT		0	0	0	0	0	0	0	0	0	0	0	0	0	0	0	0	0	0	0	0	0	0	0	0	0	0	0	0	0	0	0	0	0	0	0	0	0	0	0	0	0	0	0	0	0	0
RF01848	ENSG00000277492	AAGACTATACTTTCAGGGATC		0	0	0	0	0	0	0	0	0	0	0	0	0	0	0	0	0	0	0	0	0	0	0	0	0	0	0	0	0	0	0	0	0	0	0	0	0	0	0	0	0	0	0	0	0	0
SNORD3E	ENSG00000280704	AAGACTATACTTTCAGGGATC		0	0	0	0	0	0	0	0	0	0	0	0	0	0	0	0	0	0	0	0	0	0	0	0	0	0	0	0	0	0	0	0	0	0	0	0	0	0	0	0	0	0	0	0	0	0
SNORA65	ENSG00000201302	TGCACCTGACCAGGTCTCTGTTGG		0	0	0	0	0	0	0	0	0	0	0	0	0	0	0	0	0	0	0	0	0	0	0	0	0	0	0	0	0	0	0	0	0	0	0	0	0	0	0	0	0	0	0	0	0	0
SNORD115-19	ENSG00000199968	GGTCGATGATGAGAACC		0	0	0	0	0	0	0	0	0	0	0	0	0	0	0	0	0	0	0	0	0	0	0	0	0	0	0	0	0	0	0	0	0	0	0	0	0	0	0	0	0	0	0	0	0	0
SNORD115-12	ENSG00000199453	GGTCGATGATGAGAACCT		0	0	0	0	0	0	0	0	0	0	0	0	0	0	0	0	0	0	0	0	0	0	0	0	0	0	0	0	0	0	0	0	0	0	0	0	0	0	0	0	0	0	0	0	0	0
SNORD115-20	ENSG00000201969	GGTCGATGATGAGAACC		0	0	0	0	0	0	0	0	0	0	0	0	0	0	0	0	0	0	0	0	0	0	0	0	0	0	0	0	0	0	0	0	0	0	0	0	0	0	0	0	0	0	0	0	0	0
SNORA73A	ENSG00000274266	AGACAAACCATGCAGGAAACAG		0	0	0	0	0	0	0	0	0	0	0	0	0	0	0	0	0	0	0	0	0	0	0	0	0	0	0	0	0	0	0	0	0	0	0	0	0	0	0	0	0	0	0	0	0	0
SNORD88A	ENSG00000221241	TTTGACACCCGGGGGTCT		0	0	0	0	0	0	0	0	0	0	0	0	0	0	0	0	0	0	0	0	0	0	0	0	0	0	0	0	0	0	0	0	0	0	0	0	0	0	0	0	0	0	0	0	0	0
SNORD105	ENSG00000209645	CAAAGTAAACGCTCTGA		0	0	0	0	0	0	0	0	0	0	0	0	0	0	0	0	0	0	0	0	0	0	0	0	0	0	0	0	0	0	0	0	0	0	0	0	0	0	0	0	0	0	0	0	0	0
SNORA75	ENSG00000206885	TTAGCTGTATTGTGAGACATT		0	0	0	0	0	0	0	0	0	0	0	0	0	0	0	0	0	0	0	0	0	0	0	0	0	0	0	0	0	0	0	0	0	0	0	0	0	0	0	0	0	0	0	0	0	0
SNORD97	ENSG00000238622	TGTCCAGCGTCCTGTGAGCGAAGAT		0	0	0	0	0	0	0	0	0	0	0	0	0	0	0	0	0	0	0	0	0	0	0	0	0	0	0	0	0	0	0	0	0	0	0	0	0	0	0	0	0	0	0	0	0	0
RF00416	ENSG00000252461	CTTGAACTCCTGACCT		0	0	0	0	0	0	0	0	0	0	0	0	0	0	0	0	0	0	0	0	0	0	0	0	0	0	0	0	0	0	0	0	0	0	0	0	0	0	0	0	0	0	0	0	0	0
SNORA80E	ENSG00000207475	GTGGGCTGTGAGCACTGAAGGG		0	0	0	0	0	0	0	0	0	0	0	0	0	0	0	0	0	0	0	0	0	0	0	0	0	0	0	0	0	0	0	0	0	0	0	0	0	0	0	0	0	0	0	0	0	0
SNORA51	ENSG00000271798	TGTATTGTGAATGGGGGAACAT		0	0	0	0	0	0	0	0	0	0	0	0	0	0	0	0	0	0	0	0	0	0	0	0	0	0	0	0	0	0	0	0	0	0	0	0	0	0	0	0	0	0	0	0	0	0
SNORA80B	ENSG00000206633	CACTGAAGTGGGTTGCACAG		0	0	0	0	0	0	0	0	0	0	0	0	0	0	0	0	0	0	0	0	0	0	0	0	0	0	0	0	0	0	0	0	0	0	0	0	0	0	0	0	0	0	0	0	0	0
SNORA10	ENSG00000206811	CTGTTCCTAGGAGTGCGACAAT		0	0	0	0	0	0	0	0	0	0	0	0	0	0	0	0	0	0	0	0	0	0	0	0	0	0	0	0	0	0	0	0	0	0	0	0	0	0	0	0	0	0	0	0	0	0
SNORA36C	ENSG00000207016	TTCCAAAGTGTTGAGTTCAGTCCA		0	0	0	0	0	0	0	0	0	0	0	0	0	0	0	0	0	0	0	0	0	0	0	0	0	0	0	0	0	0	0	0	0	0	0	0	0	0	0	0	0	0	0	0	0	0
SNORA36A	ENSG00000206948	TTCCAAAGTGTTGAGTTCAGTCCA		0	0	0	0	0	0	0	0	0	0	0	0	0	0	0	0	0	0	0	0	0	0	0	0	0	0	0	0	0	0	0	0	0	0	0	0	0	0	0	0	0	0	0	0	0	0
SNORA6	ENSG00000206760	CTGCACACTATTAAAGCTCAGGGTGGAGG		0	0	0	0	0	0	0	0	0	0	0	0	0	0	0	0	0	0	0	0	0	0	0	0	0	0	0	0	0	0	0	0	0	0	0	0	0	0	0	0	0	0	0	0	0	0
SNORA6	ENSG00000206760	GAGCTTGCCTCTATGACTG		0	0	0	0	0	0	0	0	0	0	0	0	0	0	0	0	0	0	0	0	0	0	0	0	0	0	0	0	0	0	0	0	0	0	0	0	0	0	0	0	0	0	0	0	0	0
SNORA57	ENSG00000206597	CTCTGGCCCCCTCGGCGTCA		0	0	0	0	0	0	0	0	0	0	0	0	0	0	0	0	0	0	0	0	0	0	0	0	0	0	0	0	0	0	0	0	0	0	0	0	0	0	0	0	0	0	0	0	0	0
SNORA28	ENSG00000272533	AAGCAACACTCTGTGGCAGATGATC		0	0	0	0	0	0	0	0	0	0	0	0	0	0	0	0	0	0	0	0	0	0	0	0	0	0	0	0	0	0	0	0	0	0	0	0	0	0	0	0	0	0	0	0	0	0
RF00407	ENSG00000281311	CGCGCTGTCTTTGAGCCCCCGC		0	0	0	0	0	0	0	0	0	0	0	0	0	0	0	0	0	0	0	0	0	0	0	0	0	0	0	0	0	0	0	0	0	0	0	0	0	0	0	0	0	0	0	0	0	0
SNORA81	ENSG00000221420	TCTTAAGATTTGGTGCAATAT		0	0	0	0	0	0	0	0	0	0	0	0	0	0	0	0	0	0	0	0	0	0	0	0	0	0	0	0	0	0	0	0	0	0	0	0	0	0	0	0	0	0	0	0	0	0
SNORA1B	ENSG00000199405	GTGACAATGAGACCTGTAACAT		0	0	0	0	0	0	0	0	0	0	0	0	0	0	0	0	0	0	0	0	0	0	0	0	0	0	0	0	0	0	0	0	0	0	0	0	0	0	0	0	0	0	0	0	0	0
RF00408	ENSG00000207407	TGACAATGAGACCTGTAACAT		0	0	0	0	0	0	0	0	0	0	0	0	0	0	0	0	0	0	0	0	0	0	0	0	0	0	0	0	0	0	0	0	0	0	0	0	0	0	0	0	0	0	0	0	0	0
SNORA53	ENSG00000212443	TACTATCAGGACTCGACTCGTGTGC		0	0	0	0	0	0	0	0	0	0	0	0	0	0	0	0	0	0	0	0	0	0	0	0	0	0	0	0	0	0	0	0	0	0	0	0	0	0	0	0	0	0	0	0	0	0
SNORA63	ENSG00000200320	GACGCTTGGTCTCATACA		0	0	0	0	0	0	0	0	0	0	0	0	0	0	0	0	0	0	0	0	0	0	0	0	0	0	0	0	0	0	0	0	0	0	0	0	0	0	0	0	0	0	0	0	0	0
SNORD50B	ENSG00000275072	TACGGATTCGGCTTCTGA		0	0	0	0	0	0	0	0	0	0	0	0	0	0	0	0	0	0	0	0	0	0	0	0	0	0	0	0	0	0	0	0	0	0	0	0	0	0	0	0	0	0	0	0	0	0
SNORD111B	ENSG00000221514	ATTTTTGTGTGTCTGATC		0	0	0	0	0	0	0	0	0	0	0	0	0	0	0	0	0	0	0	0	0	0	0	0	0	0	0	0	0	0	0	0	0	0	0	0	0	0	0	0	0	0	0	0	0	0
SNORD30	ENSG00000277846	GTTTGTGATGACTTACATGG		6835	7046	138141	255194	61718	82383	149708	71615	151948	92259	223029	171123	119314	195447	124678	147124	112868	92261	71363	272290	69278	90642	55445	216627	77772	118763	6862	7846	7543	63259	11225	15514	19735	7948	4512	12704	6500	39340	34870	13177	6484	9845	2751	8358	6224	4223
SNORD1B	ENSG00000199961	CTGTCTGAAGGCAAAGAAAG		0	0	0	0	0	0	0	0	0	0	0	0	0	0	0	0	0	0	0	0	0	0	0	0	0	0	0	0	0	0	0	0	0	0	0	0	0	0	0	0	0	0	0	0	0	0
RF00345	ENSG00000281010	CTGATTATTTAGCAAGACTGA		0	0	0	0	0	0	0	0	0	0	0	0	0	0	0	0	0	0	0	0	0	0	0	0	0	0	0	0	0	0	0	0	0	0	0	0	0	0	0	0	0	0	0	0	0	0
SNORD82	ENSG00000202400	ACAAATGATGAATAACAAAGGG		0	0	0	0	0	0	0	0	0	0	0	0	0	0	0	0	0	0	0	0	0	0	0	77	0	0	0	0	0	0	0	0	0	0	0	0	0	0	0	0	0	0	0	0	0	0
SNORD69	ENSG00000212452	CTGTTCAATCCAACCCTGAG		0	0	0	0	0	0	0	0	0	0	0	0	0	0	0	0	0	0	0	0	0	0	0	0	0	0	0	0	0	0	0	0	0	0	0	0	0	0	0	0	0	0	0	0	0	0
SNORD12C	ENSG00000209042	TCCCCATCAGATCGACAATGCT		0	0	0	0	0	0	0	0	0	0	0	0	0	0	0	0	0	0	0	0	0	0	0	0	0	0	0	0	0	0	0	0	0	0	0	0	0	0	0	0	0	0	0	0	0	0
SNORD93	ENSG00000221740	GCTGTGATGGATTAAAGGATTTACCT		0	0	0	0	0	0	0	0	0	0	0	0	0	0	0	0	0	0	0	0	0	0	0	0	0	0	0	0	0	0	0	0	0	0	0	0	0	0	0	0	0	0	0	0	0	0
SNORD10	ENSG00000238917	CTCTGTGATGGAGCCCATGC		0	0	0	0	0	0	0	0	0	0	0	0	0	0	0	0	0	0	0	0	0	0	0	0	0	0	0	0	0	0	0	0	0	0	0	0	0	0	0	0	0	0	0	0	0	0
SNORD116-8	ENSG00000207093	GATCGATGATGAGTCCTC		0	0	0	0	0	0	0	0	0	0	0	0	0	0	0	0	0	0	0	0	0	0	0	0	0	0	0	0	0	0	0	0	0	0	0	0	0	0	0	0	0	0	0	0	0	0
SNORA7A	ENSG00000207496	ATTCTGCCAGCTTCGGAAA		0	0	0	0	0	0	0	0	0	0	0	0	0	0	0	0	0	0	0	0	0	0	0	0	0	0	0	0	0	0	0	0	0	0	0	0	0	0	0	0	0	0	0	0	0	0
SNORD62A	ENSG00000235284	ACTGTGGACTCAATAG		0	0	0	0	0	0	0	0	0	0	0	0	0	0	0	0	0	0	0	0	0	0	0	0	0	0	0	0	0	0	0	0	0	0	0	0	0	0	0	0	0	0	0	0	0	0
SNORD12	ENSG00000212304	GCAGCTGATGATACAGCTTCTTTCCCC		0	0	0	0	0	0	0	0	0	0	0	0	0	0	0	0	0	0	0	0	0	0	0	0	0	0	0	0	0	0	0	0	0	0	0	0	0	0	0	0	0	0	0	0	0	0
SNORD14D	ENSG00000207118	GTAGTTTCCACCAGAAAGTC		0	0	0	0	0	0	0	0	0	0	0	0	0	0	0	0	0	0	0	0	0	0	0	0	0	0	0	0	0	0	0	0	0	0	0	0	0	0	0	0	0	0	0	0	0	0
SNORA73A	ENSG00000274266	AACGTTGGAAATAAAGCTG		0	0	0	0	0	0	0	0	0	0	0	0	0	0	0	0	0	0	0	0	0	0	0	0	0	0	0	0	0	0	0	0	0	0	0	0	0	0	0	0	0	0	0	0	0	0
SNORD83A	ENSG00000209482	CTGCCTTCCTTCTGAG		0	0	0	0	0	0	0	0	0	0	0	0	0	0	0	0	0	0	0	0	0	0	0	0	0	0	0	0	0	0	0	0	0	0	0	0	0	0	0	0	0	0	0	0	0	0
SNORD46	ENSG00000200913	CCAATGCAAGGACTTGTCATAGTTA		0	0	0	0	0	0	0	0	0	0	0	0	0	0	0	0	0	0	0	0	0	0	0	0	0	0	0	0	0	0	0	0	0	0	0	0	0	0	0	0	0	0	0	0	0	0
SNORD5	ENSG00000239195	TCAGATGATGAATTTAACTGTT		0	0	0	0	0	0	0	0	0	0	0	0	0	0	0	0	0	0	0	0	0	0	0	0	0	0	0	0	0	0	0	0	0	0	0	0	0	0	0	0	0	0	0	0	0	0
SNORD22	ENSG00000277194	TCCCAATGAAGAAACTTTC		0	0	0	0	0	0	0	0	0	0	0	0	0	0	0	0	0	0	0	0	0	0	0	0	0	0	0	0	0	0	0	0	0	0	0	0	0	0	0	0	0	0	0	0	0	0
SNORD22	ENSG00000277194	GTGAACCCACTGGGA		0	0	0	0	0	0	0	0	0	0	0	0	0	0	0	0	0	0	0	0	0	0	0	0	0	0	0	0	0	0	0	0	0	0	0	0	0	0	0	0	0	0	0	0	0	0
SNORD100	ENSG00000221500	GTACATGATGACAACTGGCTC		0	0	0	0	0	0	0	0	0	0	0	0	0	0	0	0	0	0	0	0	0	0	0	0	0	0	0	0	0	0	0	0	0	0	0	0	0	0	0	0	0	0	0	0	0	0
SNORD100	ENSG00000221500	ACTGCCATGTCACCCTTCTG		0	0	0	0	0	0	0	0	0	0	0	0	0	0	0	0	0	0	0	0	0	0	0	0	0	0	0	0	0	0	0	0	0	0	0	0	0	0	0	0	0	0	0	0	0	0
SNORD123	ENSG00000239112	GAAAATGATGAATTCTGGGGCG		0	0	0	0	0	0	0	0	0	0	0	0	0	0	0	0	0	0	0	0	0	0	0	0	0	0	0	0	0	0	0	0	0	0	0	0	0	0	0	0	146	0	0	0	0	0
SNORA77	ENSG00000221643	GCAGACTCACTATGCACCTGACTG		0	0	0	0	0	0	0	0	0	0	0	0	0	0	0	0	0	0	0	0	0	0	0	0	0	0	0	0	0	0	0	0	0	0	0	0	0	0	0	0	116	0	0	0	0	0
SNORA77	ENSG00000221643	CAGCTCCCTGGGGACACA		0	0	0	0	0	0	0	0	0	0	0	0	0	0	0	0	0	0	0	0	0	0	0	0	0	0	0	0	0	0	0	0	0	0	0	0	0	0	0	0	0	0	0	0	0	0
SNORA74A	ENSG00000200959	TGTTTTGGTGTTGTAGC		0	0	0	0	0	0	0	0	0	0	0	0	0	0	0	0	0	0	0	0	0	0	0	0	0	0	0	0	0	0	0	0	0	0	0	0	0	0	0	0	0	0	0	0	0	0
SNORD17	ENSG00000212232	TAGGAACTTGAGGCTAT		0	0	0	0	0	0	0	0	0	0	0	0	0	0	0	0	0	0	0	0	0	0	0	0	0	0	0	0	0	0	0	0	0	0	0	0	0	0	0	0	0	0	0	0	0	0
SNORD116-15	ENSG00000207174	TCCTCGTCAAACTGAGGT		0	0	0	0	0	0	0	0	0	0	0	0	0	0	0	0	0	0	0	0	0	0	0	0	0	0	0	0	0	0	0	0	0	0	0	0	0	0	0	0	0	0	0	0	0	0
SNORA61	ENSG00000278274	TCCCATCGGATCTGAACA		0	0	0	0	0	0	0	0	0	0	0	0	0	0	0	0	0	0	0	0	0	0	0	0	0	0	0	0	0	0	0	0	0	0	0	0	0	0	0	0	0	0	0	0	0	0
SNORD15A	ENSG00000206941	CTTCGATGAAGAGATGATGACGAGTCTG		0	0	0	0	0	0	0	0	0	0	0	0	0	0	0	0	0	0	0	0	0	0	0	0	0	0	0	0	0	0	0	0	0	0	0	0	0	0	0	0	0	0	0	0	0	0
SNORD65	ENSG00000277512	AAATGATGAAATCACCCAAA		0	0	0	0	0	0	0	0	0	0	0	0	0	0	0	0	0	0	0	0	0	0	0	0	0	0	0	0	0	0	0	0	0	0	0	0	0	0	0	0	0	0	0	0	0	0
SNORD65	ENSG00000277512	AGATTGTGTAGTGGTGAACCTATG		0	0	0	0	0	0	0	0	0	0	0	0	0	0	0	0	0	0	0	0	0	0	0	0	0	0	0	0	0	0	0	0	0	0	0	0	0	0	0	0	0	0	0	0	0	0
SNORD14A	ENSG00000272034	TTATGTTGGCCAGTTCTTC		0	0	0	0	0	0	0	0	0	0	0	0	0	0	0	0	0	0	0	0	0	0	0	0	0	0	0	0	0	0	0	0	0	0	0	0	0	0	0	0	0	0	0	0	0	0
SNORD14A	ENSG00000272034	CTTCCTTGGATGTCTGAGT		0	0	0	0	0	0	0	0	0	0	0	0	0	0	0	0	0	0	0	0	0	0	0	0	0	0	0	0	0	0	0	0	0	0	0	0	0	0	0	0	0	0	0	0	0	0
SNORD16	ENSG00000199673	GACGAAAATTCTTACTGAG		0	0	0	0	0	0	0	0	0	0	0	0	0	0	0	0	0	0	0	0	0	0	0	0	0	0	0	0	0	0	0	0	0	0	0	0	0	0	0	0	0	0	0	0	0	0
RF00012	ENSG00000277754	CTATACTTTCAGGGAT		0	0	0	0	0	0	0	0	0	0	0	0	0	0	0	0	0	0	0	0	0	0	0	0	0	0	0	0	0	0	0	0	0	0	0	0	0	0	0	0	0	0	0	0	0	0
RF00432	ENSG00000207147	TCCCAAAGTGCTGGGA		0	0	0	0	0	0	0	0	0	0	0	0	0	0	0	0	0	0	0	0	0	0	0	0	0	0	0	0	0	0	0	0	0	0	0	0	0	0	0	0	0	0	0	0	0	0
SNORD116-13	ENSG00000207137	TTGGAAAGCTGAACAA		0	0	0	0	0	0	0	0	0	0	0	0	0	0	0	0	0	0	0	0	0	0	0	0	0	0	0	0	0	0	0	0	0	0	0	0	0	0	0	0	0	0	0	0	0	0
SNORA14B	ENSG00000207181	CTGCATTCTTAAACCCTCTTGGTAGCTT		0	0	0	0	0	0	0	0	0	0	0	0	0	0	0	0	0	0	0	0	0	0	0	0	0	0	0	0	0	0	0	0	0	0	0	0	0	0	0	0	0	0	0	0	0	0
SNORA80B	ENSG00000206633	GCATGGGTTTGGATTTATG		0	0	0	0	0	0	0	0	0	0	0	0	0	0	0	0	0	0	0	0	0	0	0	0	0	0	0	0	0	0	0	0	0	0	0	0	0	0	0	0	0	0	0	0	0	0
SNORA80B	ENSG00000206633	ATGCCAGAGCAAACTGTGTCCCCGAA		0	0	0	0	0	0	0	0	0	0	0	0	0	0	0	0	0	0	0	0	0	0	0	0	0	0	0	0	0	0	0	0	0	0	0	0	0	0	0	0	0	0	0	0	0	0
SNORA36C	ENSG00000207016	CATTTGCCTCCCAGCCTAC		0	0	0	0	0	0	0	0	0	0	0	0	0	0	0	0	0	0	0	0	0	0	0	0	0	0	0	0	0	0	0	0	0	0	0	0	0	0	0	0	0	0	0	0	0	0
SNORA36A	ENSG00000206948	CATTTGCCTCCCAGCCTAC		0	0	0	0	0	0	0	0	0	0	0	0	0	0	0	0	0	0	0	0	0	0	0	0	0	0	0	0	0	0	0	0	0	0	0	0	0	0	0	0	0	0	0	0	0	0
SNORD9	ENSG00000199436	CCCCTGTGATGAGTTGCCAT		0	0	0	0	0	0	0	0	0	0	0	0	0	0	0	0	0	0	0	0	0	0	0	0	0	0	0	0	0	0	0	0	0	0	0	0	0	0	0	0	0	0	0	0	0	0
SNORA13	ENSG00000238363	AAGGCGTAAATTAAACGCTTT		0	0	0	0	0	0	0	0	0	0	0	0	0	0	0	0	0	0	0	0	0	0	0	0	0	0	0	0	0	0	0	0	0	0	0	0	0	0	0	0	0	0	0	0	0	0
SNORA33	ENSG00000200534	AAGTCGTTAAGGTCCCTGAGA		0	0	0	0	0	0	0	0	0	0	0	0	0	0	0	0	0	0	0	0	0	0	0	0	0	0	0	0	0	0	0	0	0	0	0	0	0	0	0	0	0	0	0	0	0	0
SNORA33	ENSG00000200534	AGGTCCCTGAGAATGGCTATAAC		0	0	0	0	0	0	0	0	0	0	0	0	0	0	0	0	0	0	0	0	0	0	0	0	0	0	0	0	0	0	0	0	0	0	0	0	0	0	0	0	0	0	0	0	0	0
SNORA71A	ENSG00000225091	GAACCCTGAAGCTTTCACA		0	0	0	0	0	0	0	0	0	0	0	0	0	0	0	0	0	0	0	0	0	0	0	0	0	0	0	0	0	0	0	0	0	0	0	0	0	0	0	0	0	0	0	0	0	0
SNORA9	ENSG00000277184	TTGCTAGAACAGTTTTGAAAC		0	0	0	0	0	0	0	0	0	0	0	0	0	0	0	0	0	0	0	0	0	0	0	0	0	0	0	0	0	0	0	0	0	0	0	0	0	0	0	0	0	0	0	0	0	0
SNORA11	ENSG00000221716	CTATGAACAAACGTCCCCCAA		0	0	0	0	0	0	0	0	0	0	0	0	0	0	0	0	0	0	0	0	0	0	0	0	0	0	0	0	0	0	0	0	0	0	0	0	0	0	0	0	0	0	0	0	0	0
SNORA23	ENSG00000201998	CTCTGGACACATCTACCACTG		0	0	0	0	0	0	0	0	0	0	0	0	0	0	0	0	0	0	0	0	0	0	0	0	0	0	0	0	0	0	0	0	0	0	0	0	0	0	0	0	0	0	0	0	0	0
SNORA28	ENSG00000272533	GTTATATAGACTTAAACA		0	0	0	0	0	0	0	0	0	0	0	0	0	0	0	0	0	0	0	0	0	0	0	0	0	0	0	0	0	0	0	0	0	0	0	0	0	0	0	0	0	0	0	0	0	0
SNORD116-4	ENSG00000275529	ACATTCCTTGGAAAAGCTG		0	0	0	0	0	0	0	0	0	0	0	0	0	0	0	0	0	0	0	0	0	0	0	0	0	0	0	0	0	0	0	0	0	0	0	0	0	0	0	0	0	0	0	0	0	0
RF00322	ENSG00000252349	AGATTGAATTGGGGAATACA		0	0	0	0	0	0	0	0	0	0	0	0	0	0	0	0	0	0	0	0	0	0	0	0	0	0	0	0	0	0	0	0	0	0	0	0	0	0	0	0	0	0	0	0	0	0
SNORA66	ENSG00000207523	TGCAAACTCGATCACTAGCTCT		0	0	0	0	0	0	0	0	0	0	0	0	0	0	0	0	0	0	0	0	0	0	0	0	0	0	0	0	0	0	0	0	0	0	0	0	0	0	0	0	0	0	0	0	0	0
SNORA66	ENSG00000207523	GTTCTTTCTATCCTAGTACAG		0	0	0	0	0	0	0	0	0	0	0	0	0	0	0	0	0	0	0	0	0	0	0	0	0	0	0	0	0	0	0	0	0	0	0	0	0	0	0	0	0	0	0	0	0	0
SNORA81	ENSG00000221420	AATTGCAGACACTAGGA		0	0	0	0	0	0	0	0	0	0	0	0	0	0	0	0	0	0	0	0	0	0	0	0	0	0	0	0	0	0	0	0	0	0	0	0	0	0	0	0	0	0	0	0	0	0
SNORA62	ENSG00000202363	TGCACATTGTTAGAGCTTGGAGTTGAGG		0	0	0	0	0	0	0	0	0	0	0	0	0	0	0	0	0	0	0	0	0	0	0	0	0	0	0	0	0	0	0	0	0	0	0	0	0	0	0	0	0	0	0	0	0	0
SNORA74D	ENSG00000252213	TACCCCAGGATGCCAGCAT		0	0	0	0	0	0	0	0	0	0	0	0	0	0	0	0	0	0	0	0	0	0	0	0	0	0	0	0	0	0	0	0	0	0	0	0	0	0	0	0	0	0	0	0	0	0
SNORA52	ENSG00000199785	TCATGGGCACTTCTAGACACT		0	0	0	0	0	0	0	0	0	0	0	0	0	0	0	0	0	0	0	0	0	0	0	0	0	0	0	0	0	0	0	0	0	0	0	0	0	0	0	0	0	0	0	0	0	0
SNORA53	ENSG00000212443	GTTTCTTGTGGTTCCAGTA		0	0	0	0	0	0	0	0	0	0	0	0	0	0	0	0	0	0	0	0	0	0	0	0	0	0	0	0	0	0	0	0	0	0	0	0	0	0	0	0	0	0	0	0	0	0
SNORD115-32	ENSG00000200949	GTCAATGATGAGAACCTG		0	0	0	0	0	0	0	0	0	0	0	0	0	0	0	0	0	0	0	0	0	0	0	0	0	0	0	0	0	0	0	0	0	0	0	0	0	0	0	0	0	0	0	0	0	0
SNORA56	ENSG00000206693	GCTTTAGACTTGCCAGATAA		0	0	0	0	0	0	0	0	0	0	0	0	0	0	0	0	0	0	0	0	0	0	0	0	0	0	0	0	0	0	0	0	0	0	0	0	0	0	0	0	0	0	0	0	0	0
RF00086	ENSG00000252128	CTCCATGATGAACCCAAA		0	0	0	0	0	0	0	0	0	0	0	0	0	0	0	0	0	0	0	0	0	0	0	0	0	0	0	0	0	0	0	0	0	0	0	0	0	0	0	0	0	0	0	0	0	0
SNORA47	ENSG00000238961	TGGAGGACTGAGAAGGTG		0	0	0	0	0	0	0	0	0	0	0	0	0	0	0	0	0	0	0	0	0	0	0	0	0	0	0	0	0	0	0	0	0	0	0	0	0	0	0	0	0	0	0	0	0	0
SNORD117	ENSG00000266419	CTATCACCCATGACTGAT		0	0	0	0	0	0	0	0	0	0	0	0	0	0	0	0	0	0	0	0	0	0	0	0	0	0	0	0	0	0	0	0	0	0	0	0	0	0	0	0	0	0	0	0	0	0
SNORD68	ENSG00000200084	ATCGCTGTACGGCCTTGATGAAAG		0	0	0	0	0	0	0	0	0	0	0	0	0	0	0	0	0	0	0	0	0	0	0	0	0	0	0	0	0	0	0	0	0	0	0	0	0	0	0	0	0	0	0	0	0	0
RF00012	ENSG00000201368	CTATACTTTCAGGGAT		0	0	0	0	0	0	0	0	0	0	0	0	0	0	0	0	0	0	0	0	0	0	0	0	0	0	0	0	0	0	0	0	0	0	0	0	0	0	0	0	0	0	0	0	0	0
RF00012	ENSG00000199851	CTATACTTTCAGGGAT		0	0	0	0	0	0	0	0	0	0	0	0	0	0	0	0	0	0	0	0	0	0	0	0	0	0	0	0	0	0	0	0	0	0	0	0	0	0	0	0	0	0	0	0	0	0
RF00012	ENSG00000200318	CTATACTTTCAGGGATC		0	0	0	0	0	0	0	0	0	0	0	0	0	0	0	0	0	0	0	0	0	0	0	0	0	0	0	0	0	0	0	0	0	0	0	0	0	0	0	0	0	0	0	0	0	0
RF00012	ENSG00000199856	CTATACTTTCAGGGAT		0	0	0	0	0	0	0	0	0	0	0	0	0	0	0	0	0	0	0	0	0	0	0	0	0	0	0	0	0	0	0	0	0	0	0	0	0	0	0	0	0	0	0	0	0	0
RF00012	ENSG00000201346	CTATACTTTCAGGGAT		0	0	0	0	0	0	0	0	0	0	0	0	0	0	0	0	0	0	0	0	0	0	0	0	0	0	0	0	0	0	0	0	0	0	0	0	0	0	0	0	0	0	0	0	0	0
RF00012	ENSG00000200538	CTATACTTTCAGGGAT		0	0	0	0	0	0	0	0	0	0	0	0	0	0	0	0	0	0	0	0	0	0	0	0	0	0	0	0	0	0	0	0	0	0	0	0	0	0	0	0	0	0	0	0	0	0
RF00012	ENSG00000221040	CTATACTTTCAGGGAT		0	0	0	0	0	0	0	0	0	0	0	0	0	0	0	0	0	0	0	0	0	0	0	0	0	0	0	0	0	0	0	0	0	0	0	0	0	0	0	0	0	0	0	0	0	0
RF00012	ENSG00000212434	CTATACTTTCAGGGAT		0	0	0	0	0	0	0	0	0	0	0	0	0	0	0	0	0	0	0	0	0	0	0	0	0	0	0	0	0	0	0	0	0	0	0	0	0	0	0	0	0	0	0	0	0	0
RF00012	ENSG00000212551	CTATACTTTCAGGGAT		0	0	0	0	0	0	0	0	0	0	0	0	0	0	0	0	0	0	0	0	0	0	0	0	0	0	0	0	0	0	0	0	0	0	0	0	0	0	0	0	0	0	0	0	0	0
RF00012	ENSG00000271817	CTATACTTTCAGGGAT		0	0	0	0	0	0	0	0	0	0	0	0	0	0	0	0	0	0	0	0	0	0	0	0	0	0	0	0	0	0	0	0	0	0	0	0	0	0	0	0	0	0	0	0	0	0
RF00012	ENSG00000212321	CTATACTTTCAGGGAT		0	0	0	0	0	0	0	0	0	0	0	0	0	0	0	0	0	0	0	0	0	0	0	0	0	0	0	0	0	0	0	0	0	0	0	0	0	0	0	0	0	0	0	0	0	0
SNORA77B	ENSG00000264346	CAGCTCCCTGGGGACAC		0	0	0	0	0	0	0	0	0	0	0	0	0	0	0	0	0	0	0	0	0	0	0	0	0	0	0	0	0	0	0	0	0	0	0	0	0	0	0	0	0	0	0	0	0	0
SNORD70	ENSG00000212534	TCGTCACTACCACTGA		0	0	0	0	0	0	0	0	0	0	0	0	0	0	0	0	0	0	0	0	0	0	0	0	0	0	0	0	0	0	0	0	0	0	0	0	0	0	0	0	0	0	0	0	0	0
SNORD70B	ENSG00000212309	TTCGTCACTACCACTGA		0	0	0	0	0	0	0	0	0	0	0	0	0	0	0	0	0	0	0	0	0	0	0	0	0	0	0	0	0	0	0	0	0	0	0	0	0	0	0	0	0	0	0	0	0	0
SNORA19	ENSG00000207468	GTGCACATTTCATTGACCT		0	0	0	0	0	0	0	0	0	0	0	0	0	0	0	0	0	0	0	0	0	0	0	0	0	0	0	0	0	0	0	0	0	0	0	0	0	0	0	0	0	0	0	0	0	0
SNORD14E	ENSG00000200879	TTCCTTGGATGTCTGAGTG		0	0	0	0	0	0	0	0	0	0	0	0	0	0	0	0	0	0	0	0	0	0	0	0	0	0	0	0	0	0	0	0	0	0	0	0	0	0	0	0	0	0	0	0	0	0
SNORD36B	ENSG00000281243	GTGATGTAAAATTTCTTGGCCTG		0	0	0	0	0	0	0	0	0	0	0	0	0	0	0	0	0	0	0	0	0	0	0	0	0	0	0	0	0	0	0	0	0	0	0	0	0	0	0	0	0	0	0	0	0	0
SNORD7	ENSG00000207297	TGCGATGATGAGTGAAGTAGAGCCT		0	0	0	0	0	0	0	0	0	0	0	0	0	0	0	0	0	0	0	0	0	0	0	0	0	0	0	0	0	0	0	0	0	0	0	0	0	0	0	0	0	0	0	0	0	0
SNORD3D	ENSG00000277947	GGAGAGAACGCGGTCTGAGTG		3332	2720	8749	6111	670	1591	7544	3218	3049	3628	2353	1874	2808	3140	1463	4247	1789	2116	1350	4354	314	2226	4276	2437	2265	2174	1872	11894	3255	1186	3113	1724	4706	3281	1583	2414	1523	8728	5017	2494	8275	2916	1046	1181	2859	4075
SNORD3D	ENSG00000281000	GGAGAGAACGCGGTCTGAGTG		3332	2720	8748	6110	669	1591	7543	3218	3049	3626	2350	1873	2808	3139	1463	4238	1788	2113	1350	4350	314	2226	4274	2436	2265	2174	1871	11891	3255	1186	3113	1722	4706	3279	1583	2413	1523	8728	5015	2492	8274	2916	1046	1181	2859	4073
SNORD104	ENSG00000199753	GCGGGTGATGCGAACTGGAGTCTGAG		10715	7805	8688	15516	7461	1776	2991	8173	3827	2520	12454	2817	5580	3496	6250	9545	2539	5781	1636	8049	5145	6574	2280	9291	7308	6376	1888	11948	6882	2708	3149	2981	6867	5800	1816	3483	4806	10904	11033	15710	130294	15095	2706	4357	7905	13038
RF00012	ENSG00000221461	AAGTTTCTCTGAACGTGTAGA		986	1619	5818	1993	929	1281	6155	1593	1911	740	3778	1793	2133	2954	1171	1946	1727	2378	959	5988	597	2535	1781	2159	1661	1550	847	1467	670	989	1162	466	1049	1129	1294	1678	702	1303	1160	2025	3298	1279	1272	827	1727	1880
RF00012	ENSG00000212182	AAGTTTCTCTGAACGTGTAGA		967	1595	5849	1986	919	1269	5948	1570	1874	737	3826	1751	2082	2939	1166	1927	1692	2340	942	5962	602	2527	1766	2166	1657	1534	831	1440	659	970	1151	454	1033	1118	1276	1652	695	1265	1145	1970	3220	1255	1255	829	1729	1840
SNORD66	ENSG00000212158	CACCATGATGGAACTGAGGATCTGAG		5371	3365	7059	6778	4341	2074	2701	4495	3373	2298	8829	2931	3025	2821	5070	9513	1900	3681	1647	7620	3479	3974	2469	4854	5595	4654	1685	7163	2648	1408	2212	3118	4560	3042	1912	2661	2365	6997	5411	7489	45918	7681	2102	1936	3215	10726
SNORD90	ENSG00000212447	CCTACTGTGGAATCTGAAG		327	1104	1133	715	377	357	1194	228	574	323	1635	569	282	379	1900	1317	291	224	184	2223	170	412	199	470	530	450	887	1370	674	313	528	724	1121	573	502	993	689	1100	758	815	2186	310	620	764	631	679
[truncated: 517 more columns]
